# Supplementary material for: Chromosomal-Level Assembly of the Asian Seabass Genome Using Long Sequence Reads and Multi-layered Scaffolding
Source: PLoS Genet. 2016 Apr 15;12(4):e1005954. doi: 10.1371/journal.pgen.1005954 (PMC4833346; doi:10.1371/journal.pgen.1005954)
Supplement: S6 Table — (XLSX) [file pgen.1005954.s021.xlsx]

## Sheet: 6
S6 Table. Asian seabass repeat libraries
Asian seabass repeat library	Scout output length	TE output repeat class	TrPsi output repeat class	RepBase	scout_TR_rDNA	Repeat class	Total length in genome	Comments
R=11 (RR=12. TRF=0.000 NSEG=0.000)	20016	LTR	#N/A	5S_DM	5SrDNA	rDNA	834836
R=110 (RR=108. TRF=0.000 NSEG=0.031)	20016	LTR	#N/A	LTR167_MD,CR1-12_HM	#N/A	LTR	329354
R=35 (RR=34. TRF=0.000 NSEG=0.042)	20016	LTR	#N/A	U2_sat,U1_LV	#N/A	LTR	642885
R=419 (RR=411. TRF=0.204 NSEG=0.210)	20016	LTR	#N/A	LSU-rRNA_Hsa,BEL-233_AA-I,Merlin-1_Aplcal,RETROSAT4_LTR,piggyBac-4_BF,LSU-rRNA_Mfr,Crack-1_CP,TguERVK4_LTR1a,Copia-103_AA-I,CRTOC1,Gypsy-8-I_CR,TC2_FR2,PIF_Harbinger-1_EmiHux,Gypsy-50_GA-LTR	18SrDNA,T_47,T_80	rDNA, TR	865193
R=70 (RR=69. TRF=0.194 NSEG=0.219)	20016	LTR	#N/A	LSU-rRNA_Hsa,BEL-233_AA-I,RETROSAT4_LTR,piggyBac-4_BF,LSU-rRNA_Mfr,Crack-1_CP,TguERVK4_LTR1a,Copia-103_AA-I,CRTOC1,Gypsy-8-I_CR,TC2_FR2,PIF_Harbinger-1_EmiHux,Gypsy-50_GA-LTR	18SrDNA,T_47,T_80	unclear	256710
R=993 (RR=982. TRF=0.356 NSEG=0.041)	16872	LTR	#N/A	hATx-2_HM	#N/A	LTR	87561
R=137 (RR=133. TRF=0.053 NSEG=0.061)	16188	LTR	#N/A	#N/A	#N/A	LTR	103871
R=155 (RR=150. TRF=0.232 NSEG=0.049)	14480	LTR	#N/A	L1C_Mim,L1-28_ACar	#N/A	LTR	290074
Contig19	12903	LTR	#N/A	Penelope-1_AFC,tRNAGlyGGC_CB,tRNA-Met_,tRNAAlaAGC_CB,hATw-2_SP	#N/A	LTR	351800
R=1311 (RR=1300. TRF=0.009 NSEG=0.074)	12488	DNA	#N/A	ERE2_EH,Tc1-4Ory,Penelope-12_XT,Ginger1-1_HM,Kolobok-4_TV,Academ-3_HM,CR1-42_HM	#N/A	DNA Transposon	87370
Contig81	12114	DNA	#N/A	MER6A,TRE3D,SMAR2,Gypsy-605_AA-I,L1_AC_5,MER6,DIRS-14_DR,CR1-4_TCa,EnSpm-16_HM,ATCOPIA92_I,REX1-8_XT,BSCLOVECA,hAT-41_SM,piggyBac-N2A_XT,Jockey-1_DYa,DOC5_DM,MARINER62_CB	#N/A	DNA Transposon	737537
R=288 (RR=280. TRF=0.412 NSEG=0.000)	11838	LTR	#N/A	REP-1_DEl	T_213b,T_33a,T_33b	LTR, TR	157846
R=1057 (RR=1046. TRF=0.375 NSEG=0.038)	11723	LTR	#N/A	#N/A	#N/A	LTR	208095
R=1059 (RR=1048. TRF=0.002 NSEG=0.106)	11263	LINE	LINE	L1-4_DR,L1HS,L1-3_DR,L1_AC_18,5S_DM,Gypsy9-I_Dya,Daphne-21_HMa,L1-23_ACar,I-1_AA,ERV3-1_CJ-I,BLOOD_I,L1-2_DR,L1PREC2,CR1-89_HM	5SrDNA	rDNA	308344
Contig74	11014	DNA	#N/A	REX1-4_AFC,REX1_FS,REX1-1_GA,L1M7_5end,Transib-20_HM,ATREP11,Gypsy-33_DWil-I,MER6A,TRE3D,Kolobok-N1_HM,hAT-2_AP,Gypsy-605_AA-I,Proto2-3_CS1,Gypsy63-LTR_DR,Polinton-3_TC,Sola1-1_FraCyl,DIRS-14_DR,DNA-9_CQ,EnSpm-16_HM,ATCOPIA92_I,CR1-77_HM,DNA-8-3_HM,Gypsy-36_BG-I,LOR1I,Copia1-I_Dmoj,Chapaev-1_CE,Sola1-1_Smoe	#N/A	DNA Transposon	463785
Contig336	10505	LTR	#N/A	REX1-7_XT,DNA8-56_AP,Tc1-15_Xt,TZF28C,L1M4B,HARBINGER2_DR,Helitron-1_HM,Gypsy149-I_DR,Kolobok-1_NVi,Transib-7_AAe,EnSpmN1_DR,DNA8-5_CQ,L2B-3B_AAe,CR1_AC_1,BEL-125_AA-LTR	T_213a,T_213b,T_261	TR	428415
Contig34	10207	LTR	#N/A	Gypsy-11_GA-I	#N/A	LTR	474589
R=187 (RR=181. TRF=0.000 NSEG=0.064)	10105	LTR	gypsy	Gypsy1-I_GA,Gypsy-47_GA-LTR,Gypsy-6-LTR_XT	#N/A	LTR	245156
Contig555	10031	DNA	#N/A	MAUI,BEL7-I_DR,Tc1-5_Xt,Gypsy-1-I_MI,BEL3-I_DR,CATCH2I_DR,Helitron-N2_DR,TC2_FR3A,TC2_FR5,BEL-229_AA-I,DNA-1_CQ,P1_AP,DNA8-88_AP,L2_AC_16,Outcast-1_DAn,Gypsy-9_SI-I,REX5,DMRP1,SINE3_IP,RNLTR2c	#N/A	DNA Transposon	506478
R=126 (RR=123. TRF=0.000 NSEG=0.000)	10016	LTR	#N/A	#N/A	#N/A	LTR	315084
R=358 (RR=350. TRF=0.000 NSEG=0.126)	10016	Retro	#N/A	CR1-1_HM,Sola1-1_BM,hATm-46_HM	#N/A	Retro	81600
R=378 (RR=370. TRF=0.000 NSEG=0.019)	10016	DNA	#N/A	Gypsy-2_PPc-I,Gypsy-11_ES-I	#N/A	DNA Transposon	184845
R=92 (RR=90. TRF=0.000 NSEG=0.143)	10016	LTR	#N/A	Chapaev3-4_HM,DOC,Polinton-1_CB	#N/A	LTR	720208
R=928 (RR=917. TRF=0.000 NSEG=0.057)	10016	LTR	#N/A	ENSPM-6_DR,Gypsy-9_RP-LTR,CR1_Ele32,CR1-101_AAe	#N/A	LTR	66425
Contig497	9760	LINE	#N/A	CR1-77_HM,LTR28_OC,hATN-4_ACar,GYPSY8-I_AG	#N/A	LINE	72440
R=409 (RR=401. TRF=0.000 NSEG=0.161)	9524	LTR	#N/A	L1-21_ACar,Polinton-1_CB,LTR58_MD,L1_AC_11,L2-2_ME,DINOLT1,DIRS-20_XT	#N/A	LTR	144353
R=8 (RR=9. TRF=0.336 NSEG=0.021)	9278	LTR	#N/A	Mariner-27_HM,hAT-77_HM,ATENSPM7	T_213b,T_33a,T_33b	TR	1842398
R=90 (RR=88. TRF=0.213 NSEG=0.186)	9265	LTR	#N/A	Gypsy144-LTR_DR,Sola1-10_AP,COPIA_DM_I,Gypsy-5N_PPa-LTR,piggyBac-12_SM,CR1-9_NVi	Sat_38	TR	639707
Contig170	8867	DNA	#N/A	LIN10_SM,Copia20-NVi_I,Gypsy-5_DGri-I,P-32_HM,Gypsy-34-I_DR,L2_AC_11,GYPSY9_LTR,Crack-5_AAe,ATHILA5_I	#N/A	DNA Transposon	1033223
Contig1612	8379	DNA	#N/A	BEL7-I_DR,Helitron-N1_SP,Helitron-1_SP	#N/A	DNA Transposon	719250
R=1058 (RR=1047. TRF=0.283 NSEG=0.163)	8365	LTR	#N/A	HAT1_CB,Gypsy-14_GA-LTR,L1M4B,Helitron-2_NVi,DNA-8-5_DR,DIRS-4_SP,BEL-6_DWil-I,Sola2-1_DPu,Daphne-14_HMa,Gypsy-54_MLP-I,hAT-7_XT		LTR	14094899
Contig1293	8308	LTR	#N/A	MER80,Loner_Ele4,RLTR9A3B,CR1-83_AAe,Ambal-1_FCy,Mariner-2_AN	#N/A	LTR	401185
Contig111	8147	DNA	#N/A	REX1-4_AFC,L1-56_XT,DNA-TA-5_DR,EnSpm-3_DR,TRANSPAC_I,NOMAD_I,hAT-5_DR,TIGGU1A_FR,RTEX-1_SP,ERE2_EH,Rex1-3_FR,BovB_PMo,CR1-2_FR,TP2,hAT-54_HM,Sola3-1_HM,Harbinger-N1_PSt	#N/A	DNA Transposon	295230
R=319 (RR=311. TRF=0.072 NSEG=0.060)	7860	LTR	#N/A	#N/A	T_213a,T_261	TR	3340500
R=811 (RR=801. TRF=0.005 NSEG=0.040)	7764	LTR	gypsy	PRIMAX_I,FERVR1_I,ERV1-1-I_DR,FERVR2_I,ERV30_MD,Helitron-1_DR,Gypsy156-I_DR,ZFERV_I,ERV1-3-EC_I,Gypsy-23-I_XT,Gypsy-51_MLP-I,Gypsy-1-I_ACa,HERVFH19I	#N/A	LTR	184496
Contig755	7741	DNA	#N/A	hAT-11_SM,EnSpm-3_DR,L1PA11,hATm-31_HM,Helitron-2_HM,L1-1a_Cis,Polinton1_SM,Clu-186_AG,BEL24-I_DR,Gypsy-14_DPu-I	#N/A	DNA Transposon	381497
Contig800	7649	DNA	#N/A	L1MB3_5,L1_AC_13,Helitron-2_SP,Copia-46_MLP-I,COPI2_I,Gypsy-261_AA-I,HERVIP10FH,MuDR3x_AP,Homo6,Mariner-31_HM,Penelope-12_XT,Kiri-1_DEl,Gypsy-5_SI-I,PRIMA4_I	#N/A	DNA Transposon	79855
Contig6	7630	LTR	#N/A	Mariner-1_NGr,CR1-49_HM,GYPSY5_I,Helitron-2_NVi,DNAX-3_TCa,Sola2-1_DPu,L1-23_ACar,hAT-7_XT,LTR1B_OC	Sat_217	TR	3101054
Contig124	7511	LTR	#N/A	Penelope-6_XT,REX1-4_AFC,CR1-2_FR,REX1-5_XT,L2-1_DR,Gypsy-45_DEl-I,DIRS-39_XT,GYPSY38-I_AG,Penelope-1_OL	#N/A	LTR	266904
R=247 (RR=239. TRF=0.021 NSEG=0.198)	7242	LINE	#N/A	Neptune1_Ren,Merlin-1_Aplcal,HSATI,Penelope-12_XT,CR1-79_HM,TRE3C,hATm-42_HM,hAT-43_HM,hAT-2_ET,ISL2EU-5_HM,TART	#N/A	LINE	197267
R=1827 (RR=1816. TRF=0.321 NSEG=0.019)	7142	LTR	#N/A	#N/A	#N/A	LTR	184927
Contig355	7111	DNA	#N/A	Tc1-14_Xt,PROTOP,DRE,ERE1_EH,L1-2_LA,DNA-6-N2_DR,ATGP5I,DNA-9_CQ,Helitron-2_HM,L2B-6_AAe,Ambal-1_FCy,NDNAX2_CE,Ambal-2_FCy,Ag-Jen-11	#N/A	DNA Transposon	115531
R=238 (RR=230. TRF=0.000 NSEG=0.095)	7075	DNA	#N/A	REX1-4_AFC,Helitron-2_HM,EnSpm-3_DR,TRANSPAC_I,HAT20_CB,ERV1-4N-EC_I,TABOR_I,I-53_AAe,L2-35_DRe,TDR5,GYPSM1_I,Jockey-13_DAn,Sola3-1_HM	#N/A	DNA Transposon	283980
R=490 (RR=481. TRF=0.000 NSEG=0.073)	7047	LTR	#N/A	Copia-2_DEl-I	#N/A	LTR	63758
R=1434 (RR=1423. TRF=0.000 NSEG=0.036)	6971	LTR	#N/A	DNA-8-9_DR	#N/A	LTR	31215
R=1697 (RR=1686. TRF=0.000 NSEG=0.079)	6954	LTR	#N/A	Polinton-2_SM,DNA2-8_AP,GIZMO2_EI,RTEX-6_BF,Copia-1_GDe-I,L1_Carn5_5end	#N/A	LTR	27245
R=330 (RR=322. TRF=0.004 NSEG=0.092)	6922	LINE	LINE	KenoFr1,L1-53_XT,Tx1-6_BF,U2_sat,L1-54_XT,KenoDr1,Gypsy-6_CQ-I,Mariner-34_HM,Crack-27_AAe	#N/A	LINE	234999
Contig429	6873	DNA	#N/A	DNA6-3_MLP,CR1-79_HM,P-1_Hrobusta,L1ME5,LTR4C_SS,Gypsy-203_AA-LTR,TXZ19,CR1-93_AAe,L1-10a_MD,Kolobok-4_TV,Ginger1-5_HM,MuDr-3_HM,BEL1_MH-LTR,Penelope-1_CQ	#N/A	DNA Transposon	259615
R=398 (RR=390. TRF=0.011 NSEG=0.205)	6730	LINE	cacta	L1-3_DR,L1PB2c,L2_Plat1b,L1HS,5S_DM,Gypsy9-I_Dya,L1_AC_3,Daphne-21_HMa,BEL-1_BMa-I,L1-23_ACar,I-1_AA,L1-2_DR,BLOOD_I,DIRS1_DR,CR1-89_HM	5SrDNA	rDNA, LINE	125123
Contig1	6678	DNA	#N/A	ONSATB,BEL-44_AA-LTR,hAT-83_HMa,Outcast-17_AAe,Gypsy-6_DTa-I,Ginger1-2_HM,hAT-5_AP,L2-41_DRe	Asian_seabass_ONSAT_SB	DNA, TR	5229660
Contig39	6646	LTR	#N/A	Helitron-2_DR,Helitron-1_SP,Urukhai_Cis,Helitron-2_NVi,Gypsy7-NVi_I,HAT20_CB,CryptonA-1_OL,Helitron-4N1_SMo,GYPSY8-I_AG,Gypsy9-I_DR,L2-35_DRe,hAT-67_HM,RTE-14_SP,Jockey-13_DAn,Copia-19_AA-I	#N/A	LTR	323758
Contig557	6427	DNA	#N/A	VANDAL1,hAT-80_HM,MLTR31E_MM,CR1-1_LG,RTEX-12_BF,Gypsy-22_DPu-I,Copia-14_DPu-I	#N/A	DNA Transposon	257623
Contig70	6415	LTR	#N/A	Gypsy-16_GA-I,Gypsy-36_GA-I,ACCORD_I,Gypsy51-LTR_DR,MuDR3x_AP,ATMU11	#N/A	LTR	173134
Contig1727	6408	LTR	#N/A	HELITRON10_CB,REX1-5_XT,Polinton-1_SM,Gypsy-10_DWil-I,ERV3-1Na1a_MEu-LTR,L1-1A_Cpo,L1M2C_5,BEL-4_CQ-LTR,EnSpm-N1_OS,L1PBA_5	T_213a,T_213b,T_261	LTR, TR	408196
Contig205	6394	DNA	#N/A	SINE2-1_GA,SINE2-1_AFC,LTR2_XT,CER9-I_CE,AmnSINE1_HS,DNA8-1_DEl,hATw-4_BF,Harbinger-6_PSt,HE1_HJ	#N/A	DNA Transposon	206189
Contig1320	6316	LTR	#N/A	DNA8-54_AP,Penelope-10_HM,Gypsy-50_PIT-I,L1-5B_EC,ATIS112A,I-5_AAe,REX1_FS,RTE-5_SP,Gypsy-3_Ano-I,ATCOPIA82_I,MER4BI,hAT-42_SM	#N/A	LTR	76971
Contig246	6100	DNA	#N/A	Gypsy-75_MLP-I,Gypsy3-I_AP,Crack-1_CS1,Vingi-1_APis,ISL2EU-5_HM,Tc1-7_Xt	#N/A	DNA Transposon	150925
Contig628	6053	Retro	#N/A	ROn-1_ON,Mariner-12_HM,Ginger2-1_AP,R7Ag2,hATm-1_HM,L1-1G_Cpo,Mariner-27_HM,HELITRONY1E,Polinton-1_XT,hAT-6_HM,Copia-5_PGr-LTR,CryptonS-6_PI,RMER16-int,Chapaev-10_HM	#N/A	Retro	45823
Contig25	6019	LTR	#N/A	Mariner-N3_DR,ISL2EU-7_HMa,CR1-61_HM,L2,ATIS112A,BEL-87_AA-I,DNA-8-5_DR	#N/A	LTR	393832
Contig168	5987	LINE	#N/A	RTE-1_GA,Chapaev-4_HMa,Chapaev3-5_PM,hATw-1_HM,Gypsy-15_PIT-I,P-9_HM,ERV1-N3-I_DR,EnSpm-12_HM,EnSpm-4N1_HM,Gypsy-124_MLP-I,Gypsy-35_DEl-I,hAT-31_HM,ATCOPIA61_I,Helitron-N1_SP	#N/A	LINE	110071
Contig72	5947	DNA	#N/A	Tc1-4Ory,MAUI,DM176,Gypsy-41_GA-LTR,I-6_AAe,Penelope-6_HM,Gypsy-30_GA-I,Sola2-4_NVi,ERV10_MD_I	#N/A	DNA Transposon	278729
R=220 (RR=213. TRF=0.015 NSEG=0.053)	5913	LTR	helitronORF	Helitron-2_DR,Helitron-1_SP,TOM_I,HEL,HAL1-3D_Cpo,Gypsy9-I_DR,hAT-67_HM	#N/A	LTR	339874
Contig335	5862	unclear	#N/A	Rex1-1_PM,REX1-2_XT,MER6,PIGGYB_SM,Copia1-I_DM,ERV1-1_OC-I,TE-X-5_DR,Gypsy-11_XT-I,Gypsy15-I_CR,Proto1-4_NG,Gypsy5-NVi_I	#N/A	unclear	20601
R=154 (RR=149. TRF=0.331 NSEG=0.058)	5805	LTR	#N/A	AF102576,Gypsy-7N_PPa-LTR	#N/A	LTR	472863
Contig1403	5780	DNA	#N/A	DM176,MAUI,DIRS-2_MLP-I,Sola2-5_AAe,Polinton-3_HM,L2_AC_7,Gypsy1-SM_I,Daphne-6_SPu,Helitron-7_NVi,CACTA-1_Dpulex,Tc1-4Ory,L1-2B1_Cho,DNA3-23_PSt	#N/A	DNA Transposon	80004
R=214 (RR=207. TRF=0.109 NSEG=0.094)	5703	LTR	LINE	Rex1-1_PM,Gypsy-28_GA-I,XMTX1_LTR,TZF28C,R1E_NGi,Gypsy-82_CQ-I,Gypsy149-I_DR,Transib-7_AAe,DNA-2-2_HM,MER106	#N/A	LTR	353973
Contig1661	5670	DNA	#N/A	LIN15_SM,TIR23T5A_CE,hATx-23_SM,hAT-67_HM,L1-1_Dor,P-34_HM,TCA1_I,ONSATB	#N/A	DNA Transposon	250593
R=8849 (RR=8821. TRF=0.000 NSEG=0.107)	5508	LTR	#N/A	Gypsy-18_SI-I,hAT-N58_DR,Sola1-2_AP,RELIK-I,hATm-4_HM,hAT6-2_SP,Gypsy-30_AA-I,Mariner-2_SM,Gypsy120-I_DR,hAT-N22_DR,BEL-42_AA-I	#N/A	LTR	228971
R=293 (RR=285. TRF=0.000 NSEG=0.057)	5488	LTR	#N/A	HERO-2_BF,ATENSPM10,CER15-I_CE,Gypsy-27_DEl-I,Gypsy-91_MLP-I,L1-15_XT,Hopscotch_I,HELITRON4	#N/A	LTR	231522
R=9399 (RR=9369. TRF=0.014 NSEG=0.099)	5487	unclear	LINE	Rex1-1_PM,REX1-2_XT,MER6,PIGGYB_SM,ERV1-1_OC-I,TE-X-5_DR,Gypsy-9_SI-I,Gypsy-11_XT-I,Gypsy15-I_CR,Gypsy5-NVi_I	#N/A	unclear	122639
Contig1292	5406	Retro	#N/A	Gypsy-18_SI-I,hAT-N58_DR,Sola1-2_AP,RELIK-I,hATm-4_HM,hAT6-2_SP,Gypsy-30_AA-I,Mariner-2_SM,Gypsy120-I_DR,hAT-N22_DR,BEL-42_AA-I	#N/A	Retro	3707
Contig873	5349	LTR	#N/A	Gypsy-15_MLP-I,Gypsy-182_AA-I,POLINTN1_SM,AARA8_AG,Ylli,BEL-39_AA-LTR,BLTR_SS,Tc1-13_Xt,L1MB3_5	#N/A	LTR	72308
Contig224	5347	LINE	#N/A	Penelope4_XT,Penelope-11_HM,BRIDGE1_FR,Daphne-13_HMa,L1_AC_11,L1-2a_MD,Gypsy77-LTR_DR,PRIMA4_I,Gypsy-22-I_NVi,BEL-199_AA-I	#N/A	LINE	88453
Contig219	5336	LTR	#N/A	Rex1-3_FR,REX1-5_XT,REX1-1_GA,SINE2-1_GA,COPIA1-I_OS,REX1_FURC,L1-57_XT,GYPSOL_LTR,Tc1-4Ory,SINE3_AFC,Gypsy-36_OD-I,BEL-1_BMa-I	#N/A	LTR	106942
Contig529	5265	Retro	#N/A	GLT2_SM,Gypsy-4_DAn-LTR,ACCORD2_I,MuDR1x_AP,L2B_ME,EnSpm-4_HM	#N/A	Retro	277502
R=177 (RR=171. TRF=0.178 NSEG=0.379)	5260	LTR	#N/A	DNA-4-1_HM,HERO-2_BF,Merlin-1_Aplcal,ATCOPIA1I,HERV35I,BEL-2-I_NVi,GYPSY12A_LTR,BMSAT1,Rehavkus-1_TC,Daphne-56_HMa,Polinton-2_CB	#N/A	LTR	1439875
Contig1509	5254	DNA	#N/A	Kiri-14_AAe,Mariner1_GG,BEL18-LTR_DR,hAT-5_AP,L3,MMTV-int	#N/A	DNA Transposon	175249
R=67 (RR=66. TRF=0.041 NSEG=0.102)	5249	LTR	#N/A	SYNCLOSHP	#N/A	LTR	182656
Contig133	5195	DNA	#N/A	EnSpm1_DR,EnSpmN1_DR,hAT-67_HM,ISL2EU-7_HMa,Transib1_Dmoj,I_Ele15,L1-1_DV,EnSpm-3_DR,Daphne-13_HMa	T_213a,T_261	DNA, TR	81851
Contig1694	5171	unclear	#N/A	Rex1-1_PM,Tc1-13_Xt,CR1-25_DR,EnSpm-4_DR,Penelope-13_HM,TE-X-5_DR,MTAI,DIRS-18_XT	#N/A	unclear	305844
Contig2078	5128	LTR	#N/A	I-2_BM,Mariner-35_HM,MARINER8_CB,L2-4_XT,Gypsy-47_GA-I,Copia-7_ES-I,BEL-1N_AA-I,REX5	#N/A	LTR	114826
R=1564 (RR=1553. TRF=0.000 NSEG=0.071)	5113	LTR	#N/A	L1-15_DR	#N/A	LTR	48361
Contig343	5112	unclear	#N/A	MARNA,HAT1_DR,HATN15_DR,Gypsy-14_CQ-I,PALTTTAAA3,Harbinger-1_XT,MINIME_DN,TC2_FR5,ARNOLD2,AT9TSD1,DOC5_DM,SAT-1_PGr,CR1-10_HM,Ginger1-4_HM,Gypsy9-SM_LTR,CR1-4_NVi	#N/A	unclear	90531
Contig12	5099	LTR	#N/A	MAUI,REX5	#N/A	LTR	888424
R=116 (RR=114. TRF=0.183 NSEG=0.145)	5054	LTR	#N/A	Ginger1-7_HM,SINEL_SM,TABOR_DA-I,MARINER25_CB,VANDAL10	#N/A	LTR	534105
Contig792	5053	DNA	#N/A	hAT-67_HM,ISL2EU-1_HM,hATm-53_HM,EnSpm-13_HM,Gypsy-9_DVir-I,PIVE,hAT-39_HM,L1-2_Cho,piggyBac-1N1_XT	#N/A	DNA Transposon	31992
Contig760	5051	DNA	#N/A	HARBINGER,CR1-45_HM,Daphne-18_SP,Gypsy-199_AA-I,Loa-2_DEl,CR1-74_AAe	#N/A	DNA Transposon	24921
Contig532	5023	DNA	#N/A	SCAR_MA,Sola3-1_BF,DNA-8-26_DR,Crack-2_BF,ERVB4_1-I_MM,I-9B_AAe,PrD37E,L2B-4_CQ	#N/A	DNA Transposon	314617
Contig1017	4850	DNA	#N/A	EhRLE2,Copia12-NVi_I,RMER12B,Mariner-32_HM,CR1_Ele19,L2-2_XT,Helitron-1_SMo,Gypsy-601_AA-I	#N/A	DNA Transposon	127023
R=608 (RR=599. TRF=0.000 NSEG=0.088)	4845	LTR	#N/A	L2B-2_CQ,Copia-1_AC-I,Gypsy-53_AA-I	T_213a,T_213b,T_261	LTR	603452
R=3124 (RR=3111. TRF=0.010 NSEG=0.291)	4786	LINE	LINE	L1-3_DR,L1PB2c,L1,Zator-N1B_CQ,TABOR_I,L1-22_ACar,L1-3_XT,L1-57_XT,L2_Plat1b,BEL-8_GA-I,Gypsy-137_AA-I,L2-9_DRe	#N/A	LINE	107738
R=1419 (RR=1408. TRF=0.035 NSEG=0.178)	4782	LTR	#N/A	Penelope-6_XT,L1-5_DR,Mariner-31_SM,Tx1-9_BF,L1_AC_15,ACROBAT1,FUGUREP2,hAT-43_HM,RTEX-2_ACar	#N/A	LTR	89810
Contig216	4769	LINE	#N/A	L1-3_DR,L1PB2c,L1,Zator-N1B_CQ,L1-22_ACar,L1-3_XT,L1-57_XT,CR1-77_HM,L2_Plat1b,BEL-8_GA-I,Gypsy-137_AA-I,L2-9_DRe	#N/A	LINE	10121
Contig550	4753	LINE	#N/A	KibiTn1,Tx1-5_FR,Gypsy19-LTR_Dya,Gypsy-162_AA-I	#N/A	LINE	70971
Contig220	4688	DNA	#N/A	Tc1-14_Xt,hAT-28_HM,Homo6,Kolobok-13_HM,L1MD3	#N/A	DNA Transposon	71309
Contig45	4599	LTR	#N/A	RTE-1_GA,Chapaev-19_HM,MAUI,Gypsy-86_AA-I,HAL1,CR1-98_AAe,Polinton-1_TV,DNA-TTAA-2_CQ,hATm-9_HM	#N/A	LTR	85928
Contig493	4598	DNA	#N/A	COPIA2-I_OS	#N/A	DNA Transposon	37518
Contig933	4568	DNA	#N/A	CR1-79_HM,ISL2EU-1_CS,Ag-L1-5,Harbinger-5_XT,DNA8-38_AP,LOA_Ele3B_AAe,CR1_Ele12	#N/A	DNA Transposon	42411
R=29 (RR=28. TRF=0.064 NSEG=0.104)	4533	LTR	#N/A	SAT_LM,TguERVK6	Sat_LM, Sat_Unk	TR	874086	CEN
R=377 (RR=369. TRF=0.023 NSEG=0.080)	4531	LTR	#N/A	HELITRON10_CB,Polinton-1_SM,L2-8_NVi,L1M2C_5,BEL-4_CQ-LTR,EnSpm-N1_OS	#N/A	LTR	110961
Contig10	4518	LTR	#N/A	ATHILA4C_I,hAT-N23_DR	#N/A	LTR	311234
Contig614	4450	LTR	#N/A	DNA2-8_AP,Cre-1_BM,GIZMO2_EI,RTEX-6_BF,Copia-1_GDe-I,L1_Carn5_5end	#N/A	LTR	46721
Contig1421	4443	LTR	#N/A	Gypsy-19_GA-I,Gypsy-50_GA-I,DM176,ACCORD_I,GYPSY3-I_CB,Gypsy-46_GA-I	#N/A	LTR	45259
R=5276 (RR=5256. TRF=0.016 NSEG=0.068)	4410	LTR	LINE	RTE-1_GA,Chapaev-19_HM,MAUI,Gypsy-86_AA-I,HAL1,Polinton-1_TV,DNA-TTAA-2_CQ,hATm-9_HM	#N/A	LTR	192349
Contig2162	4368	LTR	#N/A	DNA-X-7_DR,Ginger2-1_HM,Copia-6_Ano-I,DNA2-9_CB,piggyBac-2_XT,CHARLIE6,Gypsy-115_AA-I	#N/A	LTR	423642
R=97 (RR=95. TRF=0.180 NSEG=0.086)	4350	DNA	#N/A	DM176,HERV35I,HERV23,EnSpm-2N1_HM,PROTOP,DNA2-25_CB,L1MC4,CACTA-1_CapOwc	#N/A	DNA Transposon	227154
R=20 (RR=20. TRF=0.009 NSEG=0.046)	4344	LINE	LINE	MAUI	#N/A	LINE	1246168
Contig163	4321	LINE	#N/A	KoshiTn1,Copia-5_DWil-I	#N/A	LINE	127067
Contig2117	4314	DNA	#N/A	Polinton-1_EI,Rehavkus-3_TC,EnSpm-1_AA,ERV1-2N-EC_I,BEL-25_CQ-I,Polinton-2_HM,MER69B	#N/A	DNA Transposon	95480
Contig1776	4308	DNA	#N/A	Polinton-1_DAn,Sola1-11_AP,DIRS-24_XT,ATCOPIA65_I,Gypsy-1-I_MI	#N/A	DNA Transposon	68222
R=6959 (RR=6935. TRF=0.016 NSEG=0.087)	4297	DNA	#N/A	MAUI,RMER16-int,Sola2-6_HM,Copia-23_MLP-I,EnSpm-14_OS,LTR9_OG,DNA6-1_MLP,Polinton-3_HM	#N/A	DNA Transposon	1437580
Contig1584	4255	DNA	#N/A	BEL24-I_DR,P-6_HM,Ambal-3N1_FCy,DNA8-109_AP,ERV1-5-I_XT,Gypsy-24_GA-LTR,Gypsy134-LTR_DR	#N/A	DNA Transposon	250461
Contig1094	4246	LTR	#N/A	R2Ol-A,Tc1-2Xt,ERV1-1_ET-I,MDG1_LTR,CR1-2_FR,LTR72	#N/A	LTR	116582
Contig611	4238	LTR	#N/A	REX1_FS,MER6,ONSATB,SINE_TE,Copia-40_PIT-I,Gypsy1-LTR_Dya,Academ-2_BF,CR1-2_FR	#N/A	LTR	277686
Contig306	4228	LTR	#N/A	MAUI,Tc1-2_Xt,Copia-1_DPer-LTR,HERV17,LmeSINE1b,Daphne-18_HM,ERV22_MD_LTR,ATCOPIA47_I	#N/A	LTR	417309
Contig136	4176	unclear	#N/A	CR1-78_AAe,I-7C_AAe,Gypsy11-NVi_I,DNA-2-31_DR,Gypsy127-I_DR,BEL4a_Cis_I,DNA-8-29_DR	#N/A	unclear	281360
R=1429 (RR=1418. TRF=0.018 NSEG=0.094)	4168	LTR	#N/A	BEL19-I_AG,DNA-2-12_DR,BEL-1_RP-I,Tx1-3_BF	#N/A	LTR	40776
Contig1944	4144	LTR	#N/A	L1-3_VC,DM176,Helitron-N1_SP,TC1_FR1,DIRS-46_XT	#N/A	LTR	72805
R=1247 (RR=1236. TRF=0.000 NSEG=0.076)	4129	LTR	#N/A	DNA8-66_AP,Gypsy-1-I_MI,Gypsy-83_CQ-I	T_213a,T_213b,T_261	TR	998693
R=117 (RR=115. TRF=0.021 NSEG=0.139)	4108	DNA	#N/A	hATm-45_HM,MuDR9x_AP,Gypsy-206_AA-I,Gypsy-24-LTR_XT,PiggyBac-2_HM,hAT-43_HM,MuDR-1_DEl,Gypsy-14_XT-I,Gypsy60-LTR_DR,MER21	#N/A	DNA Transposon	191096
R=17 (RR=17. TRF=0.047 NSEG=0.153)	4062	LTR	#N/A	ONSATB,Ginger1-2_HM,Sola2-4_NVi	Asian_seabass_ONSAT_SB	TR	841599
Contig803	4061	DNA	#N/A	hAT-11_SM,STALKER4_I,MuDr-4_HM,BEL-43_AA-I,DNA3-4_MLP	#N/A	DNA Transposon	36523
R=805 (RR=795. TRF=0.000 NSEG=0.093)	4056	LTR	LINE	MAUI,TV1I,QUASIMODO2-I_DM,Helitron-2_DR,Transib1,HAL1-3D_Cpo,hAT-43_HM,ISL2EU-6_HM,Gypsy-264_AA-I,Gypsy-74_CQ-I	#N/A	LTR	82487
Contig2615	4053	LTR	#N/A	Rehavkus-1_HR,Sola1-2_AP,REX1_FURC,VANDAL12,Harbinger2-1_TSt,CryptonS-12_PI,BEL-5-I_HM	#N/A	LTR	27580
Contig2107	4042	LTR	#N/A	RTE-1_GA,REX3,TDD-5,P-4_HM,Daphne-24_HMa,hAT-53_HM,HELITRONY1C,Proto2-5_CS1,Gypsy-10_AC-I	#N/A	LTR	53778
Contig132	4008	LTR	#N/A	Penelope-5_XT,Penelope-6_XT,MAX_I,ACROBAT1	#N/A	LTR	142895
R=9528 (RR=9498. TRF=0.033 NSEG=0.110)	4005	LTR	#N/A	MAUI,REX1-1_GA,Rex1-2_PM,Gypsy-1_DFa-I,DNA8-89_AP,Chapaev-9_HM	#N/A	LTR	94074
Contig305	3990	LTR	#N/A	MAUI,REX1-1_GA,Rex1-2_PM,Gypsy-1_DFa-I,DNA8-89_AP,Chapaev-9_HM	#N/A	LTR	60624
R=322 (RR=314. TRF=0.000 NSEG=0.043)	3964	unclear	#N/A	RTEX-1_CR,Ginger1-2_AP,MULV,BEL-605_AA-I,L1-BT	#N/A	unclear	1558145
Contig1126	3923	LINE	#N/A	KibiTn1,MAUI,hAT-N26_DR	#N/A	LINE	66568
Contig375	3877	DNA	#N/A	hATw-4_BF,BEL-5-I_HM,piggyBac4_SP,Chapaev-19_HM	#N/A	DNA Transposon	189698
R=1117 (RR=1106. TRF=0.000 NSEG=0.018)	3867	unclear	LINE	Helitron-2_DR,Helitron-1_SP,Urukhai_Cis,Gypsy-22_DWil-I,Gypsy9-I_DR,RTE-14_SP,CR1-Y_Pass	#N/A	unclear	53193
Contig772	3858	unclear	#N/A	LX5b,ERE1_EH,Gypsy-18-I_NVi	#N/A	unclear	16840
Contig820	3842	DNA	#N/A	hAT-29_SM,L1-14_XT,LIN3_SM,Gypsy7-I_Dya	#N/A	DNA Transposon	136046
R=446 (RR=437. TRF=0.229 NSEG=0.082)	3826	LTR	#N/A	B2_Rn2,CryIIB,Gypsy-187_AA-I	#N/A	LTR	137400
Contig1826	3780	DNA	#N/A	RTE-1_GA,HERVIP10FH,BEL14-I_DR	#N/A	DNA Transposon	75297
R=1237 (RR=1226. TRF=0.000 NSEG=0.097)	3770	DNA	#N/A	QUASIMODO_I,Copia-27_MLP-I,MAUI	#N/A	DNA Transposon	44615
Contig747	3746	LINE	#N/A	L1_Lme,piggyBac-10_SM,Gypsy-619_AA-I,BEL-605_AA-LTR,EnSpm-16_HM	#N/A	LINE	32476
Contig181	3742	LTR	#N/A	Gypsy-11_GA-I,Gypsy-29_GA-I,U02455,GYPSY3I_DR,ZAM_I	#N/A	LTR, gypsy	139709
Contig665	3736	LINE	#N/A	ERV2-3_Opr-I,Gypsy3-I_Dpse,Daphne-6_SPu,Gypsy-7_DEl-I,CR1-30_DR,Transib1_NVi	#N/A	LINE	418612
Contig33	3732	unclear	#N/A	MER6A,TRE3D,Gypsy-215_AA-I,SMAR2,Tx1-2_BF,PNL_SM,Gypsy63-LTR_DR,DIRS-14_DR	#N/A	unclear	94471
Contig1895	3692	unclear	#N/A	DNA4-7_AP,MER34B_I,Chapaev-17_HM,HELITRON1	#N/A	unclear	53205
Contig350	3661	DNA	#N/A	MER6,TOL2_OL,R4-1_TCa,ATHAT10,MER2B,L1_AC_13,SINE_TE,Polinton-1_TC,Novosib-6_CR	#N/A	DNA Transposon	235784
Contig2279	3649	DNA	#N/A	Gypsy-47_GA-LTR,XXU01086,Ginger1-2_AP,Rehavkus-1N1_HR,ERV1-4-EC_I,L1MA7	#N/A	DNA Transposon	400701
Contig759	3632	DNA	#N/A	HMSBEAGLE_I,Gypsy-17_XT-I,Gypsy-170-I_DR,Gypsy-10_AC-I	#N/A	DNA Transposon	45991
Contig334	3612	LINE	#N/A	L1-56_XT,MER57A_I,TOL2_OL,HELITRON4,HUERS-P3B,hAT-N53_DR	#N/A	LINE	155421
R=1375 (RR=1364. TRF=0.000 NSEG=0.092)	3612	DNA	#N/A	TC1_FR1,Tc1-4Ory,Transib-11_HM,hATm-55_HM,EnSpm-8_HM,BEL-4_DPu-I,Gypsy-1-I_MH,HAL1B,TE-X-1_NVi,Tc1-2Xt,L2B-4_AAe	#N/A	DNA Transposon	70699
Contig1794	3603	LINE	#N/A	Polinton-1_DEl,Crack-17_BF,Gypsy-207_AA-LTR,Gypsy-9-I_XT,Daphne-65_HMa,Polinton-2_CB,L2_AC_9,hATN-4_ACar,Penelope2_XT	#N/A	LINE	21854
Contig1499	3597	LINE	#N/A	ONSATB,MAUI,HETRP_DM,L1_AC_7,L1M2_5,Chapaev-N1_AAe,TRANSIB3,L1-12_DR,REX5	#N/A	LINE	242078
Contig134	3560	unclear	#N/A	Tc1-17a_Xen,CHARLIE5,P-30_HM,Polinton-1_HM,MDR1,ERV7_MD_I,Gypsy13-I_DR,CATCH1I_DR	#N/A	unclear	444520
Contig1574	3558	Retro	#N/A	ERV3_MD_I,SZ-10_I,GGLTR11_I,L1_AC_15	#N/A	Retro	88410
Contig258	3544	LTR	#N/A	L1MAB_EC,BEL-234_AA-I	#N/A	LTR	90721
Contig129	3528	LINE	#N/A	Gypsy-6_PPa-I,MuDR9x_AP,Gypsy-206_AA-I,Gypsy-24-LTR_XT,Gypsy-10_OD-I,hAT-43_HM,ISL2EU-2_CS,Gypsy-177_AA-I,MuDR-1_DEl,Gypsy-14_XT-I,Gypsy-75_MLP-I	#N/A	LINE	129800
Contig252	3517	LINE	#N/A	L2,PBM272,Helitron-1_SMo,Penelope-7_HM,Crack-9_BF,EnSpm1_DR,piggyBac-N6_SP,L1-3_HM,LTR82_MD_I	#N/A	LINE	119632
R=10663 (RR=10623. TRF=0.009 NSEG=0.057)	3499	LTR	gypsy	Gypsy-11_GA-I,Chapaev-3B_HM,Polinton-2_HM,Chapaev-8_HM	#N/A	LTR	25876
Contig1947	3481	LTR	#N/A	Gypsy-11_GA-I,Chapaev-3B_HM,Polinton-2_HM,Chapaev-8_HM	#N/A	LTR	6749
Contig1163	3479	LTR	#N/A	DNA-TA-4_DR,BURDOCK_I	#N/A	LTR	135778
Contig553	3470	LINE	#N/A	RTE-1_GA,EXPANDER2,Rehavkus-1_TC,MYSERV6,Gypsy-100_MLP-I,CACTA-I,MER69C,ROn-2_ON,Gypsy-9_OD-I,LTR11B2a9_EE	#N/A	LINE	40758
Contig2816	3427	DNA	#N/A	DNA-2-3_HM,Penelope-12_XT,L1-3_PVa,Chapaev-11_HM,ATHILA6C_I,L1-2a_MD	#N/A	DNA Transposon	170707
Contig425	3425	unclear	#N/A	TCB2,I-56_AAe,Kolobok-1_XT	#N/A	unclear	125596
Contig434	3425	DNA	#N/A	piggyBac-4_SM,Outcast-1_DEl	#N/A	DNA Transposon	331026
Contig1845	3417	DNA	#N/A	hAT-76_HM,EnSpm-N2_DR,hAT-80_HM,GYPSY2_I	#N/A	DNA Transposon	238387
R=1972 (RR=1961. TRF=0.198 NSEG=0.109)	3374	DNA	#N/A	piggyBac-2_XT,MOGWAI1_EI	#N/A	DNA Transposon	76825
Contig1815	3367	DNA	#N/A	Tx1-17_BF,DOC3_DM,Tigger15a,Kiri-38_AAe,TCA2_I	#N/A	DNA Transposon	52199
Contig549	3358	LINE	#N/A	POLINTN1_SM,R1B_DAn	#N/A	LINE	230156
R=5713 (RR=5693. TRF=0.000 NSEG=0.066)	3357	LINE	#N/A	CR1-61_HM,HAL1-1H_Cpo,ATIS112A,Sadhu3-2	#N/A	LINE	143788
Contig2831	3333	DNA	#N/A	Tc1-17a_Xen,SINE2-1_AFC,SINE2-1_GA,CR1-86_HM,Penelope1_XT	#N/A	DNA Transposon	210885
R=2949 (RR=2936. TRF=0.000 NSEG=0.066)	3326	Retro	#N/A	CR1-61_HM,ATIS112A,Sadhu3-2	#N/A	Retro	11091
Contig245	3318	DNA	#N/A	Tc1-15_Xt,BARI_DM,CR1-12_HM,Chap3a_Cis,CryptonI-1_CQ,TC1_FR2	#N/A	DNA Transposon	70334
Contig1372	3264	Retro	#N/A	Gypsy-29_GA-I,Gypsy-43_GA-I,ROVER_DM,HATN16_DR,Gypsy1-I_DM,Gypsy104-I_Dr,MER58C	#N/A	Retro	55310
Contig2079	3254	LINE	#N/A	CryptonS-19_PI,Gypsy14-I_SP,HERV17,P-2_AP,hATm-13_HM	#N/A	LINE	32627
R=5166 (RR=5146. TRF=0.000 NSEG=0.080)	3247	DNA	#N/A	Kiri-14_AAe,Mariner1_GG,CR1-30_DR,L3,BEL-1_DAn-I	#N/A	DNA Transposon	380
Contig176	3231	DNA	#N/A	Transib1,BBSINE1,DIRS-4_XT,TguERV6_I	#N/A	DNA Transposon	46457
Contig150	3229	LINE	#N/A	hAT-80_HM,PIGIBAKKU,OSLINE1_1,Copia-111_AA-I,Mariner-24_HM,TguLTRK1_I,BEL-88_AA-I	#N/A	LINE	104442
Contig476	3217	unclear	#N/A	ERV45_MD_I,Kiri-32_AAe,BEL-111_AA-I	#N/A	unclear	16031
Contig1566	3216	unclear	#N/A	hATw-1_LB,Merlin9_SM,Gypsy-6_BM-I	#N/A	unclear	7576
R=728 (RR=718. TRF=0.000 NSEG=0.088)	3216	LTR	#N/A	Helitron-1_DR,ERV1-3-EC_I,Gypsy-51_MLP-I	#N/A	LTR	67920
Contig96	3208	LINE	#N/A	Ves2_ML,HERV17,LTR16P_ML	#N/A	LINE	43195
Contig972	3199	DNA	#N/A	TE-2-1_DR,GIZMO2_EI,Perere_Smed,L1-1F_Cpo	#N/A	DNA Transposon	12755
Contig730	3198	DNA	#N/A	Gypsy-16_DWil-I,Helitron-2_NVi	#N/A	DNA Transposon	91855
Contig651	3183	DNA	#N/A	ATGP3A_I,Gypsy-4_SI-I,DGLT-A1_I,LTR1A3_OG	#N/A	DNA Transposon	54118
Contig1415	3179	DNA	#N/A	Chapaev-6_HM,GYPSY56-I_AG,HELITRON2_AG,L2-9_DRe	#N/A	DNA Transposon	31572
Contig2521	3173	DNA	#N/A	Gypsy-604_AA-I,Gypsy-50_PIT-I	#N/A	DNA Transposon	16646
Contig161	3158	DNA	#N/A	LOA-10_AAe,ZAM_I,L1-3_TS	#N/A	DNA Transposon	30315
Contig2578	3133	unclear	#N/A	hAT-40_SM,Gypsy-245_AA-I,TART_DV,GYPSY9_I,Zator-2_Hrobusta,Polinton-2_TC,Gypsy-202_AA-LTR	#N/A	unclear	175512
R=777 (RR=767. TRF=0.000 NSEG=0.132)	3124	DNA	#N/A	MER6,Gypsy-5_DEr-LTR,Gypsy8-I_AP,CR1-J1_Pass	#N/A	DNA Transposon	123370
Contig149	3121	LTR	#N/A	Gypsy-30_GA-I,PRIMAX_I,Chapaev-13_HM,RNERVK8c,P-37_HMa,Nimb-1_DR,Poseidon-5_HM	#N/A	LTR	95257
Contig1789	3121	Retro	#N/A	Rex1-1_PM,Tc1-2Xt,Rex1-2_PM,SINE_TE,Tc1-4Ory,L1-3_MD,G5_DM	#N/A	Retro	308758
Contig234	3111	DNA	#N/A	CR1-J1_Pass,Gypsy1-I_GA	#N/A	DNA Transposon	14478
Contig762	3100	DNA	#N/A	Gypsy-54_DEl-I,CR1-4_DEl,Gypsy-39_GA-I,L2-2_Cis,Mariner-16_SM,Galileo_DM	#N/A	DNA Transposon	50075
Contig843	3092	DNA	#N/A	ISL2EU-1_CS	#N/A	DNA Transposon	49373
R=465 (RR=456. TRF=0.000 NSEG=0.091)	3092	DNA	#N/A	EnSpm-4_DR,Tc1-1Neo,CR1-3_HM,piggyBac-17_SM,Gypsy-206_AA-I,Polinton-2_SM,CR1_GD,VANDAL13,CR1-74_HM,Copia-30_DPu-I	#N/A	DNA Transposon	127286
R=466 (RR=457. TRF=0.159 NSEG=0.112)	3036	Retro	#N/A	MDG3_DM,Harb_Cis1,CRATA,hATm-47_HM	#N/A	Retro	63757
R=1210 (RR=1199. TRF=0.243 NSEG=0.114)	3021	DNA	#N/A	hAT-80_HM,ZAM_I,L1-2_DR,Gypsy-52_AA-I	#N/A	DNA Transposon	54264
Contig1552	3012	DNA	#N/A	DIRS-26_XT,Crack-29_AAe,RTE-5_SP,DIRS-5_DR,Daphne-4_BF,Sola3-1_BF	#N/A	DNA Transposon	46003
R=10430 (RR=10393. TRF=0.000 NSEG=0.065)	3001	LINE	#N/A	LTR28_OC,hATN-4_ACar	#N/A	LINE
Contig1636	2983	DNA	#N/A	Daphne-56_HMa,Zator-1_HM,CR1-7_DR	#N/A	DNA Transposon	213273
Contig1915	2958	unclear	#N/A	hATx-23_SM,VANDAL13	#N/A	unclear	660233
Contig726	2946	LINE	#N/A	ACCORD2_I,EnSpm-15_HM,MAUI,RTEX-11_BF	#N/A	LINE	42897
Contig1248	2937	DNA	#N/A	Copia12-NVi_I,Gypsy-53_AA-I	#N/A	DNA Transposon	170256
Contig885	2933	Retro	#N/A	GYPSY11_I,L1P4c_5end	#N/A	Retro	15590
Contig1443	2927	LINE	#N/A	LTR28_OC	#N/A	LINE	10722
R=1022 (RR=1011. TRF=0.042 NSEG=0.098)	2926	unclear	#N/A	Crack-9_BF,Mariner-6_SM,DNA-8-32_DR,Poseidon_Ac,Gypsy3-I_Dmoj,Polinton-3_HM,Gypsy-177_AA-I	#N/A	unclear	48337
Contig471	2918	LINE	#N/A	MER6,L1-13_DR,DM176,hAT-5_HM	#N/A	LINE	159805
Contig573	2907	DNA	#N/A	SINE_TE,BARI1,LIN4b_SM	#N/A	DNA Transposon	27760
Contig179	2904	DNA	#N/A	Gypsy-41_GA-LTR,DNA-TA-1N_PPa,ERV10_MD_I	#N/A	DNA Transposon	67144
Contig857	2902	LTR	#N/A	MER6,Gypsy-16_LBS-LTR,TSE1_LTR,L1_AC_18,Gypsy-12_GA-I,ROn-2_ON	#N/A	LTR	175267
R=399 (RR=391. TRF=0.043 NSEG=0.134)	2900	Retro	#N/A	EnSpm-7_HM,MER6,Helitron-N1_DEl,HE1_HJ	#N/A	Retro	159821
Contig1763	2889	DNA	#N/A	PROTOP_B,Gypsy18-I_Dya,MMERVK10D3_I,TSESSEBEII	#N/A	DNA Transposon	101031
Contig1181	2887	LINE	#N/A	Gypsy-37_DAn-I,MER6A,SINE_TE	#N/A	LINE	44674
Contig1875	2876	LINE	#N/A	Tc1-10Xt,PFRP4,MuDR-5_OS,Helitron-1_BM,BEL2_MH-I	#N/A	LINE	36664
Contig1841	2875	DNA	#N/A	ERV3-1N1-I_XT,Kolobok-1_FraCyl,Chapaev-3B_HM,Jockey-13_AAe,GYPSY7-LTR_AG,P-19_HM,Gypsy123-I_DR	#N/A	DNA Transposon	19994
Contig513	2869	LINE	#N/A	REX1-5_XT,hATm-13_HM,PiggyBac-6_HM	#N/A	LINE	63239
R=1009 (RR=998. TRF=0.000 NSEG=0.122)	2866	LINE	#N/A	MAUI,Polinton-1_DR,MuDR9x_AP,ATENSPM5,BEL-98_AA-LTR	#N/A	LINE	396066
Contig745	2858	DNA	#N/A	Daphne-24_HMa,Academ-3_BF,Mariner-29_HM,TguERV5_I,Ginger1-8_HM,Gypsy-41_AA-I,BEL-596_AA-I	#N/A	DNA Transposon	12755
Contig742	2850	DNA	#N/A	MDG1_I,Sola2-2_HM,L1-1C_Cpo	#N/A	DNA Transposon	20508
Contig65	2849	DNA	#N/A	Gypsy-31-I_NVi,SPMLIKE,BEL-199_AA-I,Gypsy-101_AA-I,Kolobok-5_TV	#N/A	DNA Transposon	150868
R=342 (RR=334. TRF=0.000 NSEG=0.052)	2840	LTR	#N/A	tRNAGlyGGC_CB,tRNA-Val-GTA,hATm-12_HM	#N/A	LTR	54879
Contig1044	2833	DNA	#N/A	TC1DR3	#N/A	DNA Transposon	24140
Contig592	2827	DNA	#N/A	BATUMI_I,Harbinger-5_PGr,IAP5-Mm_I	#N/A	DNA Transposon	17683
Contig594	2811	LINE	#N/A	ROn-1_ON,Tc1-2Xt,REX1_FURC,Poseidon-6_HM,PRS423,LTR53C_MD,MDG1_LTR,Ginger2-1_HM,AeBuster1	#N/A	LINE	86116
Contig736	2809	DNA	#N/A	#N/A	#N/A	DNA Transposon	15111
Contig1940	2795	DNA	#N/A	ONSATB,hAT-11_HM,Gypsy-37_CQ-I,LTR155b_MD,hAT-76_HM	Asian_seabass_ONSAT_SB	DNA Transposon	540907
R=9307 (RR=9278. TRF=0.000 NSEG=0.106)	2785	DNA	#N/A	hAT-27_SM,Gypsy-22_CQ-I,HMSBEAGLE_I	#N/A	DNA Transposon	13017
R=1151 (RR=1140. TRF=0.010 NSEG=0.134)	2769	LINE	#N/A	Gypsy-6_PPa-I,MuDR9x_AP,Gypsy-206_AA-I,hAT-43_HM,ISL2EU-2_CS,Gypsy-177_AA-I,MuDR-1_DEl,Gypsy-14_XT-I,Gypsy-75_MLP-I	#N/A	LINE	76412
Contig756	2765	DNA	#N/A	hAT-27_SM,Gypsy-22_CQ-I,HMSBEAGLE_I	#N/A	DNA Transposon	134
Contig2089	2763	Retro	#N/A	CR1-62_HM,Vingi-1_SPur,DIRS-37_XT,TART_DV,Gypsy-30_AA-I	#N/A	Retro	30025
Contig159	2757	LINE	#N/A	#N/A	#N/A	LINE	65485
Contig761	2756	DNA	#N/A	CR1-54_HM,Sola3-2N1_CB,hAT-1_TV	#N/A	DNA Transposon	11026
Contig358	2752	LINE	#N/A	P-3_Hrobusta	#N/A	LINE	101252
Contig1767	2748	DNA	#N/A	TRANSIB2,SMAR6,P-28_HM,CR1-71_HM,EnSpm-8_HM	#N/A	DNA Transposon	122362
R=941 (RR=930. TRF=0.000 NSEG=0.029)	2747	LTR	#N/A	Kiri-2_DEl,Polinton-2_HM,DIRS-7_DR,DNA-2-4_DR,Gypsy-35_NVi-I	#N/A	LTR	22795
Contig1924	2739	DNA	#N/A	Ginger1-3_HM,Gypsy-182_AA-I,Gypsy-18_SMo-I,Mariner-7_HM,Sola1-N1_CQ,DNA8-98_AP	#N/A	DNA Transposon	25819
Contig1003	2735	DNA	#N/A	GYPSY11_I,ERV11_MD_I,hAT-1_TCa	#N/A	DNA Transposon	14615
Contig750	2725	DNA	#N/A	DONG_FR2,Rex6,Ambal-3N1_FCy,Gypsy-15_OD-LTR,BEL4-I_DR,Gypsy-18_SMo-I,ERV1-4-EC_I,L1MEC_5	#N/A	DNA Transposon	38059
Contig1269	2724	DNA	#N/A	HERVP71A_I,P-15_HM,MARINER10_CB	#N/A	DNA Transposon	11259
Contig563	2706	LTR	#N/A	EnSpm-7_HM,Gypsy-50_CQ-I	#N/A	LTR	112752
Contig1602	2698	LINE	#N/A	RTE-2_BF,Charlie-Galluhop,hATx-6_SM	#N/A	LINE	42611
R=2537 (RR=2524. TRF=0.000 NSEG=0.064)	2689	Retro	#N/A	MER6,Gypsy-52_AA-I,Helitron-N1_DEl,HE1_HJ	#N/A	Retro	87600
Contig1689	2688	DNA	#N/A	TguLTRK2e_I,ISL2EU-7_HMa,CR1-69_HM,Helitron-1_AC	#N/A	DNA Transposon	135920
Contig1666	2671	DNA	#N/A	Polinton-2N1_DR,Transib-14_HM	#N/A	DNA Transposon	10934
Contig512	2670	LINE	#N/A	Gypsy-6_RP-I,L1-2_Tbel	#N/A	LINE	73362
Contig1360	2668	LINE	#N/A	Tc1-2Onc,hAT-2_XT,DNA-8-5_DR,Gypsy-24_BG-I	#N/A	LINE	52725
Contig182	2666	LINE	#N/A	Mariner-29_SM,Crack-33_AAe,Mariner-N2_DR	#N/A	LINE	5248
Contig1873	2666	LINE	#N/A	#N/A	#N/A	LINE	51364
R=9937 (RR=9904. TRF=0.000 NSEG=0.017)	2660	LINE	#N/A	#N/A	#N/A	LINE	15259
R=1519 (RR=1508. TRF=0.000 NSEG=0.056)	2652	LINE	#N/A	MER6,Helitron-N1_DEl,HE1_HJ	#N/A	LINE	11727
Contig2003	2630	Retro	#N/A	DM297_I	#N/A	Retro	28175
Contig309	2627	unclear	#N/A	L1_AC_10,Helitron-N1_SP	#N/A	unclear	57697
Contig757	2618	unclear	#N/A	CR1-10_HM,Gypsy-264_AA-I,ERV47_MD_I	#N/A	unclear	13489
R=395 (RR=387. TRF=0.028 NSEG=0.154)	2617	LTR	cacta	L1-3_DR,Chap2_Xt,5S_DM,hAT-21_SM,DIRS1_DR,hATw-1_SP	5SrDNA	5SrDNA, LTR	6427
Contig2	2581	unclear	#N/A	COPIA_DM_I,QUASIMODO_I,HERV23,Zator-1_HRo	#N/A	unclear	580586
Contig1283	2580	Retro	#N/A	Mariner-2_ACar,DNA-X-12_DR,Polinton-2_HM	#N/A	Retro	16372
R=4831 (RR=4812. TRF=0.000 NSEG=0.045)	2579	Retro	#N/A	ATENSPM10,ERV32_MD_I,L1-15_XT	#N/A	Retro	67890
Contig419	2569	DNA	#N/A	R5-1_SM,BEL-129_AA-I,HERV15I	#N/A	DNA Transposon	226682
R=765 (RR=755. TRF=0.000 NSEG=0.022)	2566	LTR	LINE	MAUI,L2-1_DR,Gypsy-45_DEl-I	#N/A	LTR	74924
R=7521 (RR=7497. TRF=0.000 NSEG=0.009)	2565	LINE	#N/A	#N/A	#N/A	LINE
Contig1986	2549	LTR	#N/A	hATw-2_HM	#N/A	LTR	53966
R=10392 (RR=10355. TRF=0.000 NSEG=0.000)	2542	LINE	#N/A	Polinton-2_TC	#N/A	LINE	22687
R=1455 (RR=1444. TRF=0.226 NSEG=0.076)	2539	Retro	#N/A	INVADER2_I,HERV23,Gypsy-44_AA-I	#N/A	Retro	132089
R=1623 (RR=1612. TRF=0.000 NSEG=0.163)	2531	Retro	#N/A	Mariner-4_HM,Gypsy-134_AA-I,Mariner-12_HM,Ginger2-1_AP,Mariner-1_NGr,L1-1G_Cpo,Copia-5_PGr-LTR	#N/A	Retro	14706
R=1754 (RR=1743. TRF=0.011 NSEG=0.090)	2531	DNA	#N/A	ONSATB,Ginger1-2_HM	Asian_seabass_ONSAT_SB	TR	1128488
R=927 (RR=916. TRF=0.000 NSEG=0.000)	2531	DNA	#N/A	BEL-10_DAn-I,ERV2-2_CHo-I	#N/A	DNA Transposon	30588
R=874 (RR=863. TRF=0.029 NSEG=0.110)	2518	DNA	mariner	Tc1-2Xt,Mariner-7_HM,hATm-3_AA,CR1-15_HM,Daphne-56_HMa,Helitron-3N1_NVi,Gypsy-14_XT-I	#N/A	DNA Transposon	57909
Contig367	2497	LINE	#N/A	L1-2_SP	#N/A	LINE	56072
Contig490	2497	DNA	#N/A	PNL_SM,SMARN4	#N/A	DNA Transposon	34047
Contig1201	2492	unclear	#N/A	Gypsy-59_PIT-LTR,CVE,VANDAL14,AF025843,hAT-33_SM	#N/A	unclear	60136
Contig931	2478	Retro	#N/A	DNA-2-2_HM	#N/A	Retro	90295
Contig795	2454	DNA	#N/A	LTR1420_EC,Crack-4_CQ	#N/A	DNA Transposon	10039
R=2958 (RR=2945. TRF=0.000 NSEG=0.118)	2450	LTR	#N/A	P-10_HM	#N/A	LTR	10085
R=648 (RR=639. TRF=0.000 NSEG=0.047)	2447	DNA	#N/A	HOPPER_BD,AmnSINE1_HS,DNA-6-N7_DR,5S_CPo	5SrDNA	5SrDNA, DNA	42886
Contig1995	2446	DNA	#N/A	DNA-2-15_DR,Poseidon_Hyd,GYPSM1_I,Academ-4_BF	#N/A	DNA Transposon	15911
R=1512 (RR=1501. TRF=0.000 NSEG=0.162)	2445	DNA	#N/A	hAT-N31_DR,hATm-26_HM,HELITRON2,ACCORD2_I,BEL-611_AA-LTR,DNA-8-22_DR,Gypsy60-LTR_DR	#N/A	DNA Transposon	34859
Contig1341	2429	unclear	#N/A	#N/A	#N/A	unclear	183011
Contig786	2426	LINE	#N/A	REX3,hAT-45_SM,TZF28B,Tc1-3_FR,Polinton-1_XT,hAT-71_HM,HATN5A_DR	#N/A	LINE	29432
R=8535 (RR=8508. TRF=0.060 NSEG=0.137)	2422	DNA	#N/A	MER106B,P1_AP,Sola1-1_AC,BLASTOPIA_I,Polinton-2_SM	#N/A	DNA Transposon	142045
Contig2315	2421	LTR	#N/A	HERV17,MuDr-1_BF	#N/A	LTR	11618
Contig1993	2407	DNA	#N/A	hAT-4_XT,Gypsy-5_GA-I,Charlie12,GYPSY12A_LTR,Chap2_Xt	#N/A	DNA Transposon	54062
Contig1208	2403	DNA	#N/A	MER106B,P1_AP,Sola1-1_AC,BLASTOPIA_I,Polinton-2_SM	#N/A	DNA Transposon	3354
R=3336 (RR=3323. TRF=0.000 NSEG=0.030)	2402	LINE	#N/A	Merlin-2_Roryzae	#N/A	LINE	72687
Contig1502	2400	DNA	#N/A	hAT-1_DP,LOR1I,Gypsy-170-I_DR	#N/A	DNA Transposon	13049
R=200 (RR=194. TRF=0.347 NSEG=0.331)	2399	LTR	#N/A	QUASIMODO2-I_DM,DM176,hAT-N2_AP,hAT-11_HM,L1MC4,CACTA-1_CapOwc	#N/A	LTR	122557
Contig1593	2398	DNA	#N/A	Daphne-14_HMa,Copia-3_DAn-I,MER95,Copia-2_LBS-I	#N/A	DNA Transposon	31437
Contig71	2396	LINE	#N/A	ERV19_MD_I	#N/A	LINE	47538
Contig84	2395	DNA	#N/A	BEL-649_AA-LTR,SACI-7,Ginger-1_Chlorella_NC64A	#N/A	DNA Transposon	53244
Contig917	2393	LINE	#N/A	REX1-4_AFC,L2-2_Cis,Rex1-3_FR,LOOPERN5_DR	#N/A	LINE	283774
Contig1901	2391	DNA	#N/A	GLT2_SM	#N/A	DNA Transposon	36520
Contig810	2390	DNA	#N/A	Mariner-27_HM,Sola1-10_AP,Helitron-1_DYak,MuDr-1_HM,Poseidon-3_HM	#N/A	DNA Transposon	644793
R=4213 (RR=4196. TRF=0.461 NSEG=0.060)	2389	Retro	#N/A	Gypsy40-I_DR,CR1-57_AAe	T_213a,T_261	LTR, TR	2523121
Contig1000	2387	DNA	#N/A	L1-Y_CF	#N/A	DNA Transposon	157306
Contig58	2387	LINE	#N/A	hATw-1_HM,Tigger16a,DIRS-20_XT,Homo6	#N/A	LINE	37059
Contig814	2385	Retro	#N/A	REX1-8_XT,HELITRON2_OS,SMAR25	#N/A	Retro	42692
Contig2819	2380	LINE	#N/A	IAPEYI,L1_Carn2_orf2,CPSC5_I,Helitron-2_DR,Copia19-NVi_I	#N/A	LINE	22937
R=217 (RR=210. TRF=0.000 NSEG=0.051)	2375	DNA	#N/A	SZ-43LTR	#N/A	DNA Transposon	98900
Contig1989	2372	Retro	#N/A	CryptonS-22_PI,HERVIP10FH,ACCORD_LTR	#N/A	Retro	16475
Contig912	2363	LINE	#N/A	GYPSY5_I,MERLIN4_SM	#N/A	LINE	30881
Contig2119	2360	LINE	#N/A	TC1_PP,CR1-55_HM	#N/A	LINE	83758
Contig226	2352	LINE	#N/A	HERVIP10FH,MMETN,RT1	#N/A	LINE	47666
Contig228	2339	DNA	#N/A	XXU02425	#N/A	DNA Transposon	45087
R=4689 (RR=4671. TRF=0.000 NSEG=0.058)	2337	LTR	LINE	MAUI,Ginger2-1_LS	#N/A	LTR	58735
Contig1834	2334	LTR	#N/A	CryptonS-6_PI	#N/A	LTR	15005
Contig390	2333	DNA	#N/A	CACTA-1_AA,CR1-13_CQ,Gypsy-14_DWil-I,BEL-621_AA-I	#N/A	DNA Transposon	18698
Contig1244	2326	Retro	#N/A	RTE-1_GA,hAT-43_HM,L1-1b_Cis	#N/A	Retro	79029
R=10193 (RR=10158. TRF=0.000 NSEG=0.078)	2314	DNA	#N/A	EnSpmN1_DR,hAT-67_HM,ISL2EU-7_HMa,I_Ele15,Daphne-13_HMa,RSINE2	T_213a,T_261	TR	17023
Contig130	2311	LINE	#N/A	TC1_FR5,P-1N_HM,CR1-4_NVi	#N/A	LINE	63705
Contig1739	2303	DNA	#N/A	ACROBAT1,Rex1-1_PM,Hoana4,Polinton-2_HM,P-3_AP,HARLEQUIN	#N/A	DNA Transposon	20290
Contig307	2301	LTR	#N/A	MAUI,Ginger2-1_LS	#N/A	LTR	16105
Contig1468	2294	DNA	#N/A	Sola3-2_HM,DNA-8-24_DR,BEL-2_BMa-I	#N/A	DNA Transposon	54549
Contig339	2280	DNA	#N/A	SMAR31,TAS_I	#N/A	DNA Transposon	27641
Contig2051	2276	LINE	#N/A	HE1_DR1	#N/A	LINE	21741
R=5044 (RR=5024. TRF=0.000 NSEG=0.087)	2274	LINE	#N/A	Sola2-2_DPu	#N/A	LINE	13407
Contig1746	2273	LTR	#N/A	hAT-N53_DR	#N/A	LTR	15504
R=10713 (RR=10673. TRF=0.030 NSEG=0.155)	2267	LTR	#N/A	MER6A,Transib1,Copia-1_TMe-LTR,L1-4_HM	#N/A	LTR	48255
Contig752	2263	DNA	#N/A	Helitron3_PPa,Mariner-8_HM,LTR1B_Str,EnSpm-8_HM	#N/A	DNA Transposon	9323
Contig50	2249	LINE	#N/A	REX1-4_AFC,REX1_FS,CR1-30_DR,Copia-4_Ano-LTR,EnSpm-N1_OS	#N/A	LINE	156873
Contig44	2248	LINE	#N/A	Ginger1-1_AP,MULE1_EI,DIRS-20_XT,BEL-7_DAn-I	#N/A	LINE	34767
Contig361	2243	DNA	#N/A	CR1-79_HM,L1_AC_13,Gypsy-12_Ano-I,Polinton-1_TC,LOA_Ele4	#N/A	DNA Transposon	12689
R=10429 (RR=10392. TRF=0.000 NSEG=0.010)	2241	LINE	#N/A	Gypsy6-SM_I	#N/A	LINE	9207
Contig208	2236	LTR	#N/A	ENSPM5_OS,Howilli1,Gypsy-97_CQ-I,MARINER2_GT	#N/A	LTR	54379
Contig2134	2234	LTR	#N/A	Kolobok-2_HM	#N/A	LTR	21230
Contig1141	2230	LINE	#N/A	Ginger2-1_LS,RETROSAT6_I,Sola1-5_AP	#N/A	LINE	14040
Contig437	2224	LINE	#N/A	Tc1-4Ory	#N/A	LINE	98183
Contig282	2220	LINE	#N/A	Penelope-1_AFC,REX1_FURC,GLT2_SM,Penelope-5_XT,L2-68_HMa,REX1_CY	#N/A	LINE	142382
Contig273	2218	LINE	#N/A	DIRS-4_ACar,CR1-45_HM	#N/A	LINE	22470
R=443 (RR=434. TRF=0.000 NSEG=0.095)	2208	LINE	#N/A	COPIA1-I_OS,NOMAD_I	#N/A	LINE	94929
Contig1564	2194	DNA	#N/A	Penelope-7_XT,Jockey-N7_CQ,Gypsy-1-I_MI,BEL-631_AA-LTR	#N/A	DNA Transposon	11902
Contig877	2193	LTR	#N/A	REX3,LTR82_MD_I,RNLTR15A_LTR,Gypsy13-LTR_Dya,HERVIP10FH,Harbinger-5_XT	#N/A	LTR	312679
Contig2139	2190	Retro	#N/A	BEL-6-I_XT,BEL13-I_DR	#N/A	Retro	10280
R=794 (RR=784. TRF=0.000 NSEG=0.024)	2187	LINE	#N/A	Gypsy-77_CQ-I,Gypsy-172_AA-I	#N/A	LINE	39345
R=9550 (RR=9519. TRF=0.000 NSEG=0.010)	2182	LINE	#N/A	Gypsy6-SM_I	#N/A	LINE
Contig463	2179	LTR	#N/A	DIRS-16_DR	#N/A	LTR	31748
Contig1162	2177	LINE	#N/A	FERVR2_I,FERVR1_I,ERV1-1-I_DR,I-1_CQ	#N/A	LINE	23031
Contig1778	2160	DNA	#N/A	CR1-Y2_Aves,L2_AC_16	#N/A	DNA Transposon	32065
Contig1991	2160	DNA	#N/A	RTE-1_GA,NERV1_MD_I,Expander	#N/A	DNA Transposon	22039
Contig2075	2160	LINE	#N/A	REX1-5_XT,REX1-3_AFC,Rex1-3_FR,CR1-19_BF,Poseidon_Ac	#N/A	LINE	93317
Contig704	2158	DNA	#N/A	REX1-1_XT,MuDr-4_HM,Rehavkus-1N1_HR,Kiri-5_AAe,REX1-3_XT	#N/A	DNA Transposon	62794
Contig1275	2151	DNA	#N/A	BEL-6_DWil-I,piggyBac-N1_CQ,hATx-3_HM,Gypsy-15_RO-I,Helitron-3N1_NVi	#N/A	DNA Transposon	53593
Contig1677	2151	unclear	#N/A	Gypsy63-I_DR	#N/A	unclear	11520
Contig1659	2150	DNA	#N/A	TART	#N/A	DNA Transposon	13716
Contig340	2146	Retro	#N/A	MDG1_I,Copia-2_PSt-I,SYNRSC13,RTEX-5_BF,Gypsy-12_PPa-I	#N/A	Retro	15130
Contig1819	2145	DNA	#N/A	hAT-1_SM,LYDIA_I,Polinton-1_SP	#N/A	DNA Transposon	15785
Contig777	2142	DNA	#N/A	Gypsy18-I_SP,SINE_FR2,Transib-2_DEl,ENSPM-6_DR,Daphne-1_TCa	#N/A	DNA Transposon	133303
R=772 (RR=762. TRF=0.345 NSEG=0.108)	2141	DNA	#N/A	Gypsy-14_RP-I,HMSBEAGLE_I	#N/A	DNA Transposon	107121
R=9116 (RR=9087. TRF=0.000 NSEG=0.149)	2133	DNA	#N/A	Copia-1-I_BF,Gypsy1-I_GA,ARNOLD4	#N/A	DNA Transposon	13905
R=8383 (RR=8356. TRF=0.317 NSEG=0.064)	2131	DNA	#N/A	EhRLE2,MAUI,CR1-86_HM	#N/A	DNA Transposon	198310
Contig645	2125	LINE	#N/A	L1_AC_19	#N/A	LINE	10593
Contig1009	2123	DNA	#N/A	DM412_I,ERV1-4-EC_I,L1_AC_6	#N/A	DNA Transposon	10501
Contig662	2123	DNA	#N/A	Mariner-4_HM	#N/A	DNA Transposon	26116
Contig1170	2117	DNA	#N/A	Copia-1-I_BF,Gypsy1-I_GA,ARNOLD4	#N/A	DNA Transposon	1100
Contig2813	2117	DNA	#N/A	BEL-8_DPu-I,CR1-26_BF	#N/A	DNA Transposon	13224
Contig1022	2115	DNA	#N/A	UCON7,Polinton-3_HM	#N/A	DNA Transposon	14450
R=224 (RR=217. TRF=0.012 NSEG=0.124)	2114	LINE	LINE	REX1-5_XT,REX1-2_XT,Rex1-3_FR,Copia-4_TMe-I	#N/A	LINE	279086
Contig788	2110	DNA	#N/A	Gypsy-8N_PPa-LTR,Polinton-1_XT,hATm-6_HM,DNA-2-17_DR,Pifo_I	#N/A	DNA Transposon	237409
Contig1504	2091	DNA	#N/A	HERVG25,LIN11_SM,Gypsy-5_DAn-I	#N/A	DNA Transposon	42553
Contig840	2087	DNA	#N/A	MYSERV,ATREP18,ISL2EU-5_HM	#N/A	DNA Transposon	26860
R=10323 (RR=10286. TRF=0.022 NSEG=0.133)	2083	LTR	#N/A	hATw-1_LB,Merlin9_SM	#N/A	LTR	13160
R=12454 (RR=12398. TRF=0.000 NSEG=0.084)	2075	LINE	#N/A	BRIDGE2_FR,piggyBac-N6_BF,CR1-20_HM	#N/A	LINE	35799
Contig37	2072	LINE	#N/A	DNAX-4_SP,Tc1-9_Xt,Penelope-10_HM,L1-2_Ttr,BEL-17_DPu-I,Sola3-1_CB	#N/A	LINE	81311
Contig1929	2071	DNA	#N/A	REX1-4_AFC,Gypsy-83_CQ-I,SYNLACZJ	#N/A	DNA Transposon	16724
R=10362 (RR=10325. TRF=0.032 NSEG=0.118)	2065	unclear	#N/A	Gypsy-158_AA-I	#N/A	unclear	31954
R=2223 (RR=2210. TRF=0.000 NSEG=0.085)	2055	LTR	gypsy	Gypsy-29_GA-I,Gypsy-31_GA-I,IDEFIX_I	#N/A	LTR	55507
Contig197	2052	DNA	#N/A	HAL1-2A_Cho,Copia-47_BG-I,Outcast-19_AAe,CR1-5_NVi	#N/A	DNA Transposon	41409
Contig1412	2050	unclear	#N/A	Gypsy-158_AA-I	#N/A	unclear	91108
R=2403 (RR=2390. TRF=0.000 NSEG=0.100)	2049	DNA	#N/A	Rehavkus-2_TC,VANDAL14,AF025843,hAT-33_SM	#N/A	DNA Transposon
Contig482	2041	DNA	#N/A	Polinton-3_HM	#N/A	DNA Transposon	15530
Contig451	2039	DNA	#N/A	hAT-6_XT,ACCORD_I,P-1N_HM	#N/A	DNA Transposon	21376
R=3465 (RR=3451. TRF=0.000 NSEG=0.165)	2038	DNA	#N/A	TC1,BEL-41_CQ-I,Tx1-13_CQ	#N/A	DNA Transposon
Contig2056	2033	DNA	#N/A	Gypsy-20-I_NVi	#N/A	DNA Transposon	183529
Contig29	2025	LINE	#N/A	REX1-1_GA,Rex1-2_PM,Rex1-2_FR	#N/A	LINE	414869
R=149 (RR=144. TRF=0.000 NSEG=0.122)	2019	LINE	#N/A	Gypsy-50_PIT-I,Gypsy-2_DWil-I,MER58B_Mpr,MER4BI	#N/A	LINE	66491
Contig2629	2018	DNA	#N/A	#N/A	#N/A	DNA Transposon	86958
Contig1860	2017	LTR	#N/A	I-8_AAe,L1-3_BT,hAT-27_SM	#N/A	LTR	10421
Contig534	2017	LINE	#N/A	Ginger1-6_HM,ERV19_MD_I,BEL-10_GA-I	#N/A	LINE	168902
Contig865	2014	LINE	#N/A	REX1-2_XT,DNA16TA1_DR	#N/A	LINE	28682
Contig2009	2013	LINE	#N/A	Gypsy-7N_PPa-LTR,HE1_SINE,RTE-19_BF	#N/A	LINE	34767
R=477 (RR=468. TRF=0.000 NSEG=0.068)	2010	DNA	#N/A	REX3,GYPSY4-LTR_CB,Crack-1_CS1	#N/A	DNA Transposon	41379
Contig878	2009	LINE	#N/A	#N/A	#N/A	LINE	8972
Contig2084	2004	unclear	#N/A	DNA2-15_CB,I_Ele18,Gypsy-76_MLP-I,MER115,DNA-8-7_DR,Harbinger-4C_PSt	#N/A	unclear	38459
Contig1349	2001	DNA	#N/A	Kiri-3_CQ,Penelope-12_HM,ACCORD2_I	#N/A	DNA Transposon	49338
Contig69	1999	DNA	#N/A	CR1-42_HM,MARINER28_CB,hATx-2_HM,HELITRON11_CB	Sat_38	TR	341659
Contig908	1998	LTR	#N/A	Gypsy-41_GA-I,Gypsy-7_XT-I	#N/A	LTR	14754
Contig1687	1997	LTR	#N/A	CR1-30_DR,Proto1-5_NG	#N/A	LTR	8126
Contig78	1997	Retro	#N/A	Daphne-21_SPu	#N/A	Retro	21546
R=10223 (RR=10187. TRF=0.452 NSEG=0.062)	1991	LTR	#N/A	Gypsy-31_AA-I	#N/A	LTR	784366
Contig845	1989	LINE	#N/A	Gypsy-24-LTR_XT,L1-3A_Cho,Harbinger2-1N1_ES	#N/A	LINE	7964
R=5372 (RR=5352. TRF=0.000 NSEG=0.052)	1987	DNA	#N/A	EnSpm-2_DR,DNA2-8_AP	#N/A	DNA Transposon	17691
R=502 (RR=493. TRF=0.020 NSEG=0.117)	1986	DNA	#N/A	Polinton-2_HM,TDR5,L2-1_DR,Gypsy10-I_Dpse,Gypsy-26_XT-I	#N/A	DNA Transposon	49688
Contig1074	1980	DNA	#N/A	RLTR4I_MM,Gypsy-3_PSt-I	#N/A	DNA Transposon	40907
Contig428	1980	DNA	#N/A	TOL2_OL,Helitron-5_SMo,hAT-7_HM,EnSpm-7_HM,L2_AC_14	#N/A	DNA Transposon	59879
Contig894	1979	LINE	#N/A	BEL-176_AA-I	#N/A	LINE	11804
Contig1706	1978	DNA	#N/A	hATx-3_HM,CR1-3_HM,ZAM_I,Mariner-24_HM,Polinton-2_DR,L2-3_Cis	#N/A	DNA Transposon	11152
Contig737	1974	DNA	#N/A	Rex1-2_PM,Gypsy-3_RO-I	#N/A	DNA Transposon	15345
Contig1151	1971	DNA	#N/A	Gypsy-4_PGr-I,Polinton-1_NVi,P-13_HM	#N/A	DNA Transposon	21835
Contig1750	1969	DNA	#N/A	Transib-15_HM,hAT-2_HM,BEL-648_AA-LTR	#N/A	DNA Transposon	16673
R=1633 (RR=1622. TRF=0.000 NSEG=0.288)	1965	LTR	#N/A	L1-24B_ACar,DNA-1_CQ,Helitron-2_NVi,Polinton-2_SM,HMSBEAGLE_I	#N/A	LTR	10163
Contig154	1964	DNA	#N/A	CR1-120_AAe,Polinton-1_SM,MER68_I,Charlie24,HERVFH21I,CPSC5_I	#N/A	DNA Transposon	32301
Contig1847	1958	unclear	#N/A	TART_B1,Waldo-3_AAe,MUDRN2_OS,DNA-2-20_DR,DNA-3_CQ	#N/A	unclear	23929
R=7188 (RR=7164. TRF=0.000 NSEG=0.026)	1948	LINE	#N/A	#N/A	#N/A	LINE
Contig916	1947	DNA	#N/A	DNA-9_CQ,Gypsy-1-I_DD,Ambal-1_FCy	#N/A	DNA Transposon	9471
Contig271	1938	Retro	#N/A	Gypsy-35_DEl-I	#N/A	Retro	29231
R=9735 (RR=9703. TRF=0.000 NSEG=0.103)	1934	DNA	#N/A	L1_Ele19,MAUI,hAT-35_HM,I_Ele39,Ginger2-1_HM,DNA-8-32_DR	#N/A	DNA Transposon	74878
Contig192	1933	Retro	#N/A	#N/A	#N/A	Retro	21999
Contig615	1933	DNA	#N/A	CR1-9_NVi,Sola1-N1B_CQ,L1-3_Vpa,CER4-I_CE,VANDAL1	#N/A	DNA Transposon	50862
R=304 (RR=296. TRF=0.329 NSEG=0.214)	1933	LTR	#N/A	Gypsy-74_MLP-I,DNAX-3_TCa,BEL-4-LTR_XT,Jockey-12_DAn	Sat_217	TR	85044
Contig1906	1932	Retro	#N/A	hAT-N53_DR	#N/A	Retro	108140
Contig920	1931	DNA	#N/A	SZ-19LTR,Gypsy-15_SMo-I	#N/A	DNA Transposon	20812
R=946 (RR=935. TRF=0.391 NSEG=0.178)	1924	DNA	#N/A	TART_DV,LOA_Ele7	#N/A	DNA Transposon	43200
Contig963	1921	DNA	#N/A	DNA8-12_CQ	#N/A	DNA Transposon	26123
R=368 (RR=360. TRF=0.000 NSEG=0.065)	1916	DNA	#N/A	TDR5,L2-1_DR	#N/A	DNA Transposon	47090
Contig1048	1915	LINE	#N/A	Chapaev-3B_HM,Polinton-3_HM	#N/A	LINE	19626
R=1067 (RR=1056. TRF=0.000 NSEG=0.055)	1910	Retro	#N/A	REX1-8_XT,HELITRON2_OS,Copia-8_SI-I,SMAR25	#N/A	Retro	9578
Contig122	1909	LTR	#N/A	Gypsy-83_CQ-I,Copia-1_AC-I	T_213a,T_213b,T_261	TR	153670	short fragment LTR inside TR
Contig842	1907	LINE	#N/A	ERVB1_1-I_RN	#N/A	LINE	31276
Contig1587	1902	DNA	#N/A	L1_Ele19,MAUI,hAT-35_HM,I_Ele39,Ginger2-1_HM,DNA-8-32_DR	#N/A	DNA Transposon	3076
Contig79	1897	LINE	#N/A	hAT-72_HM	#N/A	LINE	108314
R=1153 (RR=1142. TRF=0.059 NSEG=0.124)	1893	DNA	helitronORF	Helitron-2_DR,Helitron-2_NVi,Gypsy7-NVi_I,CryptonA-1_OL,hAT-67_HM,Transib-10_HM	#N/A	DNA Transposon	65682
R=4877 (RR=4858. TRF=0.000 NSEG=0.143)	1893	LTR	#N/A	Gypsy-50_PIT-I,DIRS-4_XT,Copia-1_AC-I,L2-6_DRe,L1-3_Opr,MER4BI	#N/A	LTR	27527
R=2063 (RR=2052. TRF=0.465 NSEG=0.039)	1891	DNA	#N/A	Gypsy-6_PPa-LTR	T_213a,T_261	LTR, TR	3916777
Contig993	1889	Retro	#N/A	L1-3_HM	#N/A	Retro	17907
R=7695 (RR=7671. TRF=0.000 NSEG=0.130)	1889	DNA	#N/A	Chapaev-4_HMa,hATw-1_HM,Gypsy-35_DEl-I,ATCOPIA61_I	#N/A	DNA Transposon	31345
Contig1358	1886	Retro	#N/A	Gypsy-213_AA-I,Gypsy-1-I_DD,Ambal-2_FCy	#N/A	Retro	75650
Contig118	1877	Retro	#N/A	R4-1_ED,Gypsy-17_DPu-I	#N/A	Retro	89027
Contig741	1877	Retro	#N/A	SYNPTZ12,MacERV6	#N/A	Retro	52423
Contig1557	1870	LINE	#N/A	DOC5_DM	#N/A	LINE	141873
Contig231	1864	LTR	#N/A	DNA-2-20_DR,I-1_DEl	#N/A	LTR	86982
Contig1426	1862	Retro	#N/A	SINE_TE,L1-28_XT,SINE_FR2,Harbinger-5_BF	#N/A	Retro	19926
Contig897	1858	DNA	#N/A	HERVIP10FH,MuDR8x_AP,MDG1_I,TIR43YW1_CE,Copia-30_PIT-I	#N/A	DNA Transposon	145173
Contig2692	1857	LTR	#N/A	Sola3-1_BF,MAUI,HERV17	#N/A	LTR	591545
Contig1254	1852	Retro	#N/A	ISL2EU-4_HM	#N/A	Retro	339438
Contig1431	1852	DNA	#N/A	Gypsy-59_CQ-I,Ag-Outcast-2	#N/A	DNA Transposon	18804
Contig1654	1852	LINE	#N/A	REX1-5_XT,REX1_FS,HAT1_DR,MDG1_LTR,Saci-2_I	#N/A	LINE	43921
Contig284	1852	LINE	#N/A	GYPSOL_I	#N/A	LINE	32254
Contig186	1849	LINE	#N/A	piggyBac-2_XT,RTE-1_GA,BEL-5_DEl-I	#N/A	LINE	117771
Contig2121	1848	Retro	#N/A	BURDOCK_I	#N/A	Retro	58788
R=3842 (RR=3826. TRF=0.471 NSEG=0.053)	1846	DNA	#N/A	Kolobok-10_HM,BLOOD_I	#N/A	DNA Transposon	85126
Contig1140	1845	LINE	#N/A	Gypsy71-LTR_DR,Ginger1-7_HM,Copia-5_DAn-I,hAT-36_SM,MER51I	#N/A	LINE	372607
Contig2057	1845	DNA	#N/A	hAT-3_DR,hAT-11_XT,ZAM_I,Polinton-1_EI,CHAPLIN1_FR,hAT-6_SM	#N/A	DNA Transposon	13973
Contig935	1845	LTR	#N/A	Polinton-2_XT	#N/A	LTR	32167
R=244 (RR=236. TRF=0.044 NSEG=0.055)	1839	DNA	#N/A	RTAg4,PRIMA4_I	#N/A	DNA Transposon	64923
R=720 (RR=710. TRF=0.000 NSEG=0.046)	1838	Retro	#N/A	Gypsy-6_RP-I,EnSpm-14_HM,Copia-26_PIT-I	#N/A	Retro	31349
Contig298	1836	LINE	#N/A	L1P_MA2,L1-1_DR,DIRS-17_XT	#N/A	LINE	21444
Contig841	1834	DNA	#N/A	Merlin-1_Hrobusta,MuDr-1x_SP	#N/A	DNA Transposon	199124
Contig289	1832	DNA	#N/A	LTR2_MD,CR1-47_HM,Copia-10_Ano-I,LTRX_ME	#N/A	DNA Transposon	13326
R=9966 (RR=9933. TRF=0.035 NSEG=0.117)	1831	DNA	#N/A	I_Ele36,Daphne-18_HM,MER4BI,HERV17	#N/A	DNA Transposon	14213
Contig477	1821	DNA	#N/A	Zator-1_CP,hATm-41_HM	#N/A	DNA Transposon	45680
Contig773	1819	DNA	#N/A	HARBINGER2_DR	#N/A	DNA Transposon	10538
Contig799	1817	unclear	#N/A	Gypsy-2_PGr-I	#N/A	unclear	28861
Contig85	1815	LTR	#N/A	#N/A	#N/A	LTR	140927
Contig97	1815	unclear	#N/A	L1ME5,Gypsy-13_Ano-LTR,SZ-64B_I	#N/A	unclear	30409
Contig625	1811	DNA	#N/A	L1M7_5end,Gypsy-15-I_HM	#N/A	DNA Transposon	21462
R=4767 (RR=4749. TRF=0.000 NSEG=0.097)	1810	LTR	#N/A	Gypsy-50_PIT-I,Copia-1_AC-I,L2-6_DRe,L1-3_Opr,MER4BI	#N/A	LTR	4398
R=7871 (RR=7846. TRF=0.000 NSEG=0.079)	1808	LTR	#N/A	Gypsy-34_GA-I,SINE2-1_AFC,tRNAThr_CB,HOMER	#N/A	LTR	28462
Contig1816	1807	Retro	#N/A	LTR17B1_EE,L2B-6_AAe,Gypsy-32_OD-I	#N/A	Retro	12433
Contig206	1807	LINE	#N/A	Helitron-N1_SP,HERVIP10FH,hAT-32_HM,L2-5_XT,Copia-8_PR-I,hATm-35_HM	#N/A	LINE	280790
R=1777 (RR=1766. TRF=0.018 NSEG=0.128)	1806	LINE	#N/A	Swimmer,MAUI,HERV17	#N/A	LINE	103585
Contig352	1804	Retro	#N/A	Gypsy-44_AA-I,L1-1A2_Sar,nimbus,Polinton-1_SM,MSAT-7_CQ,L1-12A_XT,ATTIR16T3A	#N/A	Retro	18954
Contig153	1800	LTR	#N/A	Zisupton_XM,ERV7b_MD_I	#N/A	LTR	33576
Contig794	1800	DNA	#N/A	I_Ele36,Daphne-18_HM,MER4BI,HERV17	#N/A	DNA Transposon	2445
Contig1652	1798	DNA	#N/A	Proto2-4_CS1,HERVIP10FH,L1-2_VC,Mariner-27_HM	#N/A	DNA Transposon	11038
R=1077 (RR=1066. TRF=0.000 NSEG=0.116)	1798	DNA	#N/A	Tx1-1_CQ,Gypsy-33_DWil-I,TART,EnSpm-12_HM,RT1	#N/A	DNA Transposon	9148
Contig1660	1797	DNA	#N/A	#N/A	#N/A	DNA Transposon	125762
Contig2182	1796	unclear	#N/A	ERV1-4B_TSy-LTR,MER4BI,CR1-5_NVi	#N/A	unclear	19424
Contig272	1789	unclear	#N/A	ERVB4_2-I_MM	#N/A	unclear	30111
R=528 (RR=519. TRF=0.017 NSEG=0.068)	1787	LINE	#N/A	MuDR9x_AP	#N/A	LINE	60444
Contig749	1780	LTR	#N/A	Polinton-2_HM,Gypsy6-NVi_I,Gypsy-613_AA-LTR,Gypsy-1_SMo-I,Sola3-1_BF	#N/A	LTR	49420
R=7649 (RR=7625. TRF=0.000 NSEG=0.165)	1769	DNA	#N/A	NOMAD_I,Polinton-3_HM,Tc1-3_FR,TZF28B,Gypsy-24-I_DR,L2-3_DRe	#N/A	DNA Transposon	62824
Contig1745	1768	DNA	#N/A	#N/A	T_213a,T_213b,T_261	TR	1707350
R=7514 (RR=7490. TRF=0.000 NSEG=0.102)	1766	DNA	#N/A	Cre-1_BM,GIZMO2_EI,Copia-1_GDe-I,L1_Carn5_5end	#N/A	DNA Transposon	4198
Contig1150	1765	LINE	#N/A	Gypsy-29_PSo-I,HERVIP10FH,DIRS-8B_DR,CR1-79_HM	#N/A	LINE	7121
Contig922	1765	LINE	#N/A	Academ-2_SP,I-3_DAn,Tx1-2_XT,Penelope-5_HM,hATw-3N1_BF	#N/A	LINE	24478
Contig456	1762	DNA	#N/A	piggyBac-N2_XT,ATHILA4C_I,Z-REP	#N/A	DNA Transposon	24649
R=7550 (RR=7526. TRF=0.000 NSEG=0.043)	1762	LINE	#N/A	#N/A	#N/A	LINE	8355
R=8410 (RR=8383. TRF=0.000 NSEG=0.087)	1762	DNA	#N/A	TRILLIAN1,R1C_NVi,Sola2-6_HM	#N/A	DNA Transposon	48510
Contig1700	1757	Retro	#N/A	Mariner-14_DAn,Helitron-N3_PPa,L1_AC_12,Gypsy-17_DPu-I,MER57A_I,MSAT_MG,MER51I,Gypsy18-I_Dya	#N/A	Retro	10144
Contig816	1757	DNA	#N/A	L1-4B_EC,MARINER1_MD	#N/A	DNA Transposon	8302
Contig1984	1756	unclear	#N/A	BHIKHARI-4-LTR_DR,FUGUREP2,DNA-2-19_DR	#N/A	unclear	31354
Contig1582	1755	DNA	#N/A	Gypsy-36_OD-I	#N/A	DNA Transposon	242951
R=798 (RR=788. TRF=0.000 NSEG=0.074)	1754	LINE	#N/A	Gypsy-26_DPu-I,Daphne-51_HMa,Mariner-2_AP,Ginger1-2_HM,RIRE3A_I	#N/A	LINE	44868
R=72 (RR=71. TRF=0.000 NSEG=0.084)	1752	DNA	#N/A	DNA8-66_AP,Copia-1_AC-I	T_213a,T_213b,T_261	DNA Transposon	146825
Contig1458	1751	DNA	#N/A	REX5,TRILLIAN2,Chapaev-15_HM,Gypsy-31-LTR_DR	#N/A	DNA Transposon	7993
Contig472	1751	LINE	#N/A	MARNA,Mariner-2_BF,LOOPERN2_DR,PRIMA4_I	#N/A	LINE	119764
Contig1474	1750	LINE	#N/A	GYPSOL_I,Gypsy-33-I_DR	#N/A	LINE	14299
R=369 (RR=361. TRF=0.239 NSEG=0.366)	1747	DNA	#N/A	DM176,HERVKC4,Polinton-1_CB,TAHRE,Gypsy-1-LTR_MH	#N/A	DNA Transposon	126232
Contig2440	1744	LINE	#N/A	Transib-16_HM,L1-1_Str,SMAR16	#N/A	LINE	68319
R=10184 (RR=10149. TRF=0.000 NSEG=0.113)	1742	LINE	#N/A	DNAX-4_SP,Tc1-9_Xt,Penelope-10_HM,L1-2_Ttr,BEL-17_DPu-I,Sola3-1_CB	#N/A	LINE	14633
Contig575	1738	LINE	#N/A	SPIN_NA_6_Et,Crack-36_AAe,L2_AC_9,Gypsy-23_GA-I	#N/A	LINE	14195
Contig629	1735	unclear	#N/A	Polinton-3_HM,NOMAD_I,MARINER42_CB,Tc1-3_FR,TZF28B,Gypsy-24-I_DR,L2-3_DRe	#N/A	unclear	23108
Contig1085	1734	unclear	#N/A	Gypsy-148_AA-I,MER57C2	#N/A	unclear	327045
Contig653	1734	DNA	#N/A	TCN6-I,I-54_AAe	#N/A	DNA Transposon	20846
Contig848	1723	DNA	#N/A	Gypsy-58_MLP-I,DNA21TA1_DR	#N/A	DNA Transposon	8563
Contig125	1721	LINE	#N/A	hATm-13_HM,Mariner-22_HM	#N/A	LINE	88512
Contig1062	1718	LINE	#N/A	Rex6,DONG_FR2,R4-1_AC,DNA-TTAA0-4_DR	#N/A	LINE	38410
Contig991	1718	Retro	#N/A	Gypsy-20-I_DR,CR1-74_AAe	#N/A	Retro	9274
Contig1152	1717	LTR	#N/A	HERV39	#N/A	LTR	197896
Contig739	1716	DNA	#N/A	DIRS-8_DR	#N/A	DNA Transposon	83767
Contig43	1709	Retro	#N/A	SYNPRLB,MMERGLN_I,Gypsy-7_DEl-I	#N/A	Retro	90119
Contig121	1706	unclear	#N/A	EnSpm-10_HM,MuDr-1_TV,Harbinger-1_XT,DMRT1A	#N/A	unclear	19672
Contig1212	1703	LTR	#N/A	Gypsy-34_GA-I,SINE2-1_AFC,tRNAThr_CB,Polinton-2_HM	#N/A	LTR	24738
Contig1744	1703	LINE	#N/A	DIRS-4_DR,DNA8-11_CQ,ERV2-1_Mim-I	#N/A	LINE	44512
Contig1002	1701	unclear	#N/A	hAT-14_SM	#N/A	unclear	9802
Contig357	1700	unclear	#N/A	Gypsy-33_CQ-I	#N/A	unclear	12562
Contig1213	1699	LINE	#N/A	MAUI,REX5	#N/A	LINE	327381
R=1049 (RR=1038. TRF=0.038 NSEG=0.054)	1694	DNA	#N/A	Gypsy-3_DPu-I	#N/A	DNA Transposon	955416
Contig135	1693	LINE	#N/A	L1A2_OC,HaTad1-2_BG	#N/A	LINE	58107
Contig880	1693	DNA	#N/A	ATCOPIA74_I,Gypsy-1_DFa-I,Helitron3_PPa	#N/A	DNA Transposon	9993
R=10340 (RR=10303. TRF=0.000 NSEG=0.135)	1691	DNA	#N/A	#N/A	#N/A	DNA Transposon	53804
R=1496 (RR=1485. TRF=0.030 NSEG=0.232)	1690	DNA	#N/A	CR1-78_AAe,I-7C_AAe,Gypsy11-NVi_I,DNA-2-31_DR,DNA-8-29_DR	#N/A	DNA Transposon	36119
Contig1076	1686	DNA	#N/A	TguLTRK1_I,TAHRE,HETRP_DM,BLACKJACK,MuDR-1_TMe,Nimb-1_DR,piggyBac1_CI	#N/A	DNA Transposon	8150
Contig798	1685	LINE	#N/A	#N/A	#N/A	LINE	1480
Contig1503	1671	DNA	#N/A	#N/A	#N/A	DNA Transposon
Contig941	1668	LINE	#N/A	DM176,LTR5_DN,L1MED_5,Charlie21a	#N/A	LINE	163149
Contig1868	1659	unclear	#N/A	ERE1_EH,BEL-3_SI-I	#N/A	unclear	9196
R=4300 (RR=4282. TRF=0.000 NSEG=0.138)	1657	DNA	#N/A	#N/A	#N/A	DNA Transposon	15480
Contig1831	1651	Retro	#N/A	Copia-4_AT-I	#N/A	Retro	10939
Contig1934	1650	DNA	#N/A	L1SU_SP,L1-58_XT,Polinton-1_TV	#N/A	DNA Transposon	6599
Contig1595	1649	DNA	#N/A	REX1-2_XT	#N/A	DNA Transposon	27156
Contig1220	1646	Retro	#N/A	CR1-48_HM,CR1-5_SP,HET-A_DV	#N/A	Retro	8347
R=7900 (RR=7875. TRF=0.000 NSEG=0.029)	1646	Retro	#N/A	MER6,L2-2_Cis,I-10_AAe,L1-10_CQ,Gypsy-84_AA-I	#N/A	Retro	198777
Contig1121	1645	LINE	#N/A	Daphne-51_HMa,Gypsy-25_DYa-I	#N/A	LINE	7290
R=520 (RR=511. TRF=0.000 NSEG=0.024)	1643	LINE	#N/A	ATENSPM10,L1-15_XT	#N/A	LINE	39317
R=895 (RR=884. TRF=0.417 NSEG=0.144)	1641	DNA	#N/A	TV1I,Gypsy-82_MLP-I	#N/A	DNA Transposon	1674144
Contig141	1640	DNA	#N/A	L1M7_5end,HAL1-2A_Cpo,Gypsy-15-I_HM,hATx-6_SM	#N/A	DNA Transposon	38429
Contig1710	1640	DNA	#N/A	BEL-177_AA-LTR,CR1-79_HM,hAT-N38_DR	#N/A	DNA Transposon	18176
Contig1668	1637	unclear	#N/A	Gypsy-62_CQ-I,Gypsy13-I_SP,Helitron-2_SP	#N/A	unclear	18089
R=403 (RR=395. TRF=0.000 NSEG=0.087)	1635	DNA	mariner	TCB2,INVADER1_I,Tc1-2Xt	#N/A	DNA Transposon	75466
Contig316	1634	LINE	#N/A	HAL1-1A_Cho,Rehavkus-1_HR	#N/A	LINE	14449
Contig396	1632	DNA	#N/A	Gypsy7-NVi_I,hAT-28_HM,ATSAT5	#N/A	DNA Transposon	22288
Contig1316	1628	DNA	#N/A	Gypsy-6-I_XT	#N/A	DNA Transposon	13890
R=1098 (RR=1087. TRF=0.000 NSEG=0.087)	1624	unclear	#N/A	CHAPKA1_EM,Mirage1_CB,Helitron-2_DR	#N/A	unclear	47702
Contig1760	1619	LINE	#N/A	Gypsy-3_RP-I,Gypsy-4_BG-LTR	#N/A	LINE	20051
Contig2060	1615	LTR	#N/A	SINE2-1_GA,L1M1_5	#N/A	LTR	176923
R=8700 (RR=8673. TRF=0.000 NSEG=0.128)	1615	DNA	#N/A	ATCOPIA90_I,MuDr-1x_SP,MER57A_I,L2-6_NVi	#N/A	DNA Transposon	11415
Contig102	1613	LINE	#N/A	Polinton-2_HM,Polinton-1_TC	#N/A	LINE	20048
Contig1087	1605	unclear	#N/A	Daphne-13_HMa,VANDAL2	#N/A	unclear	16734
Contig583	1605	DNA	#N/A	#N/A	#N/A	DNA Transposon	24568
R=3634 (RR=3618. TRF=0.000 NSEG=0.014)	1603	Retro	#N/A	L1MAB_EC	#N/A	Retro	11056
R=9556 (RR=9525. TRF=0.000 NSEG=0.031)	1603	LINE	LINE	R2-1_TG	#N/A	LINE	9612
R=4962 (RR=4943. TRF=0.000 NSEG=0.081)	1601	unclear	#N/A	UCON7,Crack-9_BF,Gypsy-9_MLP-I,piggyBac-N6_SP	#N/A	unclear	18441
Contig815	1600	DNA	#N/A	P_DB,VANDAL11,hATm-42_HM,Vingi-1_AAl	#N/A	DNA Transposon	6738
R=2039 (RR=2028. TRF=0.000 NSEG=0.000)	1600	DNA	#N/A	HAL1-3D_Cpo	#N/A	DNA Transposon	11524
Contig1049	1599	DNA	#N/A	ECT7DN2,LOA-6_CQ,Gypsy-21_MLP-I	#N/A	DNA Transposon	9746
Contig1280	1592	LINE	#N/A	L2,QUASIMODO_I,ARNOLD2	#N/A	LINE	40810
Contig359	1592	Retro	#N/A	Gypsy-1_PCR-I	#N/A	Retro	17666
Contig152	1591	LINE	#N/A	Mariner-19_HM,L1-5_HM,EnSpm-13_HM	#N/A	LINE	53395
R=3561 (RR=3546. TRF=0.000 NSEG=0.000)	1590	unclear	#N/A	CACTA-1_Dpulex	#N/A	unclear	8336
Contig1371	1589	unclear	#N/A	hAT-1_XT,CR1-84_HM,hAT-6_XT	#N/A	unclear	22253
Contig1650	1589	DNA	#N/A	ATCOPIA90_I,MuDr-1x_SP,MER57A_I,L2-6_NVi,LTR73_EC	#N/A	DNA Transposon	331
Contig2023	1589	unclear	#N/A	Sola2-1_HM,CR1-64_HM	#N/A	unclear	7267
Contig288	1587	LTR	#N/A	Gypsy-35_GA-I,Gypsy-38_GA-I,hATm-5_HM,MuDR-10_CB	#N/A	LTR	28456
Contig1128	1585	DNA	#N/A	Kolobok-16_HM,HERV-K14CI,Gypsy156-LTR_DR	#N/A	DNA Transposon	140239
Contig1696	1583	DNA	#N/A	hAT-11_HM,L1_AC_11,HELITRON2_CE	#N/A	DNA Transposon	6968
Contig247	1583	DNA	#N/A	HAL1-3D_Cpo	#N/A	DNA Transposon
Contig1178	1582	LTR	#N/A	HELITRON6_CB	#N/A	LTR	421780
Contig659	1582	Retro	#N/A	Gypsy-19_PIT-I	#N/A	Retro	21936
Contig520	1579	DNA	#N/A	SINE_TE,MuDR-2_TV,piggyBac-N1_CQ,Shinagawa-6_AAe,L1_AC_6	#N/A	DNA Transposon	11000
Contig860	1579	Retro	#N/A	DIRS-N1_DR,HAL1-2A_Cho,Polinton2_SM,SQR2_MM,MER69B	#N/A	Retro	21983
Contig368	1573	Retro	#N/A	Gypsy-33-LTR_NVi,GYPSY12-I_AG	#N/A	Retro	31347
Contig767	1573	DNA	#N/A	#N/A	#N/A	DNA Transposon	10178
Contig1302	1571	LINE	#N/A	MER6,L2-2_Cis,I-10_AAe,L1-10_CQ,Gypsy-84_AA-I	#N/A	LINE	63860
Contig469	1571	LINE	#N/A	DNA8-82_AP,SINE3_AFC,hAT-28_SM	#N/A	LINE	5882
Contig957	1568	LINE	#N/A	MER4I,Chapaev-8_HM	#N/A	LINE	452550
R=2822 (RR=2809. TRF=0.000 NSEG=0.221)	1567	DNA	#N/A	Tx1-1_CQ,ATGP6I,Polinton-2_CB	#N/A	DNA Transposon	12073
R=666 (RR=657. TRF=0.000 NSEG=0.135)	1567	Retro	#N/A	hAT-1_XT,CryptonS-11_PS,hAT-6_XT	#N/A	Retro	49082
Contig790	1566	LINE	#N/A	Polinton-8_NVi	#N/A	LINE	8354
Contig1812	1565	LINE	#N/A	#N/A	#N/A	LINE	6049
Contig188	1563	LTR	#N/A	Gypsy-81_AA-I	#N/A	LTR	29586
Contig173	1560	unclear	#N/A	Tc1-2Xt,R4-1_ED,L2-2_DRe,MuDR-1_DEl	#N/A	unclear	48539
Contig1898	1560	unclear	#N/A	#N/A	#N/A	unclear	6478
Contig1026	1558	unclear	#N/A	SZ-48LTR	#N/A	unclear	6852
Contig1200	1558	DNA	#N/A	Kiri-18_AAe	#N/A	DNA Transposon	13876
Contig1116	1556	DNA	#N/A	GYPSY45-I_AG,ATCOPIA76LTR	#N/A	DNA Transposon	163263
R=7863 (RR=7838. TRF=0.029 NSEG=0.174)	1556	LTR	#N/A	#N/A	#N/A	LTR	255701
Contig1753	1555	LINE	#N/A	CR1-55_HM	#N/A	LINE	39628
R=2237 (RR=2224. TRF=0.000 NSEG=0.165)	1552	DNA	#N/A	Mariner2N_MEu,Kolobok1-N1_NVi,ISL2EU-4_HM,DIRS-8_DR	#N/A	DNA Transposon	32879
R=427 (RR=419. TRF=0.000 NSEG=0.135)	1552	LINE	#N/A	#N/A	#N/A	LINE	12433
Contig1647	1551	DNA	#N/A	L1_AC_9,TART_DV,Polinton-1_DAn	#N/A	DNA Transposon	9508
Contig2205	1548	LINE	#N/A	RTE-1_GA	#N/A	LINE	168881
Contig1656	1547	DNA	#N/A	#N/A	#N/A	DNA Transposon	14744
Contig781	1546	DNA	#N/A	Kolobok-1_XT,Ginger1-11_HM,Tx1-1_AAe,CR1-9_NVi	#N/A	DNA Transposon	53375
Contig1755	1545	DNA	#N/A	hAT-13_HM,UCON27,TguLTRK1_I	#N/A	DNA Transposon	50127
Contig1777	1540	unclear	#N/A	L2_AC_7	#N/A	unclear	23571
R=8784 (RR=8756. TRF=0.000 NSEG=0.162)	1538	LINE	#N/A	TCB2,DINOLT1,REX1-4_AFC,GYPSY2_I	#N/A	LINE	20847
Contig2115	1537	DNA	#N/A	CR1-54_HM,L2-1c_Cis	#N/A	DNA Transposon	14232
Contig769	1537	LINE	#N/A	R2-1_TG	#N/A	LINE	2420
R=12582 (RR=12526. TRF=0.000 NSEG=0.010)	1535	LINE	#N/A	DNA6-3_MLP	#N/A	LINE	6138
Contig838	1532	DNA	#N/A	NICER2v_Rn_I	#N/A	DNA Transposon	8581
R=11130 (RR=11086. TRF=0.037 NSEG=0.108)	1530	LINE	#N/A	Nimb-2_DR,TZF28B	#N/A	LINE	6484
Contig2019	1529	unclear	#N/A	Gypsy-9_DAn-I,L1-46_XT	#N/A	unclear	282987
Contig473	1524	LINE	#N/A	FERVR1_I,Gypsy-13_Ano-I,Gypsy-30_GA-I,MLT1F1	#N/A	LINE	28058
Contig849	1522	DNA	#N/A	Sola1-10_AP	#N/A	DNA Transposon	6449
Contig1484	1521	unclear	#N/A	piggyBac-N2_XT,HARB-1_OS,Gypsy-617_AA-LTR	#N/A	unclear	37934
Contig1204	1520	DNA	#N/A	P-1N_HM,MER6,Gypsy-42_GA-I	#N/A	DNA Transposon	37168
Contig1018	1519	Retro	#N/A	HERV35I,Gypsy-33_AA-LTR	#N/A	Retro	21972
Contig239	1517	unclear	#N/A	hATx-1_HM,Gypsy-29_DWil-I,CR1-67_HM	#N/A	unclear	14327
Contig337	1517	unclear	#N/A	EnSpm-7_HM	#N/A	unclear	7261
R=3311 (RR=3298. TRF=0.000 NSEG=0.032)	1516	LINE	#N/A	MAUI,Copia-23_MLP-I,EnSpm-14_OS,DNA6-1_MLP,Rehavkus-1_NVi	#N/A	LINE	3595
Contig1019	1515	LINE	#N/A	TCB2,DINOLT1,REX1-4_AFC,GYPSY2_I	#N/A	LINE	21844
Contig2905	1515	DNA	#N/A	Transib1,Polinton1_SM,ERV9_MD_I,FUROUSHA1	#N/A	DNA Transposon	6689
Contig2086	1511	LINE	#N/A	#N/A	#N/A	LINE	29456
R=1879 (RR=1868. TRF=0.000 NSEG=0.132)	1510	DNA	#N/A	Crack-36_AAe,L2_AC_9,Gypsy-23_GA-I	#N/A	DNA Transposon	6042
Contig1193	1509	LINE	#N/A	LIN5_SM,EnSpm-N1_AAe	#N/A	LINE	7896
Contig1441	1509	Retro	#N/A	EhRLE2,CR1-86_HM	#N/A	Retro	1722
Contig2304	1502	Retro	#N/A	Gypsy-16_DEl-I,Crack-1_CQ	#N/A	Retro	30583
Contig686	1501	Retro	#N/A	EnSpm-4_DR,Mariner-34_SM,PIVE,Sagan-1_ALai,Gypsy-5_SI-LTR	#N/A	Retro	7553
R=9692 (RR=9660. TRF=0.000 NSEG=0.014)	1501	DNA	#N/A	Gypsy-12_PGr-I	#N/A	DNA Transposon	6528
Contig1430	1498	Retro	#N/A	L2_AC_15,LTR10E_Opr,Gypsy4-SM_I,I-1_AA	#N/A	Retro	22648
Contig924	1498	Retro	#N/A	DERV2a_I,BEL-609_AA-I	#N/A	Retro	312836
R=1148 (RR=1137. TRF=0.000 NSEG=0.171)	1495	DNA	#N/A	MAUI,MDG1_LTR,Gypsy-177_AA-I,Helitron-N1_SP	#N/A	DNA Transposon	54599
Contig1751	1490	DNA	#N/A	#N/A	#N/A	DNA Transposon	20908
Contig54	1488	LINE	#N/A	MARINER42_CB,Copia-1_SPDB-I,Gypsy143-I_DR	#N/A	LINE	64947
Contig1968	1487	DNA	#N/A	L1ME5,P-12_HM,DNA-AT-2_DR,DNA-4-1_HM,Tc1-1_PM	#N/A	DNA Transposon	13526
Contig928	1487	LINE	#N/A	Penelope-5_XT,BRIDGE2_FR	#N/A	LINE	61176
Contig1174	1483	Retro	#N/A	TDD4	#N/A	Retro	10133
Contig753	1479	LTR	#N/A	Kolobok-4_TV	#N/A	LTR	5657
Contig389	1476	DNA	#N/A	Charlie21a,L1-12A_XT,HERV17	#N/A	DNA Transposon	10972
Contig1665	1473	Retro	#N/A	Gypsy-28_DEl-LTR,Copia-1_TMe-LTR,L1-4_HM	#N/A	Retro
Contig2864	1471	unclear	#N/A	INVADER2_I	#N/A	unclear	12350
Contig923	1469	LINE	#N/A	tRNAAlaAGC_CB	#N/A	LINE	18255
Contig191	1468	LINE	#N/A	Penelope-12_HM	#N/A	LINE	28036
Contig844	1464	LINE	#N/A	#N/A	#N/A	LINE	21052
R=849 (RR=838. TRF=0.000 NSEG=0.083)	1463	LTR	#N/A	Gypsy4-SM_I	#N/A	LTR	30976
Contig738	1462	DNA	#N/A	I-52_AAe,Ambal-1_FCy,piggyBac-18_SM,RTEX-1_DR	#N/A	DNA Transposon	28623
Contig1597	1457	Retro	#N/A	Nimb-2_DR	#N/A	Retro	19129
R=3998 (RR=3982. TRF=0.000 NSEG=0.021)	1456	DNA	gypsy	Gypsy103-I_Dr,TC1_PP,ISL2EU-1_BM	#N/A	DNA Transposon	11017
Contig1278	1452	LTR	#N/A	Sola1-1_AP,Sola1-3_AP,Ambal-3N1_FCy	#N/A	LTR	260896
Contig165	1447	DNA	#N/A	HARBINGERN6_DR,Gypsy-249_AA-I,Zator-N2_AAe,Gypsy-22_GA-I,XXU35132	#N/A	DNA Transposon	47238
Contig2861	1445	LINE	#N/A	Gypsy9-SM_I,EnSpm-8_HM,MINIME_DN	#N/A	LINE	24458
Contig1055	1444	DNA	#N/A	#N/A	#N/A	DNA Transposon	7035
Contig105	1441	LINE	#N/A	Gypsy-45_DEl-I,Polinton-2_HM	#N/A	LINE	15169
Contig626	1440	DNA	#N/A	Gypsy-12_PGr-I	#N/A	DNA Transposon	2102
Contig1646	1439	DNA	#N/A	MARINER37_CB,MOGWAI2_EI	Sat_38	TR	5158301
R=139 (RR=135. TRF=0.000 NSEG=0.095)	1439	DNA	mariner	TCB1,Zator-2_Hrobusta,Sola1-11_AP,SZ-17_I	#N/A	DNA Transposon	188550
R=3548 (RR=3533. TRF=0.000 NSEG=0.052)	1439	LINE	#N/A	Jockey-2_DYa,EnSpm-17_HM,Gypsy-50_PIT-I	#N/A	LINE	11245
Contig1917	1429	unclear	#N/A	Swimmer,ONSATB	#N/A	unclear	44085
R=9043 (RR=9014. TRF=0.068 NSEG=0.193)	1429	Retro	#N/A	#N/A	#N/A	Retro	46536
Contig524	1426	LINE	#N/A	EnSpm-17_HM,Gypsy-50_PIT-I	#N/A	LINE	6498
R=3268 (RR=3255. TRF=0.000 NSEG=0.152)	1426	DNA	#N/A	CERP4,HERV30I	#N/A	DNA Transposon	13380
R=11044 (RR=11001. TRF=0.000 NSEG=0.025)	1425	unclear	#N/A	Helitron-2_DR,Sola2-2_HM,BEL4-I_DR	#N/A	unclear	4275
Contig1020	1424	LINE	#N/A	piggyBac-2_XT	#N/A	LINE	150733
Contig1442	1421	LINE	#N/A	TART_DV,Mariner-6_SM,TguERVK4_I	#N/A	LINE	109268
Contig2091	1421	DNA	#N/A	L1_AC_5,RTEX-7_ACar	#N/A	DNA Transposon	238994
Contig2354	1421	DNA	#N/A	CR1-55_AAe	#N/A	DNA Transposon	10091
Contig378	1418	DNA	#N/A	Ginger1-11_HM,Gypsy-19_DEl-I	#N/A	DNA Transposon	15159
R=7999 (RR=7974. TRF=0.000 NSEG=0.085)	1418	DNA	#N/A	ENSPM5_OS	#N/A	DNA Transposon	13419
Contig1207	1410	Retro	#N/A	#N/A	#N/A	Retro	2159
Contig2785	1408	LINE	#N/A	CR1-26_HM,Rehavkus-1_DA	#N/A	LINE	6134
R=8575 (RR=8548. TRF=0.000 NSEG=0.032)	1408	unclear	mariner	IAPEY4_I,BEL-4_SI-LTR,TC1-2_DM	#N/A	unclear	31134
Contig1824	1407	unclear	#N/A	#N/A	#N/A	unclear	6617
Contig1075	1406	LINE	#N/A	L1-5B_EC,Outcast-19_AAe	#N/A	LINE	5694
Contig1033	1405	LTR	#N/A	Gypsy-2_PPP-LTR	#N/A	LTR	331389
R=6038 (RR=6018. TRF=0.028 NSEG=0.196)	1405	LINE	#N/A	Mariner-10_HM,EnSpm-10_OS	#N/A	LINE	10513
Contig801	1404	LTR	#N/A	HETRP_DM,Chapaev3-4_PM,HARLEQUIN,HELITRON13_CB	#N/A	LTR	1725
Contig1264	1401	LINE	#N/A	REX1_CY,Gypsy-22-I_XT,Gypsy-17-I_DR,Crack-5_HM,INVADER2_I	#N/A	LINE	29678
Contig21	1399	LINE	#N/A	Gypsy-47_GA-LTR,ATCOPIA43I,TART_DV,hAT-4D_AP	#N/A	LINE	234285
Contig2114	1399	DNA	#N/A	Gypsy-15_SMo-I,hAT-N18_AP,Kolobok-4_TV	#N/A	DNA Transposon	7412
Contig1025	1396	LTR	#N/A	#N/A	#N/A	LTR	40092
Contig1729	1394	LTR	#N/A	#N/A	#N/A	LTR	5245
Contig1239	1391	unclear	#N/A	Daphne-18_HM,CER16-I_CE	#N/A	unclear	7038
Contig295	1391	unclear	#N/A	GYPSY9_LTR,CR1-35_HM,EnSpm-13_HM	#N/A	unclear	11043
R=3200 (RR=3187. TRF=0.000 NSEG=0.019)	1391	LINE	#N/A	hATm-5_HM	#N/A	LINE	8617
Contig146	1390	LINE	#N/A	Hoana1,TC1_PP	#N/A	LINE	94874
Contig1051	1389	Retro	#N/A	L1-39_XT,Chapaev-21_HM,L1-22_ACar	#N/A	Retro	20905
R=7549 (RR=7525. TRF=0.299 NSEG=0.019)	1389	LINE	#N/A	#N/A	#N/A	LINE	175738
Contig2867	1388	DNA	#N/A	Helitron-N1_SP,HELITRON7_OS,DNA-5_AAe	#N/A	DNA Transposon	128810
Contig593	1386	LINE	#N/A	Mariner-10_HM,EnSpm-10_OS	#N/A	LINE
Contig734	1386	LINE	#N/A	Transib-10_HM	#N/A	LINE	9283
Contig481	1381	unclear	#N/A	Gypsy-9_DAn-LTR	#N/A	unclear	12122
Contig693	1381	DNA	#N/A	DM176	#N/A	DNA Transposon	49325
Contig119	1379	Retro	#N/A	#N/A	#N/A	Retro	25124
Contig832	1377	LINE	#N/A	#N/A	#N/A	LINE	6475
R=7536 (RR=7512. TRF=0.000 NSEG=0.077)	1375	DNA	#N/A	REX5,Chapaev-15_HM,Gypsy-31-LTR_DR	#N/A	DNA Transposon	18954
Contig394	1374	unclear	#N/A	Mariner-32_HM,Chapaev-3_ACa	#N/A	unclear	19553
Contig951	1373	Retro	#N/A	Gypsy-34_DWil-LTR,HeliNoto	#N/A	Retro	6124
Contig2874	1372	LINE	#N/A	BEL-1_GA-I	#N/A	LINE	5671
Contig1329	1371	DNA	#N/A	R1C_NVi,Sola2-6_HM	#N/A	DNA Transposon
Contig1448	1371	LTR	#N/A	Tc1-4Ory	#N/A	LTR	204173
Contig2080	1368	LINE	#N/A	I-5_AAe	#N/A	LINE	5475
R=5980 (RR=5960. TRF=0.000 NSEG=0.061)	1367	DNA	#N/A	Gypsy-13_Ano-I,P-4_AP	#N/A	DNA Transposon	56161
Contig995	1366	LTR	#N/A	Gypsy-3_CCO-LTR	#N/A	LTR	5621
Contig499	1364	DNA	#N/A	Polinton-1_SM,CarLTR9_LTR	#N/A	DNA Transposon	9662
R=6662 (RR=6640. TRF=0.000 NSEG=0.099)	1358	DNA	#N/A	P-17_HM,Gypsy-20_DWil-I,Mariner-12_HM,KAMIKAZE_BM-I	#N/A	DNA Transposon	5431
Contig679	1355	DNA	#N/A	Gypsy-19_SMo-I,L1-6_MD,SINE_TE	#N/A	DNA Transposon	10201
Contig853	1355	unclear	#N/A	ATCOPIA55_I,Helitron-2_DR	#N/A	unclear	6859
R=8729 (RR=8701. TRF=0.000 NSEG=0.051)	1355	Retro	#N/A	BEL-1_DAn-I	#N/A	Retro	6060
Contig656	1351	DNA	#N/A	TC1_RT	#N/A	DNA Transposon	221716
Contig831	1350	unclear	#N/A	Mariner-2_PTrit,MuDR2x_AP,Polinton-2_SM	#N/A	unclear	8184
Contig1884	1346	LINE	#N/A	Gypsy-18_GA-I,Gypsy-4_GA-I,INVADER6_I	#N/A	LINE	25079
Contig828	1344	unclear	#N/A	Rehavkus-1_NVi	#N/A	unclear	35560
R=8957 (RR=8929. TRF=0.000 NSEG=0.022)	1343	LINE	#N/A	#N/A	#N/A	LINE	16311
Contig1130	1342	LINE	#N/A	MuDR-1_DPu	#N/A	LINE	5661
Contig1455	1338	DNA	#N/A	Ginger1-3_HM,IAPEY4_I,BEL-4_SI-LTR,TC1-2_DM	#N/A	DNA Transposon	1460
R=266 (RR=258. TRF=0.000 NSEG=0.022)	1337	LINE	mariner	Tc1-14_Xt,Tc1-1_Xt,MARINER36_CB	#N/A	LINE	358428
Contig445	1336	LTR	#N/A	CHARLIE1,Sola2-1_NVi	#N/A	LTR	10849
Contig207	1335	LINE	#N/A	Gypsy-608_AA-I,DIRS_Nvi	#N/A	LINE	36291
R=9723 (RR=9691. TRF=0.000 NSEG=0.057)	1331	DNA	#N/A	ATGP3I	#N/A	DNA Transposon	8729
Contig970	1330	DNA	#N/A	Harbinger-19_PGr,Polinton-1_HM,I-5_DR,Kolobok-2_BF,ROVER_DM	#N/A	DNA Transposon	22614
R=3536 (RR=3521. TRF=0.034 NSEG=0.099)	1326	LTR	#N/A	DNA-2-2_HM,LOA_Ele5,Crack-4_HM	#N/A	LTR	60082
Contig802	1325	DNA	#N/A	#N/A	#N/A	DNA Transposon	5291
Contig1933	1324	Retro	#N/A	Copia-3_PIT-LTR,Helitron-N1_SP	#N/A	Retro	163013
Contig986	1324	DNA	#N/A	hAT-N41_DR	#N/A	DNA Transposon	42811
Contig1832	1319	unclear	#N/A	Sola1-N1_AAe,P-22_HM,BOMZH1	#N/A	unclear	7184
Contig870	1319	LINE	#N/A	#N/A	#N/A	LINE	7072
Contig1979	1317	Retro	#N/A	DM412_I,DNA2-1_SM	#N/A	Retro	100527
Contig1876	1313	LINE	#N/A	Academ-3_HM,HERVIP10FH,Gypsy-21_DAn-LTR	#N/A	LINE	8071
Contig1061	1312	DNA	#N/A	piggyBac-7_SM,Tc1-2Onc	#N/A	DNA Transposon	5428
Contig46	1311	LINE	#N/A	GYPSOL_I,Mariner-10_HM	#N/A	LINE	62333
R=1694 (RR=1683. TRF=0.000 NSEG=0.163)	1310	unclear	#N/A	Gypsy-6-I_XT	#N/A	unclear	609
R=3146 (RR=3133. TRF=0.458 NSEG=0.083)	1309	unclear	#N/A	Gypsy-5_DEr-LTR,hAT-5_HM	Sat_38	unclear	142972
Contig1675	1308	Retro	#N/A	Penelope-12_HM,hAT-N1_DEl	#N/A	Retro	46296
Contig2105	1307	unclear	#N/A	DNA5-1_SP	#N/A	unclear	5502
R=546 (RR=537. TRF=0.000 NSEG=0.260)	1307	LINE	#N/A	INVADER1_I,Rehavkus-3_TC,Kiri-5_CQ	#N/A	LINE	42676
Contig2518	1304	Retro	#N/A	DNA8-18B_AP,Polinton-2_HM	#N/A	Retro	4796
R=281 (RR=273. TRF=0.000 NSEG=0.072)	1300	LTR	#N/A	REX3,TZF28B,hAT-71_HM,HATN5A_DR	#N/A	LTR	33476
Contig1109	1298	unclear	#N/A	hAT-N79_DR,R5	#N/A	unclear	14848
Contig1821	1296	DNA	#N/A	ATGP3I	#N/A	DNA Transposon
Contig1568	1291	LTR	#N/A	L1-1_Cja,DNA-TA-7_DR,I-1_DAn	#N/A	LTR	31132
Contig392	1291	LINE	#N/A	Gypsy-48_GA-I,CHARLIE2	#N/A	LINE	88216
Contig214	1289	DNA	#N/A	ERV1-1_OPr-I,Jockey-1_DEl	#N/A	DNA Transposon	25772
Contig835	1289	unclear	#N/A	Daphne-18_HM	#N/A	unclear	65221
R=7069 (RR=7045. TRF=0.000 NSEG=0.088)	1288	DNA	#N/A	SINE2-1_AFC,AmnSINE1_HS	#N/A	DNA Transposon	30585
Contig1471	1283	LTR	#N/A	GIZMO1_EI,RMER12C	#N/A	LTR	22140
Contig1173	1279	Retro	#N/A	Gypsy-20_DEl-I,CYRA11_MM,Ginger2-1_LS	#N/A	Retro	5252
Contig438	1279	LTR	#N/A	L2,L2-2_CM,R4-1_ED,BARI1,BEL-12_DEl-I	#N/A	LTR	12155
Contig505	1277	unclear	#N/A	Charlie21a,TOM_I	#N/A	unclear	11340
Contig1338	1276	LINE	#N/A	CR1-61_AAe,Chapaev-3A_HM	#N/A	LINE	7829
Contig110	1275	DNA	#N/A	CHARLIE8A	#N/A	DNA Transposon	13410
R=9619 (RR=9587. TRF=0.000 NSEG=0.038)	1272	LINE	#N/A	#N/A	#N/A	LINE	7014
Contig1579	1269	LINE	#N/A	Gypsy-27_GA-I,Gypsy48-I_DR,Ag-Jock-1	#N/A	LINE	9764
Contig415	1265	LTR	#N/A	BEL-121_AA-I	#N/A	LTR	9200
Contig1701	1263	Retro	#N/A	NLT1_SP,Gypsy-4_PPP-I	#N/A	Retro	5659
Contig574	1255	Retro	#N/A	DNA-8-3_DR,CR1-55_HM	#N/A	Retro	12935
Contig1090	1252	unclear	#N/A	DNA-1-1_DR,MuDR4x_AP,CR1-X1_Pass	#N/A	unclear	11978
Contig1331	1250	DNA	#N/A	RETROFIT_I	#N/A	DNA Transposon	32863
Contig1569	1250	unclear	#N/A	MARINER67_CB	#N/A	unclear	6906
Contig2007	1249	unclear	#N/A	NERV5_MD_I	#N/A	unclear	5562
R=9239 (RR=9210. TRF=0.052 NSEG=0.129)	1248	unclear	#N/A	UnaL2	#N/A	unclear	44128
Contig743	1247	Retro	#N/A	LTR48	#N/A	Retro	5952
Contig784	1247	DNA	#N/A	EnSpm-3_PGr,Sola1-9_AP,P-1_PGr,piggyBac-1N1_XT	#N/A	DNA Transposon	5078
Contig911	1245	unclear	#N/A	HERVIP10FH,R5	#N/A	unclear	9387
Contig491	1243	LINE	#N/A	Gypsy37-I_DR,Gypsy-182_AA-I	#N/A	LINE	22813
R=3180 (RR=3167. TRF=0.257 NSEG=0.163)	1240	LINE	#N/A	Sola1-9_AP,Merlin-1_Hrobusta,Crack-17_BF	#N/A	LINE	48112
Contig2863	1238	LINE	#N/A	#N/A	#N/A	LINE	5582
Contig2607	1237	LTR	#N/A	hAT-83_HMa	#N/A	LTR	8999
Contig2054	1236	Retro	#N/A	CR1-116_AAe,TE-X-4_DR	#N/A	Retro	5509
Contig287	1236	Retro	#N/A	CER15-1-I_CE	#N/A	Retro	10894
Contig804	1236	LTR	#N/A	Copia-7_PR-I	#N/A	LTR	16972
R=2012 (RR=2001. TRF=0.000 NSEG=0.064)	1236	LINE	#N/A	EnSpm-4_DR,SMAR24,Gypsy-170_AA-I	#N/A	LINE	10560
Contig470	1235	unclear	#N/A	UnaL2	#N/A	unclear	11661
R=7167 (RR=7143. TRF=0.000 NSEG=0.079)	1233	unclear	#N/A	CR1-25_HM	#N/A	unclear	11815
Contig1561	1229	LINE	#N/A	MuDR4x_AP,ZOMBI	#N/A	LINE	5675
R=688 (RR=679. TRF=0.000 NSEG=0.057)	1228	LINE	#N/A	L1C_OC	#N/A	LINE	89728
Contig1697	1227	Retro	#N/A	TAHRE	#N/A	Retro	19268
Contig1356	1224	LINE	#N/A	Gypsy76-I_DR,Rehavkus-2_NVi,ATENSPM7,Crack-4_HM	#N/A	LINE	5754
Contig2910	1224	unclear	#N/A	REX1-2_XT,Polinton-3_TC	#N/A	unclear	83857
Contig546	1220	LINE	#N/A	#N/A	#N/A	LINE	60036
Contig1188	1218	Retro	#N/A	LTRTCA1	#N/A	Retro	14637
Contig1784	1218	LINE	#N/A	Gypsy-35_GA-I	#N/A	LINE	7581
Contig2018	1218	LTR	#N/A	FUGUREP4B	#N/A	LTR	88400
R=2622 (RR=2609. TRF=0.029 NSEG=0.025)	1218	LTR	mariner	Tc1-4Ory	#N/A	LTR	79522
Contig1546	1216	LTR	#N/A	LOR1I,Sola2-1_DPu	#N/A	LTR	24498
R=12470 (RR=12414. TRF=0.000 NSEG=0.049)	1214	DNA	#N/A	CR1_Ele41,DIRS-2_AMa,Mariner4_AO	#N/A	DNA Transposon	4925
Contig604	1213	LINE	#N/A	HERV39	#N/A	LINE	9698
Contig608	1213	LINE	#N/A	#N/A	#N/A	LINE	9685
R=9999 (RR=9966. TRF=0.000 NSEG=0.283)	1213	LTR	#N/A	TC1_FR3,Chapaev3-4_PM,HARLEQUIN,HELITRON13_CB	#N/A	LTR	33034
R=1343 (RR=1332. TRF=0.000 NSEG=0.084)	1210	unclear	gypsy	ERV1-2-I_XT,L1-64_XT	#N/A	unclear	33930
Contig388	1209	LINE	#N/A	Sola1-9_AP,Merlin-1_Hrobusta,Crack-17_BF	#N/A	LINE	3524
Contig1580	1207	DNA	#N/A	Daphne-18_HM,Gypsy-30_AA-I	#N/A	DNA Transposon	19530
Contig2198	1207	DNA	#N/A	Tc1-2Xt,L1-24B_ACar	#N/A	DNA Transposon	11710
Contig888	1207	unclear	#N/A	DOC5_DM	#N/A	unclear	5289
Contig103	1206	LINE	#N/A	MAUI,HERV17	#N/A	LINE	520754
Contig1638	1204	LINE	#N/A	TguERVK9_LTR2h,Tc1-4Ory	#N/A	LINE	16178
R=8500 (RR=8473. TRF=0.000 NSEG=0.051)	1204	DNA	#N/A	L1-3_Cis	#N/A	DNA Transposon	1081
R=1718 (RR=1707. TRF=0.000 NSEG=0.055)	1201	DNA	#N/A	Polinton-1_XT,Polinton-1_DR	#N/A	DNA Transposon	20689
R=186 (RR=180. TRF=0.081 NSEG=0.216)	1201	LINE	LINE	Rex1-1_PM,MINIME_DN,BEL-216_AA-I	#N/A	LINE	33926
Contig948	1200	LINE	#N/A	SYNPCS19X,MER6A	#N/A	LINE	14408
Contig372	1199	LINE	#N/A	HERVFH21I	#N/A	LINE	22745
Contig998	1199	Retro	#N/A	HERVS71	#N/A	Retro	32139
Contig889	1197	DNA	#N/A	TRAS6_BM	#N/A	DNA Transposon	10441
Contig1059	1196	DNA	#N/A	#N/A	#N/A	DNA Transposon	8007
Contig2455	1195	unclear	#N/A	DNA-AT-2_DR,KenoDr1,Mariner-3_PGr	#N/A	unclear	25401
Contig765	1191	unclear	#N/A	ATHAT2,Sola3-1_HM,Gypsy-2_IS-I	#N/A	unclear	15821
Contig200	1190	DNA	#N/A	Gypsy-13_Ano-I	#N/A	DNA Transposon	12088
Contig1749	1189	LINE	#N/A	Polinton-2_SM,CHARLIE10	#N/A	LINE	8814
Contig811	1189	DNA	#N/A	Gypsy-12-I_HM,Chapaev-2_ACa	#N/A	DNA Transposon	58145
Contig1724	1188	LTR	#N/A	TC1_FR3,Chapaev3-4_PM,HARLEQUIN,HELITRON13_CB	#N/A	LTR	172
Contig1115	1186	unclear	#N/A	#N/A	#N/A	unclear	9167
Contig406	1184	unclear	#N/A	#N/A	#N/A	unclear	12328
Contig1473	1183	unclear	#N/A	TE-X-5_DR	#N/A	unclear	15464
Contig643	1183	DNA	#N/A	#N/A	#N/A	DNA Transposon	14382
Contig731	1183	LINE	#N/A	SINE2-1_GA,DNA8-1_DR,KenoFr1	#N/A	LINE	10235
Contig2156	1181	DNA	#N/A	RandI-1,BEL-101_AA-I	#N/A	DNA Transposon	14441
R=1443 (RR=1432. TRF=0.000 NSEG=0.124)	1181	LINE	#N/A	tRNA-Arg-CGA	#N/A	LINE	16126
Contig1741	1179	LTR	#N/A	hAT-33_HM	#N/A	LTR	4982
Contig1613	1178	DNA	#N/A	#N/A	#N/A	DNA Transposon	14744
Contig551	1177	LINE	#N/A	L1_AC_8,ATENSPM8	#N/A	LINE	21586
Contig28	1176	LINE	#N/A	MDG1_I,L1MEe_5end,ERV3-1Na1a_MEu-LTR	#N/A	LINE	60617
Contig2256	1175	LINE	#N/A	Transib1N1_AA	#N/A	LINE	7474
Contig2088	1171	DNA	#N/A	HELITRON2_CE,CR1-89_HM	#N/A	DNA Transposon	97525
Contig818	1171	LINE	#N/A	#N/A	#N/A	LINE	6234
R=1937 (RR=1926. TRF=0.000 NSEG=0.035)	1171	Retro	#N/A	Gypsy1-I_GA,Gypsy-47_GA-LTR	#N/A	Retro	20524
Contig1001	1170	LTR	#N/A	L1-38_XT,L1-51_XT	#N/A	LTR	37933
Contig1013	1170	LINE	#N/A	TguERVL2b2_LTR,EnSpm-8_HM	#N/A	LINE	10891
Contig1045	1169	DNA	#N/A	Tc1-2_Xt,I_Ele39	#N/A	DNA Transposon	15062
Contig2106	1169	LINE	#N/A	Crack-2_BF,Crack-14_BF	#N/A	LINE	27732
Contig517	1169	unclear	#N/A	Gypsy-22_DWil-I,I_Ele4E_AAe	#N/A	unclear	1225
Contig275	1168	LINE	#N/A	ATMU9,HERO-2_BF,PERERE-5	#N/A	LINE	32386
Contig1559	1166	LINE	#N/A	EnSpm-1_BF,Mariner-3_ACar,Gypsy-43_DEl-I,Gypsy-23_GA-I	#N/A	LINE	4888
Contig324	1163	LINE	#N/A	Gypsy-208_AA-I,Gypsy136-I_DR	#N/A	LINE	30539
Contig1870	1159	LTR	#N/A	PRIMA4_I	#N/A	LTR	37987
R=8927 (RR=8899. TRF=0.000 NSEG=0.016)	1157	LINE	#N/A	MMETN	#N/A	LINE	9983
Contig88	1156	LINE	#N/A	L2,L2-2_CM	#N/A	LINE	51518
Contig1787	1155	DNA	#N/A	FERVR2_I,Gypsy-30_GA-I	#N/A	DNA Transposon	16457
R=7426 (RR=7402. TRF=0.000 NSEG=0.145)	1155	LINE	#N/A	TC1,BEL-41_CQ-I,Tx1-13_CQ	#N/A	LINE	15174
Contig489	1153	unclear	#N/A	NDNAX1_CE	#N/A	unclear	7092
Contig2380	1152	LINE	#N/A	MAUI,DIVER_I,TAS_I,BEL-628_AA-I,REX1-4_XT	#N/A	LINE	15212
R=978 (RR=967. TRF=0.000 NSEG=0.026)	1152	LINE	#N/A	Rex1-1_PM,Rex1-3_FR	#N/A	LINE	73454
Contig1327	1150	LINE	#N/A	SQR2_MM	#N/A	LINE	36400
Contig530	1148	unclear	#N/A	Gypsy-39_GA-I,ERV1-3-I_DR,Gypsy-163_AA-I,HELITRONY1D	#N/A	unclear	28877
Contig1190	1147	LINE	#N/A	#N/A	#N/A	LINE	8417
Contig879	1147	unclear	#N/A	#N/A	#N/A	unclear	14550
Contig938	1146	LTR	#N/A	CR1-4_BF,Penelope-13_HM	#N/A	LTR	21746
Contig1835	1145	unclear	#N/A	Helitron-1_HM,HELITRON4,Gypsy-9_XT-I	#N/A	unclear	6548
Contig867	1145	unclear	#N/A	Gypsy-6_AA-I	#N/A	unclear	4578
R=9923 (RR=9890. TRF=0.033 NSEG=0.168)	1143	LINE	#N/A	DNAX-1_TCa,Mariner-39_HM	#N/A	LINE	14750
Contig143	1141	LINE	#N/A	Gypsy-41_CQ-I,MuDR12x_AP	#N/A	LINE	74351
Contig1164	1140	LTR	#N/A	L1_AC_6,Ginger1-6_HM	#N/A	LTR	7360
Contig1616	1133	DNA	#N/A	LOOPERN6_DR,REP_DE	#N/A	DNA Transposon	4550
Contig211	1131	LINE	#N/A	I-1_NVi,DNA-4-1_HM	#N/A	LINE	21070
Contig710	1131	DNA	#N/A	hAT-21_HM,TC1,BEL-41_CQ-I,Tx1-13_CQ	#N/A	DNA Transposon	3266
R=3496 (RR=3482. TRF=0.000 NSEG=0.046)	1131	LINE	#N/A	ERE2_EH	#N/A	LINE	10445
Contig106	1126	LINE	#N/A	Copia-6_PSo-I,Gypsy-91_AA-I	#N/A	LINE	23847
Contig1804	1125	LINE	#N/A	DNAX-1_TCa,Mariner-39_HM	#N/A	LINE	1022
Contig708	1124	LTR	#N/A	FW2_DM,CarERV2	#N/A	LTR	8040
Contig1052	1120	LINE	#N/A	#N/A	#N/A	LINE	10559
Contig1107	1119	Retro	#N/A	Merlin-1_HM,Polinton-1_TC	#N/A	Retro	332796
Contig654	1119	DNA	#N/A	Copia4-NVi_I,R2Amel	#N/A	DNA Transposon	14577
Contig1390	1118	unclear	#N/A	BEL-231_AA-LTR,DNA-2-1_HM	#N/A	unclear	8737
Contig685	1116	Retro	#N/A	P-14_HM,TE-X-5_DR,hAT-56_HM	#N/A	Retro	15352
Contig261	1115	LTR	#N/A	EnSpm-6N1_DR,CR1-2_XT,SIMPLEHAT1	#N/A	LTR	12020
R=199 (RR=193. TRF=0.000 NSEG=0.088)	1115	LINE	#N/A	PIF_Harbinger-1_TreMes	#N/A	LINE	33303
Contig1100	1114	DNA	#N/A	Kolobok-2_Aplcal,CELE46B,CHARLIE1	#N/A	DNA Transposon	5651
Contig187	1113	DNA	#N/A	Tc1-2_Xt,Mariner-1_DR,MARINER55_CB	#N/A	DNA Transposon	35902
Contig2335	1112	LINE	#N/A	P-37_HMa,TE-2_XT	#N/A	LINE	3615
Contig942	1111	unclear	#N/A	Gypsy-20_DWil-I	#N/A	unclear	4442
R=4286 (RR=4268. TRF=0.035 NSEG=0.142)	1111	DNA	#N/A	#N/A	#N/A	DNA Transposon	4604
Contig1243	1107	unclear	#N/A	Polinton-3_HM	#N/A	unclear
Contig1440	1107	DNA	#N/A	Sola1-11_AP,hAT6-1N1_SP	#N/A	DNA Transposon	4432
Contig1299	1106	DNA	#N/A	Tc1-4Ory,HERV-K14CI	#N/A	DNA Transposon	25351
Contig1771	1106	DNA	#N/A	DIRS-9A_XT	#N/A	DNA Transposon	5432
Contig291	1106	LINE	#N/A	#N/A	#N/A	LINE	15473
Contig1510	1105	unclear	#N/A	hAT-30_HM,Gypsy-8_PSo-I	#N/A	unclear	8557
Contig244	1105	LINE	#N/A	#N/A	#N/A	LINE	25230
Contig2527	1104	unclear	#N/A	#N/A	#N/A	unclear	6408
Contig1199	1103	LTR	#N/A	#N/A	#N/A	LTR	4612
Contig1028	1101	LINE	#N/A	L1-1_Ttr,SZ-19LTR,CR1-28_HM	#N/A	LINE	8357
Contig1843	1096	Retro	#N/A	Gypsy-4_GA-I	#N/A	Retro	11005
Contig1071	1093	unclear	#N/A	BEL-1_DAn-I	#N/A	unclear	547
Contig36	1093	DNA	#N/A	BBSINE1,Tc1-1Neo,Gypsy-15_DEl-I,TCB2	#N/A	DNA Transposon	136385
R=6887 (RR=6863. TRF=0.000 NSEG=0.095)	1091	LTR	#N/A	#N/A	#N/A	LTR	1491
Contig1047	1089	Retro	#N/A	HARLEQUIN	#N/A	Retro	4716
Contig1974	1089	LINE	#N/A	ERV1-N1-I_DR	#N/A	LINE	18715
R=6712 (RR=6690. TRF=0.000 NSEG=0.000)	1087	LTR	#N/A	CR1-13_SP	#N/A	LTR	9151
Contig2504	1084	LINE	#N/A	#N/A	#N/A	LINE	3952
Contig2154	1083	LINE	#N/A	Gypsy-91_AA-I,Crack-6_CQ	#N/A	LINE	199683
Contig579	1081	LTR	#N/A	Gypsy-3_GA-I,DIRS-1_ACas	#N/A	LTR	9544
R=1722 (RR=1711. TRF=0.000 NSEG=0.049)	1081	LINE	#N/A	#N/A	#N/A	LINE	17054
Contig196	1080	Retro	#N/A	MuDR12x_AP,CR1_Ele40	#N/A	Retro	56492
Contig516	1080	LTR	#N/A	REX1-4_AFC,HAT1_DR	#N/A	LTR	7911
R=9481 (RR=9451. TRF=0.000 NSEG=0.070)	1079	LTR	#N/A	Helitron-1_HM,MLT1H_I	#N/A	LTR	60996
Contig1149	1076	DNA	#N/A	Ambal-2_FCy	#N/A	DNA Transposon	4300
Contig1738	1076	unclear	#N/A	hATm-25_HM,Copia-47_BG-I,HAL1-2A_Cho,Outcast-19_AAe	#N/A	unclear	15457
Contig2484	1075	DNA	#N/A	hAT-68_HM	#N/A	DNA Transposon	3225
Contig2394	1074	LTR	#N/A	LINE2B_CE	#N/A	LTR	5915
R=5016 (RR=4997. TRF=0.000 NSEG=0.079)	1074	LINE	#N/A	Polinton-2_CB	#N/A	LINE	8126
Contig1119	1073	DNA	#N/A	#N/A	#N/A	DNA Transposon	73223
Contig2137	1073	unclear	#N/A	EnSpm-7_HM	#N/A	unclear	3375
Contig671	1072	DNA	#N/A	CR1-48_HM,ATHILA4C_I	#N/A	DNA Transposon	8988
Contig94	1072	LTR	#N/A	Copia-4_PPa-I	#N/A	LTR	31903
R=3528 (RR=3513. TRF=0.000 NSEG=0.278)	1071	DNA	#N/A	G3_DM,DNA-TA-6_DR	T_213a,T_261	DNA Transposon	27523
R=4912 (RR=4893. TRF=0.000 NSEG=0.048)	1070	DNA	#N/A	RTE-1_GA	#N/A	DNA Transposon	56065
Contig8	1067	LTR	#N/A	TV1I,Polinton1_SM,RTEX-11_BF,Gypsy-7_OD-I,Copia-3_CQ-I,L1ME3A	#N/A	LTR	388277
Contig1098	1066	unclear	#N/A	Gypsy-23_DEl-I	#N/A	unclear	8749
Contig1786	1064	LINE	#N/A	CR1-61_HM	#N/A	LINE	32654
R=3068 (RR=3055. TRF=0.000 NSEG=0.000)	1064	LINE	#N/A	MAUI	#N/A	LINE	15802
Contig312	1061	DNA	#N/A	REP7_XT,TV1I	#N/A	DNA Transposon	9512
R=1987 (RR=1976. TRF=0.000 NSEG=0.074)	1061	unclear	#N/A	ATCOPIA8AI,CR1-13_SP	#N/A	unclear	9348
Contig2063	1060	LINE	#N/A	Gypsy56-I_DR	#N/A	LINE	6753
Contig1373	1055	DNA	#N/A	TC1_TF,Tc1-2Ory,TCB1,TDR18	#N/A	DNA Transposon	52559
R=2610 (RR=2597. TRF=0.000 NSEG=0.068)	1051	DNA	#N/A	Charlie21a,L1-55_XT,L1-12A_XT,hATm-43_HM	#N/A	DNA Transposon	2348
Contig1871	1050	DNA	#N/A	Tc1-9_Xt,HELITRON5	#N/A	DNA Transposon	16328
Contig994	1050	DNA	#N/A	Gypsy-13_CQ-I	#N/A	DNA Transposon	5482
Contig1408	1048	unclear	#N/A	DNAX-1_AP	#N/A	unclear	7894
Contig203	1047	DNA	#N/A	hAT-5_SM,Talua,L1-2_EC,DNA-3-5_DR	#N/A	DNA Transposon	29739
R=3604 (RR=3588. TRF=0.321 NSEG=0.087)	1047	Retro	#N/A	Polinton-1_EI	#N/A	Retro	30403
Contig2055	1046	DNA	#N/A	CR1-28_HM,Kolobok-2_XT,Gypsy-40_GA-I	#N/A	DNA Transposon	10097
R=190 (RR=184. TRF=0.000 NSEG=0.000)	1043	DNA	hAT	hAT-12_XT,hAT-N2_FR,hAT-6_HM	#N/A	DNA Transposon	87102
Contig1070	1040	LTR	#N/A	EnSpm-2N1_HM,PRIMA4_I	#N/A	LTR	4339
Contig1673	1040	LINE	#N/A	Gypsy-13-I_XT,ZAM_I,GYPSOL_I	#N/A	LINE	10654
R=8739 (RR=8711. TRF=0.000 NSEG=0.052)	1040	LINE	#N/A	Helitron-1_HM,MLT1H_I	#N/A	LINE	1573
Contig22	1039	LINE	#N/A	TRILLIAN1,TRILLIAN2,Gypsy-30-I_NVi,HERVKC4,DNA2-9_CB	#N/A	LINE	297930
R=2650 (RR=2637. TRF=0.000 NSEG=0.152)	1038	LINE	#N/A	Poseidon_Hyd	#N/A	LINE	10406
Contig987	1037	LINE	#N/A	Gypsy-33-I_DR	#N/A	LINE	4395
Contig148	1034	LINE	#N/A	Tc1-17a_Xen,Mariner-1_BF,Gypsy-90_MLP-I,P-30_HM	#N/A	LINE	37775
Contig1800	1034	LINE	#N/A	Transib1,Daphne-15_SP	#N/A	LINE	16953
Contig251	1031	LTR	#N/A	MER58D	#N/A	LTR	71844
Contig221	1027	DNA	#N/A	#N/A	#N/A	DNA Transposon	20898
R=2040 (RR=2029. TRF=0.000 NSEG=0.074)	1026	LINE	#N/A	#N/A	#N/A	LINE	12101
Contig397	1025	LINE	#N/A	Polinton-5_NVi,TE-X-4_DR,MuDRF-2_MLP	#N/A	LINE	6489
Contig525	1025	LINE	#N/A	Gypsy-35_GA-I,Gypsy-38_GA-I	#N/A	LINE	18757
Contig2187	1022	LINE	#N/A	#N/A	#N/A	LINE	3769
Contig1245	1021	DNA	#N/A	#N/A	#N/A	DNA Transposon	7831
Contig177	1020	Retro	#N/A	I-7C_AAe	#N/A	Retro	2070
Contig2120	1019	LINE	#N/A	MARINER47_CB	#N/A	LINE	6685
Contig442	1017	DNA	#N/A	OSMAR1	#N/A	DNA Transposon	9582
Contig825	1017	DNA	#N/A	Polinton-1_SM,P-24_HM	#N/A	DNA Transposon	6100
Contig1575	1016	unclear	#N/A	BEL-8_GA-I	#N/A	unclear	10174
Contig1066	1015	DNA	#N/A	hAT-73_HM,Polinton-3_HM,P-5_HM,hAT-53_HM	#N/A	DNA Transposon	4727
Contig1262	1015	LINE	#N/A	#N/A	#N/A	LINE
Contig1477	1014	DNA	#N/A	#N/A	#N/A	DNA Transposon
Contig2627	1014	LINE	#N/A	L2-2_Cis	#N/A	LINE	102345
R=4749 (RR=4731. TRF=0.000 NSEG=0.075)	1013	DNA	#N/A	Gypsy-35_DAn-I,TDR8B	#N/A	DNA Transposon	4441
R=1828 (RR=1817. TRF=0.298 NSEG=0.090)	1011	unclear	#N/A	Polinton-1_EI	#N/A	unclear	4389
Contig379	1009	LTR	#N/A	EnSpm-2N1_HM	#N/A	LTR	87716
Contig821	1009	unclear	#N/A	CR1-61_HM,HAL1-1_Opr,Sola3-3_HM,LTR16_Pca,Copia-1_AC-I	#N/A	unclear	8756
Contig1306	1006	Retro	#N/A	KoshiTn1	#N/A	Retro	33290
Contig167	1006	LINE	#N/A	BEL-8_DEl-I,Sola1-N1_AAe,Kiri-38_AAe	#N/A	LINE	18427
Contig989	1006	DNA	#N/A	#N/A	#N/A	DNA Transposon	12197
R=7485 (RR=7461. TRF=0.000 NSEG=0.141)	1005	DNA	#N/A	hAT-69_HM,Ambal-3N1_FCy	#N/A	DNA Transposon	16598
R=9458 (RR=9428. TRF=0.000 NSEG=0.068)	1005	DNA	#N/A	#N/A	#N/A	DNA Transposon	8035
R=449 (RR=440. TRF=0.000 NSEG=0.071)	1003	LINE	#N/A	Ambal-2_FCy	#N/A	LINE	42947
Contig23	1000	DNA	#N/A	Tc1-4Ory	#N/A	DNA Transposon	785364
Contig315	999	LINE	#N/A	REX1-1_GA	#N/A	LINE	46611
Contig1050	998	DNA	#N/A	Crack-3_HM	#N/A	DNA Transposon	25044
R=1910 (RR=1899. TRF=0.000 NSEG=0.075)	998	LINE	#N/A	Gypsy-6_GA-I	#N/A	LINE	17560
R=6585 (RR=6563. TRF=0.000 NSEG=0.034)	998	LINE	#N/A	TguERV4N1_I	#N/A	LINE	14493
R=3093 (RR=3080. TRF=0.000 NSEG=0.181)	996	Retro	#N/A	R4-1_ED,BARI1,BEL-12_DEl-I	#N/A	Retro	12453
Contig527	995	DNA	#N/A	#N/A	#N/A	DNA Transposon	3978
R=5384 (RR=5364. TRF=0.000 NSEG=0.058)	994	LINE	#N/A	MER6A,SINE_TE	#N/A	LINE	115789
R=1491 (RR=1480. TRF=0.000 NSEG=0.000)	993	DNA	#N/A	#N/A	#N/A	DNA Transposon	11656
Contig100	992	unclear	#N/A	RTEX-9_BF	#N/A	unclear	74238
Contig1031	992	LTR	#N/A	#N/A	#N/A	LTR	5578
Contig1948	991	LTR	#N/A	L1_SS,Neptune3_Ren	#N/A	LTR	4011
Contig1143	990	DNA	#N/A	SINE2-8_SP	#N/A	DNA Transposon	127250
Contig1980	990	DNA	#N/A	SMAR21,Gypsy49-I_DR	#N/A	DNA Transposon	3758
Contig1386	988	DNA	#N/A	ZOMBI	#N/A	DNA Transposon	30787
Contig2804	988	LINE	#N/A	#N/A	#N/A	LINE	4924
Contig1783	987	LTR	#N/A	CR1_Ele39,CR1-48_HM	#N/A	LTR	5945
R=8820 (RR=8792. TRF=0.000 NSEG=0.030)	984	LINE	#N/A	#N/A	#N/A	LINE
R=8583 (RR=8556. TRF=0.136 NSEG=0.022)	982	unclear	#N/A	hAT-8_SM	T_213a,T_213b,T_261	TR	991723
Contig1985	979	LTR	#N/A	ERV1-1_OPr-I,Gypsy163-I_DR,Gypsy-102_MLP-I	#N/A	LTR	12305
R=280 (RR=272. TRF=0.000 NSEG=0.161)	977	LINE	#N/A	CR1-39_HM	#N/A	LINE	52278
Contig2412	976	DNA	#N/A	#N/A	#N/A	DNA Transposon	8065
Contig2533	976	LINE	#N/A	#N/A	#N/A	LINE	2928
Contig2227	975	DNA	#N/A	Gypsy22-I_Dpse,Transib1_Dmoj	#N/A	DNA Transposon	4532
Contig609	974	LINE	#N/A	#N/A	#N/A	LINE	9828
Contig617	973	unclear	#N/A	ERV2-2B_BT-I,Hoana7,Kolobok-1_AA	#N/A	unclear	5835
R=1557 (RR=1546. TRF=0.000 NSEG=0.000)	971	LINE	#N/A	#N/A	#N/A	LINE	10493
R=4605 (RR=4587. TRF=0.000 NSEG=0.000)	970	DNA	#N/A	Gypsy75-I_DR	#N/A	DNA Transposon	6382
Contig992	969	unclear	#N/A	#N/A	#N/A	unclear	6484
R=14580 (RR=14507. TRF=0.000 NSEG=0.051)	969	unclear	#N/A	MER6A,ERV6_MD_I,SINE_TE	#N/A	unclear	43401
Contig1849	968	unclear	#N/A	hATw-3_HM,Daphne-65_HMa,hAT-6_XT	#N/A	unclear	4925
Contig907	968	unclear	#N/A	TART_DV	#N/A	unclear	4151
Contig1478	967	DNA	#N/A	ATGP8LTR,Crack-19_AAe	#N/A	DNA Transposon	10499
Contig1629	967	LTR	#N/A	#N/A	#N/A	LTR	5787
R=1243 (RR=1232. TRF=0.000 NSEG=0.103)	967	LINE	#N/A	COPIA_DM_I	#N/A	LINE	14629
R=613 (RR=604. TRF=0.000 NSEG=0.127)	966	LINE	#N/A	ACROBAT1,ERV54-EC_I	#N/A	LINE	20797
R=4815 (RR=4796. TRF=0.050 NSEG=0.083)	965	DNA	#N/A	TRILLIAN1,TRILLIAN2	#N/A	DNA Transposon	10773
R=5189 (RR=5169. TRF=0.000 NSEG=0.054)	962	LINE	#N/A	#N/A	#N/A	LINE	17009
Contig1332	961	DNA	#N/A	Copia-57_MLP-LTR,Helitron-1_BM	#N/A	DNA Transposon	13402
Contig2125	960	DNA	#N/A	#N/A	#N/A	DNA Transposon	10508
Contig1573	958	unclear	#N/A	#N/A	#N/A	unclear	5819
Contig1943	958	LINE	#N/A	Copia-4_PSt-I,ERV42_MD_I	#N/A	LINE	31047
Contig2252	958	LINE	#N/A	L1-1_Vpa,EnSpm-15_HM	#N/A	LINE	3092
R=3362 (RR=3349. TRF=0.000 NSEG=0.048)	953	unclear	#N/A	#N/A	#N/A	unclear	14293
Contig1182	952	LINE	#N/A	CR1-9_HM	#N/A	LINE	27418
Contig1288	952	LTR	#N/A	Gypsy-106_MLP-I,L2-2_CM,Harbinger-1_PGr	#N/A	LTR	15041
Contig1378	952	Retro	#N/A	ATHAT10,Poseidon-2_HM,Chapaev-2_HM	#N/A	Retro	4444
Contig1912	946	unclear	#N/A	#N/A	#N/A	unclear	9746
Contig919	946	LINE	#N/A	TC1_DM,NERV3_MD_I,Clu-137B_AG,P-18_HM	#N/A	LINE	3755
R=9106 (RR=9077. TRF=0.000 NSEG=0.131)	943	DNA	#N/A	HAL1-1A_Cho,Rehavkus-1_HR	#N/A	DNA Transposon	5915
Contig1699	942	LINE	#N/A	#N/A	#N/A	LINE	7890
R=285 (RR=277. TRF=0.494 NSEG=0.347)	942	LTR	cacta	Gypsy-8N_PPa-LTR	#N/A	LTR	36266
Contig2013	941	unclear	#N/A	#N/A	#N/A	unclear	11940
R=10301 (RR=10264. TRF=0.000 NSEG=0.071)	941	DNA	#N/A	Penelope-7_XT,GYPSY2_I	#N/A	DNA Transposon	15353
R=11618 (RR=11572. TRF=0.000 NSEG=0.166)	940	unclear	#N/A	TC2_FR5,P-17_HM	#N/A	unclear	5018
Contig164	939	Retro	#N/A	#N/A	#N/A	Retro	28115
Contig2195	937	LINE	#N/A	#N/A	#N/A	LINE	4363
Contig432	937	LINE	#N/A	#N/A	#N/A	LINE	10259
Contig2026	935	Retro	#N/A	Tad1-1_BG	#N/A	Retro	191730
R=1358 (RR=1347. TRF=0.000 NSEG=0.083)	935	DNA	#N/A	REX1-5_XT,GYPSOL_LTR,Tc1-4Ory,Gypsy-36_OD-I	T_213a,T_213b,T_261	DNA Transposon	4127
Contig108	934	LTR	#N/A	#N/A	#N/A	LTR	14915
Contig2028	934	DNA	#N/A	Polinton-1_HM	#N/A	DNA Transposon	92095
Contig487	934	DNA	#N/A	#N/A	#N/A	DNA Transposon	14139
Contig1192	932	unclear	#N/A	MER41G	#N/A	unclear	6833
Contig2506	932	LINE	#N/A	Tc1-4Ory	#N/A	LINE	190770
Contig2849	932	unclear	#N/A	MER6,ERV6_MD_I,SINE_TE	#N/A	unclear	2767
Contig230	931	LINE	#N/A	REX1-4_AFC,Rex1-3_FR,BovB_VA	#N/A	LINE	36803
Contig411	929	unclear	#N/A	Gypsy-619_AA-I,Tx1_XT	#N/A	unclear	10004
Contig1038	928	DNA	#N/A	#N/A	#N/A	DNA Transposon	8128
Contig1118	928	LINE	#N/A	#N/A	#N/A	LINE	4125
Contig1136	928	DNA	#N/A	MAX_I	#N/A	DNA Transposon	4554
Contig1132	927	DNA	#N/A	Gypsy-49_MLP-I,hAT-1_MEu	#N/A	DNA Transposon	5680
Contig945	927	LTR	#N/A	CR1-73_AAe	#N/A	LTR	4555
R=10872 (RR=10831. TRF=0.029 NSEG=0.092)	926	LINE	mariner	TC1_PP,hAT-7_SM	#N/A	LINE	15432
Contig560	925	DNA	#N/A	Penelope-7_XT,GYPSY2_I	#N/A	DNA Transposon	1522
Contig1218	924	DNA	#N/A	Ginger2-1_LS	#N/A	DNA Transposon	3769
Contig2260	924	LINE	#N/A	Gypsy-79_AA-I,Gypsy-8N_PPa-LTR,RTEX-13_BF	#N/A	LINE	2818
Contig648	924	LINE	#N/A	#N/A	#N/A	LINE	11754
Contig1328	923	Retro	#N/A	#N/A	#N/A	Retro	21897
Contig833	921	Retro	#N/A	Gypsy-24-LTR_XT	#N/A	Retro	4127
R=684 (RR=675. TRF=0.000 NSEG=0.085)	921	LINE	#N/A	Ginger1-1_AC,Gypsy-45_MLP-I	#N/A	LINE	64710
Contig1037	920	unclear	#N/A	SZ-43LTR	#N/A	unclear	19564
Contig13	919	unclear	#N/A	TC2_FR5,TC2_FR3A,P-17_HM	#N/A	unclear	38245
Contig2264	919	unclear	#N/A	Gypsy-21_DAn-LTR,BEL4-I_AG	#N/A	unclear	12094
Contig1395	918	DNA	#N/A	#N/A	#N/A	DNA Transposon	3663
Contig1494	918	LTR	#N/A	Penelope-10_HM	#N/A	LTR	476010
R=5191 (RR=5171. TRF=0.034 NSEG=0.047)	918	unclear	#N/A	#N/A	#N/A	unclear	11446
Contig2065	916	Retro	#N/A	MINIME_DN,Gypsy-229_AA-I	#N/A	Retro	6107
R=6365 (RR=6344. TRF=0.104 NSEG=0.092)	916	LINE	#N/A	CR1-37_DR,Helitron-5_SMo,ERV35_MD_I	#N/A	LINE	20948
Contig2010	913	LINE	#N/A	Novosib-5_CR,VANDAL2N1	#N/A	LINE	3650
Contig1179	911	LINE	#N/A	#N/A	#N/A	LINE	5609
Contig2188	909	unclear	#N/A	hAT-26_HM	#N/A	unclear	4737
Contig836	908	unclear	#N/A	#N/A	#N/A	unclear	41501
Contig2155	907	LINE	#N/A	HERVKC4,HERV-K14CI	#N/A	LINE	25437
Contig2714	906	Retro	#N/A	BEL-1_GA-I	#N/A	Retro	2718
Contig2904	906	LTR	#N/A	#N/A	#N/A	LTR	16850
Contig382	906	Retro	#N/A	Polinton-1_HM	#N/A	Retro	12287
R=1186 (RR=1175. TRF=0.000 NSEG=0.202)	906	LINE	hAT	#N/A	#N/A	LINE	8598
R=1798 (RR=1787. TRF=0.134 NSEG=0.024)	906	LTR	#N/A	CACTA-1_CapOwc	#N/A	LTR	12875
Contig2399	905	LINE	#N/A	Sola3-1_BF	#N/A	LINE	13761
Contig1896	904	unclear	#N/A	#N/A	#N/A	unclear	3744
Contig969	904	LINE	#N/A	HERVI	#N/A	LINE	3701
R=7088 (RR=7064. TRF=0.000 NSEG=0.000)	904	Retro	#N/A	Gypsy73-I_DR	#N/A	Retro	7710
Contig249	902	unclear	#N/A	KoshiTn1,L1-15_DR,Tx1-5_FR	#N/A	unclear	15586
Contig393	901	Retro	#N/A	#N/A	#N/A	Retro	744
R=11060 (RR=11017. TRF=0.000 NSEG=0.024)	900	unclear	#N/A	ENSPM-6_DR,Ci000025	#N/A	unclear	47466
Contig1594	898	LINE	#N/A	#N/A	#N/A	LINE	8720
Contig2365	898	LTR	#N/A	L1-26_ACar,FUGUREP2	#N/A	LTR	181596
R=176 (RR=170. TRF=0.000 NSEG=0.189)	898	DNA	#N/A	Kolobok-2_XT,hAT-N54_DR,DM412_I,P-24_HM	#N/A	DNA Transposon	191072
R=1874 (RR=1863. TRF=0.000 NSEG=0.105)	898	LINE	#N/A	copia-3-I_AN,EnSpm-12_HM	#N/A	LINE	15952
Contig791	896	unclear	#N/A	Crack-10_BF,DNA-2-2_HM	#N/A	unclear	5148
R=511 (RR=502. TRF=0.000 NSEG=0.098)	896	DNA	#N/A	DNA8-71B_AP,NAVIRTE1	#N/A	DNA Transposon	76204
Contig1406	894	LINE	#N/A	L1-1_OP	#N/A	LINE	3623
R=1679 (RR=1668. TRF=0.000 NSEG=0.048)	894	LINE	#N/A	Polinton-2_SP,Gypsy-13_RO-I	#N/A	LINE	32657
R=6968 (RR=6944. TRF=0.028 NSEG=0.000)	893	LTR	#N/A	#N/A	#N/A	LTR	11189
Contig1679	892	Retro	#N/A	Gypsy-29_DPu-I	#N/A	Retro	4939
Contig571	891	unclear	#N/A	#N/A	#N/A	unclear	10828
Contig732	887	DNA	#N/A	#N/A	#N/A	DNA Transposon	12179
Contig751	885	LINE	#N/A	#N/A	#N/A	LINE	5358
Contig1457	884	DNA	#N/A	#N/A	#N/A	DNA Transposon	78068
Contig979	884	DNA	#N/A	#N/A	#N/A	DNA Transposon	20947
Contig237	883	LINE	#N/A	#N/A	#N/A	LINE	15362
Contig2469	883	Retro	#N/A	Sola2-1_HM,BEL-156_AA-I	#N/A	Retro	2649
Contig325	883	LINE	#N/A	TAHRE	#N/A	LINE	23953
R=325 (RR=317. TRF=0.000 NSEG=0.111)	883	DNA	mariner	MARINER18_CB,Mariner1_DYa	#N/A	DNA Transposon	29360
R=861 (RR=850. TRF=0.343 NSEG=0.058)	883	DNA	#N/A	MARINER37_CB	Sat_38	DNA, TR	5227
R=2872 (RR=2859. TRF=0.000 NSEG=0.186)	882	unclear	#N/A	Helitron-2_HM,GYPSY9_I,TDR5	#N/A	unclear	6478
Contig930	881	unclear	#N/A	MERMITE-18	#N/A	unclear	4953
Contig983	881	LINE	#N/A	LIN14_SM	#N/A	LINE	7187
R=10120 (RR=10086. TRF=0.000 NSEG=0.000)	881	LINE	#N/A	tRNA-Arg-CGA	#N/A	tRNA	15334
Contig212	880	LINE	#N/A	Crack-2_SP,hAT-71_HM	#N/A	LINE	19928
Contig817	880	LINE	#N/A	Gypsy-16_DWil-I,L2-1_DR	#N/A	LINE	22524
Contig2024	879	Retro	#N/A	Gypsy-1-I_MI	#N/A	Retro	23198
R=6164 (RR=6143. TRF=0.000 NSEG=0.484)	879	LINE	#N/A	HMSBEAGLE_I,Mariner-36_HM,DNA-4_AN	#N/A	LINE	7990
Contig1400	878	LINE	#N/A	L1-1_Ttr,CR1-72_HM	#N/A	LINE	13199
Contig1669	878	LINE	#N/A	#N/A	#N/A	LINE	251427
Contig1772	877	DNA	#N/A	Gypsy-11_SMo-I	#N/A	DNA Transposon	6522
Contig875	877	unclear	#N/A	ERV1-1N-EC_I	#N/A	unclear	4973
Contig1899	876	LINE	#N/A	#N/A	#N/A	LINE	7588
Contig2633	876	LTR	#N/A	#N/A	#N/A	LTR	2628
Contig956	876	LINE	#N/A	#N/A	#N/A	LINE	26203
Contig2035	875	LINE	#N/A	HERV19I	#N/A	LINE	8080
R=7598 (RR=7574. TRF=0.000 NSEG=0.079)	875	LTR	#N/A	#N/A	#N/A	LTR	8797
Contig950	874	LINE	#N/A	YIREN,HAL1-4_Cho	#N/A	LINE	3499
R=13862 (RR=13796. TRF=0.432 NSEG=0.019)	874	unclear	#N/A	Transib-12_HM,ERV1-1-I_Tbel	#N/A	unclear	5577
R=4869 (RR=4850. TRF=0.000 NSEG=0.108)	873	DNA	#N/A	L1MCA_5	#N/A	DNA Transposon	17528
Contig690	872	LINE	#N/A	#N/A	#N/A	LINE	14962
Contig1082	870	DNA	#N/A	Perere_Smed,TE-2-1_DR,CEMUDR1	#N/A	DNA Transposon	3484
Contig1191	870	DNA	#N/A	Gypsy-47_AA-I	#N/A	DNA Transposon	32143
Contig1072	869	Retro	#N/A	TguLTRK2d_I,L2B-5_AAe,ETnERV3	#N/A	Retro	3683
Contig199	868	Retro	#N/A	Copia-6_CQ-I,Ginger2-1_LS,HELITRONY3	#N/A	Retro	11407
Contig977	868	LINE	#N/A	ATCOPIA67_I,L1-37_XT	#N/A	LINE	4901
R=2126 (RR=2113. TRF=0.000 NSEG=0.095)	866	DNA	#N/A	Helitron-1_HM,Gypsy-25_DEl-I,OSMU6	#N/A	DNA Transposon	2210
R=4941 (RR=4922. TRF=0.000 NSEG=0.074)	864	LTR	#N/A	MAUI,hAT-N74_DR,Polinton-1_SP	#N/A	LTR	42110
Contig1542	863	unclear	#N/A	HATN5_DR	#N/A	unclear	6170
Contig380	863	LTR	#N/A	#N/A	#N/A	LTR
Contig850	862	LTR	#N/A	P-27_HM,HERV39	#N/A	LTR	6135
Contig961	857	LINE	#N/A	Transib1_NVi,XMTX1_LTR	#N/A	LINE	6848
Contig1363	856	LTR	#N/A	ERV1-6-I_XT,Helitron-1_DR,Kolobok-N4_DR	#N/A	LTR	28043
Contig1445	856	LINE	#N/A	KoshiTn1	#N/A	LINE	3552
R=3677 (RR=3661. TRF=0.000 NSEG=0.044)	856	LTR	#N/A	DNA8-38_AP	#N/A	LTR	17619
Contig1131	855	LINE	#N/A	#N/A	#N/A	LINE	3752
Contig2860	855	LTR	#N/A	DNA-8_PSt	#N/A	LTR	16119
Contig2773	853	LINE	#N/A	#N/A	#N/A	LINE	3582
R=1417 (RR=1406. TRF=0.096 NSEG=0.409)	853	LINE	ISC1316	I-3_DAn,Tx1-2_XT,MMERVK10D3_I,Penelope-5_HM	#N/A	LINE	1916
Contig1748	852	DNA	#N/A	#N/A	#N/A	DNA Transposon	3403
Contig1006	850	LINE	#N/A	tRNA-Arg-CGA	#N/A	LINE
Contig2083	850	DNA	#N/A	Gypsy-30_GA-I	#N/A	DNA Transposon	8233
Contig2204	849	DNA	#N/A	hAT-N1_CQ	#N/A	DNA Transposon	2579
Contig2848	849	DNA	#N/A	#N/A	#N/A	DNA Transposon	2547
R=1394 (RR=1383. TRF=0.073 NSEG=0.229)	849	unclear	#N/A	KoshiTn1	#N/A	unclear	79844
Contig2045	848	LTR	#N/A	RETROSAT3_I	#N/A	LTR	10891
Contig485	847	LTR	#N/A	Helitron-N1_SP	#N/A	LTR	145923
Contig270	845	DNA	#N/A	#N/A	#N/A	DNA Transposon	9355
Contig673	845	DNA	#N/A	TDR2,Tc1-2Xt	#N/A	DNA Transposon	9791
R=93 (RR=91. TRF=0.039 NSEG=0.084)	843	DNA	#N/A	#N/A	#N/A	DNA Transposon	219049
Contig1034	842	unclear	#N/A	#N/A	#N/A	unclear	16847
Contig2659	842	LINE	#N/A	CR1-13_SP	#N/A	LINE	2526
Contig1287	841	DNA	#N/A	MERLIN3_CB	#N/A	DNA Transposon	3246
R=7172 (RR=7148. TRF=0.000 NSEG=0.086)	841	LINE	#N/A	#N/A	#N/A	LINE	5990
Contig2887	840	LINE	#N/A	BEL-1_GA-I	#N/A	LINE	7473
Contig1708	838	LINE	#N/A	ZAPHOD,P-32_HM	#N/A	LINE	120604
R=454 (RR=445. TRF=0.000 NSEG=0.132)	838	Retro	#N/A	Crack-5_HM	#N/A	Retro	16019
Contig1902	837	Retro	#N/A	TE-2_XT	#N/A	Retro	4215
Contig2123	837	LTR	#N/A	#N/A	#N/A	LTR	6143
Contig319	837	LTR	#N/A	Helitron-2_DR,HEL	#N/A	LTR	11205
R=9448 (RR=9418. TRF=0.000 NSEG=0.055)	837	Retro	#N/A	#N/A	#N/A	Retro	9440
R=9521 (RR=9491. TRF=0.000 NSEG=0.135)	837	unclear	#N/A	DNA-AT-2_DR,DNA2-9_CB,TguLTR5a	#N/A	unclear	67601
Contig413	836	DNA	#N/A	#N/A	#N/A	DNA Transposon	151513
R=902 (RR=891. TRF=0.000 NSEG=0.000)	835	LTR	#N/A	#N/A	#N/A	LTR	5013
Contig1928	834	unclear	#N/A	GYPSY11_I	#N/A	unclear	3877
Contig98	834	LTR	#N/A	Gypsy-7_XT-LTR,Gypsy17-I_Dpse,L1-41_XT,LTR3_Dor	#N/A	LTR	15545
Contig1407	833	LTR	#N/A	#N/A	#N/A	LTR	4957
Contig354	832	LTR	#N/A	Gypsy-53_DEl-I	#N/A	LTR	22330
R=8114 (RR=8089. TRF=0.000 NSEG=0.088)	832	LINE	#N/A	Gypsy-6_AC-I	#N/A	LINE	5530
Contig1467	831	LTR	#N/A	Gypsy-34_DAn-I	#N/A	LTR	3425
Contig1570	831	unclear	#N/A	HERVIP10FH	#N/A	unclear	66139
Contig166	830	DNA	#N/A	MARINER_OL,L1-5_HM	#N/A	DNA Transposon	10280
Contig1381	829	LTR	#N/A	KoshiTn1,Gypsy68-I_DR,TguLTRK1_I,L1-3_CR	#N/A	LTR	13456
Contig2257	829	Retro	#N/A	Mariner-5_SM	#N/A	Retro	20778
Contig61	828	DNA	#N/A	ONSATB	#N/A	TR	199224
R=12420 (RR=12365. TRF=0.000 NSEG=0.184)	828	LINE	#N/A	Gypsy-47_GA-LTR,BBSINE1	#N/A	LINE	16242
R=7736 (RR=7712. TRF=0.000 NSEG=0.057)	828	DNA	#N/A	#N/A	#N/A	DNA Transposon	4189
R=1339 (RR=1328. TRF=0.000 NSEG=0.068)	826	LTR	#N/A	Gypsy8-I_SP,HERV19I,MERV1_I	#N/A	LTR	33238
R=2311 (RR=2298. TRF=0.000 NSEG=0.032)	825	unclear	#N/A	#N/A	#N/A	unclear	4453
Contig509	824	Retro	#N/A	#N/A	#N/A	Retro	7977
Contig806	824	DNA	#N/A	ERV2-5_Opr-I,L1_Opos3_orf2,hATm-30_HM	#N/A	DNA Transposon	42213
Contig293	822	LINE	#N/A	REX1-5_XT	#N/A	LINE	54900
Contig1103	821	LINE	#N/A	CACTA-2_AA	#N/A	LINE	5174
Contig1836	821	unclear	#N/A	#N/A	#N/A	unclear	10415
Contig151	820	LTR	#N/A	HERV17	#N/A	LTR	31479
Contig607	820	LTR	#N/A	DNA8-3_CQ	#N/A	LTR	32245
Contig725	819	LINE	#N/A	Nimb-2_DR,P1_Cis,BARI1	#N/A	LINE	127777
Contig981	819	Retro	#N/A	#N/A	#N/A	Retro	5729
R=2452 (RR=2439. TRF=0.000 NSEG=0.138)	819	DNA	#N/A	Rehavkus-1_TC	#N/A	DNA Transposon	8095
Contig789	818	DNA	#N/A	Ginger1-11_HM,ERV1N-1_SSc-I	#N/A	DNA Transposon	6627
Contig793	818	LTR	#N/A	Zator-N3_AAe,MERMITE18B	#N/A	LTR	4930
R=5517 (RR=5497. TRF=0.000 NSEG=0.042)	818	Retro	#N/A	TguERV4N1_I	#N/A	Retro
Contig1600	817	Retro	#N/A	#N/A	#N/A	Retro	11216
R=5638 (RR=5618. TRF=0.000 NSEG=0.084)	817	LINE	#N/A	#N/A	#N/A	LINE	9162
R=7948 (RR=7923. TRF=0.043 NSEG=0.106)	815	LTR	#N/A	DNA8-2_CQ,hAT-N22_DR	#N/A	LTR	71180
Contig927	814	LTR	#N/A	Gypsy-30_GA-I	#N/A	LTR	31309
R=3235 (RR=3222. TRF=0.000 NSEG=0.000)	814	unclear	#N/A	#N/A	#N/A	unclear	8231
Contig1010	813	LTR	#N/A	#N/A	#N/A	LTR	3423
Contig2710	813	LINE	#N/A	MARINER51_CB,GYPSY12-I_AG,Mariner-7_BM	#N/A	LINE	2439
Contig1926	810	unclear	#N/A	#N/A	#N/A	unclear	6318
Contig1957	810	Retro	#N/A	#N/A	#N/A	Retro	14599
Contig566	810	LINE	#N/A	BEL-81_AA-I,ATHAT7	#N/A	LINE	5157
Contig1227	809	LINE	#N/A	hAT-2_SM	#N/A	LINE	5856
Contig1237	808	LINE	#N/A	Rex1-1_PM	#N/A	LINE	173865
R=2019 (RR=2008. TRF=0.000 NSEG=0.056)	808	LINE	#N/A	Helitron-5_SMo	#N/A	LINE	7806
Contig1931	807	DNA	#N/A	MER57A_I,CR1-39_HM,Gypsy8-I_AP,Polinton-1_EI	#N/A	DNA Transposon	8367
Contig370	807	DNA	#N/A	FUROUSHA2,FUROUSHA1	#N/A	DNA Transposon	12814
Contig946	807	unclear	#N/A	Gypsy-100_MLP-I	#N/A	unclear	4564
R=2750 (RR=2737. TRF=0.000 NSEG=0.129)	807	unclear	#N/A	P-1_TV,Gypsy-11_BG-I,DIRS-8_DR	#N/A	unclear	11021
Contig1609	806	DNA	#N/A	Rehavkus-2_NVi,hAT-2_AP	#N/A	DNA Transposon	4521
Contig1662	806	unclear	#N/A	#N/A	#N/A	unclear	21867
R=171 (RR=165. TRF=0.000 NSEG=0.035)	803	LTR	#N/A	L1-12_XT,Gypsy-50_CQ-I	#N/A	LTR	1764
Contig2116	800	LINE	#N/A	KoshiTn1	#N/A	LINE	7814
R=1030 (RR=1019. TRF=0.000 NSEG=0.021)	800	LTR	#N/A	#N/A	#N/A	LTR	12998
Contig2131	799	unclear	#N/A	#N/A	#N/A	unclear	3191
Contig633	799	DNA	#N/A	Gypsy-23_GA-LTR,ERV1-1-I_XT,Tx1-3_BF	#N/A	DNA Transposon	6714
Contig934	799	DNA	#N/A	Helitron-1_HM,Gypsy-15_DEl-I	#N/A	DNA Transposon	205765
Contig2589	798	LINE	#N/A	#N/A	#N/A	LINE	34835
Contig1359	797	LTR	#N/A	Gypsy-3_BM-I	#N/A	LTR	5942
Contig2071	797	LTR	#N/A	#N/A	#N/A	LTR	3507
Contig2094	797	DNA	#N/A	Gypsy16-I_Dpse,L1PA15	#N/A	DNA Transposon	9507
Contig1960	796	LINE	#N/A	HAT16_CB,MER83BI	#N/A	LINE	10811
Contig2517	796	LINE	#N/A	Penelope-7_XT	#N/A	LINE	3690
Contig599	796	LINE	#N/A	ERV38_MD	#N/A	LINE	8337
R=284 (RR=276. TRF=0.000 NSEG=0.075)	795	unclear	#N/A	TSU4-I_SB	#N/A	unclear	144721
Contig2888	794	LINE	#N/A	#N/A	#N/A	LINE	23201
R=8635 (RR=8608. TRF=0.000 NSEG=0.102)	793	LTR	#N/A	#N/A	#N/A	LTR	3975
R=315 (RR=307. TRF=0.000 NSEG=0.067)	792	LTR	#N/A	MAUI	#N/A	LTR	72349
Contig2226	791	LTR	#N/A	Transib-11_HM	#N/A	LTR	2373
R=11152 (RR=11108. TRF=0.000 NSEG=0.000)	790	unclear	#N/A	#N/A	#N/A	unclear	2624
R=2368 (RR=2355. TRF=0.000 NSEG=0.052)	790	LTR	#N/A	#N/A	#N/A	LTR
Contig698	789	LINE	#N/A	#N/A	#N/A	LINE	9091
R=1265 (RR=1254. TRF=0.383 NSEG=0.150)	789	unclear	#N/A	DIRS-25_XT	#N/A	unclear	39100
R=4589 (RR=4571. TRF=0.000 NSEG=0.100)	789	DNA	#N/A	#N/A	#N/A	DNA Transposon
R=800 (RR=790. TRF=0.000 NSEG=0.052)	789	Retro	#N/A	#N/A	#N/A	Retro	13095
Contig1054	788	LINE	#N/A	REX1-7_XT	#N/A	LINE	6592
Contig1802	787	unclear	#N/A	Tc1-7_Xt	#N/A	unclear	35022
Contig1205	786	LINE	#N/A	#N/A	#N/A	LINE	5640
R=10072 (RR=10038. TRF=0.000 NSEG=0.080)	785	Retro	#N/A	EnSpm-4_DR,PIVE,Gypsy-5_SI-LTR	#N/A	Retro	7193
R=5323 (RR=5303. TRF=0.000 NSEG=0.122)	785	LINE	#N/A	Gypsy152-I_DR,NAVIHAT1,Gypsy-41_CQ-I	#N/A	LINE	51219
Contig1124	784	LINE	#N/A	CR1-18_BF,L1_AC_11	#N/A	LINE	7611
Contig1230	784	DNA	#N/A	Gypsy69-I_DR	#N/A	DNA Transposon	10018
Contig1436	784	LINE	#N/A	CR1_Ele21,SINEL_SM	#N/A	LINE	17072
Contig2801	783	LTR	#N/A	hAT-35_HM	#N/A	LTR	41646
R=4661 (RR=4643. TRF=0.000 NSEG=0.162)	783	Retro	#N/A	SAT_LM	Sat_LM	TR	225266
R=2390 (RR=2377. TRF=0.000 NSEG=0.000)	781	LTR	#N/A	#N/A	#N/A	LTR	12872
R=346 (RR=338. TRF=0.000 NSEG=0.028)	780	LINE	LINE	RTE-1_GA	#N/A	LINE	140939
R=764 (RR=754. TRF=0.000 NSEG=0.000)	780	LTR	mariner	TC1_TF	#N/A	LTR	44503
Contig1027	778	LINE	#N/A	Gypsy-9_Ano-I,HYDARGOS1_EM	#N/A	LINE	6584
Contig1352	778	unclear	#N/A	HELITRON9D_CB	#N/A	unclear	6391
Contig405	778	DNA	#N/A	S_DM	#N/A	DNA Transposon	257946
Contig440	778	unclear	#N/A	DNA-6-N2_DR,BRIDGE1_FR	#N/A	unclear	7299
R=2546 (RR=2533. TRF=0.000 NSEG=0.000)	778	Retro	#N/A	#N/A	#N/A	Retro	13435
Contig404	777	LTR	#N/A	Penelope-11_HM	#N/A	LTR	19654
Contig949	777	Retro	#N/A	HEROFr	#N/A	Retro	3115
R=11778 (RR=11729. TRF=0.000 NSEG=0.255)	777	LTR	#N/A	#N/A	#N/A	LTR	30510
Contig666	775	unclear	#N/A	CR1-8_SP,Gypsy-19_CQ-I	#N/A	unclear	3321
R=11230 (RR=11186. TRF=0.000 NSEG=0.077)	775	DNA	#N/A	Ambal-2_TP,POLINTN1_SM	#N/A	DNA Transposon	2452
R=15037 (RR=14961. TRF=0.000 NSEG=0.192)	775	LINE	#N/A	I-53_AAe,hAT-37_SM	#N/A	LINE	5116
R=2483 (RR=2470. TRF=0.046 NSEG=0.048)	775	Retro	#N/A	L1MC1	#N/A	Retro	45805
R=13424 (RR=13360. TRF=0.000 NSEG=0.085)	774	unclear	#N/A	SZ-30_I,BEL21-LTR_DR	#N/A	unclear	2721
Contig366	773	unclear	#N/A	#N/A	#N/A	unclear	1201
R=10291 (RR=10254. TRF=0.000 NSEG=0.053)	771	LINE	#N/A	SYNPE194V,CR1-20_HM	#N/A	LINE	34371
Contig1016	770	LTR	#N/A	BEL-49_CQ-I	#N/A	LTR	5162
Contig446	770	DNA	#N/A	Gypsy-11_MLP-I	#N/A	DNA Transposon	16198
Contig576	770	LTR	#N/A	ACROBAT1,LTR131_MD	#N/A	LTR	11769
Contig716	769	LINE	#N/A	Gypsy152-I_DR,NAVIHAT1,Gypsy-41_CQ-I	#N/A	LINE	2794
Contig2129	768	LINE	#N/A	Sagan-9_TMe,STOWAWAY32_OS	#N/A	LINE	5302
Contig958	768	LTR	#N/A	I_Ele4C_AAe	#N/A	LTR	9302
R=11903 (RR=11854. TRF=0.000 NSEG=0.000)	768	DNA	#N/A	#N/A	#N/A	DNA Transposon	2304
Contig1340	767	DNA	#N/A	hAT-6_HM,Copia-16_DPu-I	#N/A	DNA Transposon	3065
Contig962	765	LTR	#N/A	BEL-4_Ano-I,Crack-31_BF	#N/A	LTR	4677
Contig1308	764	LINE	#N/A	Gypsy4-NVi_I	#N/A	LINE	6310
Contig155	763	LINE	#N/A	PRIMA4_I,Gypsy59-LTR_DR	#N/A	LINE	32743
Contig904	763	LTR	#N/A	Gypsy-208_AA-I	#N/A	LTR	3057
Contig1452	762	LINE	#N/A	#N/A	#N/A	LINE	3050
Contig871	762	DNA	#N/A	TART_B1,Polinton-1_CI	#N/A	DNA Transposon	8600
R=240 (RR=232. TRF=0.000 NSEG=0.332)	762	LINE	#N/A	Polinton-1_DAn	#N/A	LINE	58685
Contig1029	761	DNA	#N/A	MER113	#N/A	DNA Transposon	6568
Contig2526	761	DNA	#N/A	hAT-47_SM	#N/A	DNA Transposon	2370
Contig2496	760	LINE	#N/A	#N/A	#N/A	LINE	2408
Contig978	760	LTR	#N/A	Gypsy-4_SMo-I,DOC5_DM,Jockey_Ele2	#N/A	LTR	11922
R=1365 (RR=1354. TRF=0.047 NSEG=0.271)	760	LINE	#N/A	L2-5_XT,L2-1_FR	#N/A	LINE	21539
Contig2324	759	LINE	#N/A	Gypsy-589_AA-I	#N/A	LINE	3016
Contig2437	759	LINE	#N/A	hATm-8_HM	#N/A	LINE	2446
R=10048 (RR=10014. TRF=0.000 NSEG=0.000)	758	Retro	#N/A	#N/A	#N/A	Retro	3033
Contig464	756	Retro	#N/A	SPMLIKE,Gypsy-42_DAn-I	#N/A	Retro	9937
Contig1168	755	unclear	#N/A	Gypsy-33_OD-I	#N/A	unclear	4717
Contig1210	755	unclear	#N/A	Helitron-7_NVi	#N/A	unclear	3021
Contig1645	753	LINE	#N/A	TCB1,TC1_TF	#N/A	LINE	18463
Contig2233	753	unclear	#N/A	SMAR3,DNA-8-3_HM	#N/A	unclear	2259
R=11653 (RR=11607. TRF=0.000 NSEG=0.000)	753	LTR	#N/A	CR1-86_HM,Kolobok-10_HM	#N/A	LTR	11322
R=5981 (RR=5961. TRF=0.000 NSEG=0.117)	753	unclear	#N/A	Gypsy19-I_Dya,PALTTTAAA2,Helitron-N1_SP	#N/A	unclear	5602
Contig1157	751	DNA	#N/A	#N/A	#N/A	DNA Transposon	7146
Contig2581	751	LINE	#N/A	L1MAB_ML,SINE3_AFC	#N/A	LINE	7539
Contig3	751	LINE	#N/A	MAUI,SINE2-1_GA,tRNAThr_CB	#N/A	LINE	420631
Contig764	751	LTR	#N/A	#N/A	#N/A	LTR	3136
Contig1312	750	LINE	#N/A	#N/A	#N/A	LINE	4597
Contig2470	750	Retro	#N/A	TY2_I	#N/A	Retro	2465
Contig7	750	DNA	#N/A	Sola2-2_HM,Gypsy-1-I_DD,hAT-N54_DR	#N/A	DNA Transposon	140462
R=1575 (RR=1564. TRF=0.000 NSEG=0.029)	749	unclear	#N/A	ERV1-I_DR	#N/A	unclear	13582
R=4322 (RR=4304. TRF=0.000 NSEG=0.067)	749	unclear	#N/A	#N/A	#N/A	unclear	6384
Contig142	748	LTR	#N/A	Gypsy-8_GA-LTR,L1-4_HM	#N/A	LTR	39283
Contig38	748	LTR	#N/A	UnaL2,Tc1-2Xt,L2-2_DRe	#N/A	LTR	168669
R=1103 (RR=1092. TRF=0.475 NSEG=0.372)	748	LINE	#N/A	TART_DV	#N/A	LINE	35605
R=312 (RR=304. TRF=0.333 NSEG=0.362)	748	LTR	#N/A	NOMAD_I,Merlin-1_Aplcal	#N/A	LTR	29123
Contig1949	747	LTR	#N/A	#N/A	#N/A	LTR	15221
Contig1572	746	Retro	#N/A	Harbinger-3_BF	#N/A	Retro	7841
R=10446 (RR=10409. TRF=0.000 NSEG=0.031)	746	Retro	#N/A	Daphne-15_SP	#N/A	Retro	14733
R=1668 (RR=1657. TRF=0.000 NSEG=0.051)	746	unclear	#N/A	Gypsy-9_PPa-I	#N/A	unclear	14737
Contig624	745	Retro	#N/A	#N/A	#N/A	Retro	8066
R=5779 (RR=5759. TRF=0.000 NSEG=0.030)	745	unclear	#N/A	Polinton-10_NVi,Chapaev-13_HM	#N/A	unclear	2233
Contig1339	744	LINE	#N/A	L2-9_DRe,MAUI	#N/A	LINE	5397
Contig1874	744	unclear	#N/A	Gypsy151-LTR_DR	#N/A	unclear	3085
Contig1534	743	unclear	#N/A	L1M2A_5	#N/A	unclear	4964
Contig2373	742	LTR	#N/A	Gypsy-195_AA-LTR,hAT-4B_AP	#N/A	LTR	16023
Contig2179	741	LTR	#N/A	#N/A	#N/A	LTR	2603
R=3993 (RR=3977. TRF=0.000 NSEG=0.078)	741	unclear	#N/A	ATCOPIA58_I	#N/A	unclear	8885
R=1758 (RR=1747. TRF=0.454 NSEG=0.053)	740	Retro	#N/A	#N/A	#N/A	Retro	6698
R=8019 (RR=7994. TRF=0.000 NSEG=0.097)	740	LINE	#N/A	#N/A	#N/A	LINE	5280
R=12330 (RR=12275. TRF=0.000 NSEG=0.058)	739	unclear	#N/A	Ginger1-8_HM	#N/A	unclear	5297
Contig578	738	LTR	#N/A	#N/A	#N/A	LTR	30915
Contig2803	737	Retro	#N/A	LTR4_Str	#N/A	Retro	2537
Contig837	737	unclear	#N/A	CER15-1-I_CE	#N/A	unclear	4265
Contig858	737	unclear	#N/A	Ginger1-3_HM,HE1_SINE,DNA-4-1_HM	#N/A	unclear	3675
Contig1095	735	LTR	#N/A	Polinton-1_XT	#N/A	LTR	9124
R=3624 (RR=3608. TRF=0.000 NSEG=0.072)	735	LINE	#N/A	GYPSIA_I	#N/A	LINE	16369
R=5801 (RR=5781. TRF=0.000 NSEG=0.056)	734	LINE	#N/A	CR1-20_HM,Sola1-7_AP	#N/A	LINE	2790
R=7033 (RR=7009. TRF=0.000 NSEG=0.074)	734	LINE	#N/A	#N/A	#N/A	LINE	3811
Contig185	733	unclear	#N/A	SYNPE194V,Gypsy-14_SI-I,Sola1-11_AP	#N/A	unclear	11361
Contig1764	732	DNA	#N/A	ERE1_EI	#N/A	DNA Transposon	20584
Contig222	732	LINE	#N/A	SINE2-1_AFC	#N/A	LINE	98734
R=955 (RR=944. TRF=0.045 NSEG=0.454)	732	LINE	#N/A	Ginger1-1_AP,Tx1-2_XT,Penelope-5_HM,hATw-3N1_BF	#N/A	LINE	282
Contig2410	731	unclear	#N/A	#N/A	#N/A	unclear	2193
R=11969 (RR=11920. TRF=0.000 NSEG=0.052)	731	unclear	#N/A	PIGGYB_SM,Helitron-2_HM	#N/A	unclear	2193
Contig2250	730	Retro	#N/A	L1ME_ORF2	#N/A	Retro	3599
Contig2369	730	LINE	#N/A	#N/A	#N/A	LINE	452547
Contig2110	729	DNA	#N/A	#N/A	#N/A	DNA Transposon	10216
Contig53	729	LTR	#N/A	TguLTRK1_I	#N/A	LTR	21948
Contig1012	727	LINE	#N/A	MER34B_I	#N/A	LINE
Contig1911	727	Retro	#N/A	PROTOP_A	#N/A	Retro	5306
R=882 (RR=871. TRF=0.063 NSEG=0.113)	727	unclear	#N/A	#N/A	#N/A	unclear	114616
Contig2743	726	unclear	#N/A	HERV19I,ERV2-4_TSy-LTR,MER4I	#N/A	unclear	2178
R=6118 (RR=6098. TRF=0.000 NSEG=0.135)	726	LTR	#N/A	#N/A	#N/A	LTR	4139
Contig2713	725	unclear	#N/A	REX3	#N/A	unclear	2858
Contig650	725	LTR	#N/A	piggyBac-N1_BM	#N/A	LTR	4282
Contig503	723	Retro	#N/A	#N/A	#N/A	Retro	6882
Contig510	723	LTR	#N/A	#N/A	#N/A	LTR	5736
R=5150 (RR=5130. TRF=0.000 NSEG=0.051)	723	LTR	#N/A	#N/A	#N/A	LTR	8838
Contig921	721	DNA	#N/A	ENSPM-6_DR,Copia-3_PR-LTR	#N/A	DNA Transposon	3728
R=4065 (RR=4049. TRF=0.000 NSEG=0.122)	721	Retro	#N/A	Gypsy19-I_Dya,PALTTTAAA2,Helitron-N1_SP	#N/A	Retro
Contig1235	720	LINE	#N/A	TAG1,TURMOIL2	#N/A	LINE	7324
Contig2176	719	LINE	#N/A	HERVIP10FH	#N/A	LINE	17878
Contig256	717	Retro	#N/A	PRS415	#N/A	Retro	9151
R=6463 (RR=6441. TRF=0.000 NSEG=0.075)	717	LINE	#N/A	#N/A	#N/A	LINE	74
Contig1216	716	LINE	#N/A	#N/A	#N/A	LINE	4987
Contig589	716	LINE	#N/A	Gypsy73-I_DR	#N/A	LINE	59
R=486 (RR=477. TRF=0.000 NSEG=0.113)	716	Retro	#N/A	Gypsy-2_PPP-I,HERV17	#N/A	Retro	26593
Contig42	715	DNA	#N/A	ROO_I	#N/A	DNA Transposon	49439
R=10640 (RR=10600. TRF=0.456 NSEG=0.000)	715	Retro	#N/A	P-1_AP,BHIKHARI-2-I_DR	#N/A	Retro	116543
Contig457	714	LINE	#N/A	MARINER36_CB,TCB2	#N/A	LINE	26191
Contig1490	713	DNA	#N/A	#N/A	#N/A	DNA Transposon	53201
Contig1889	713	DNA	#N/A	Copia8-NVi_I	#N/A	DNA Transposon	10617
Contig1185	711	LINE	#N/A	hATm-40_HM,Gypsy-623_AA-I	#N/A	LINE	3717
Contig403	711	Retro	#N/A	TguERVK10_I	#N/A	Retro	3739
R=7354 (RR=7330. TRF=0.000 NSEG=0.032)	711	LINE	#N/A	#N/A	#N/A	LINE	5702
Contig2130	710	Retro	#N/A	#N/A	#N/A	Retro	4924
Contig2132	710	unclear	#N/A	Gypsy9-SM_I,hATm-3_HM	#N/A	unclear	2841
Contig218	710	LINE	#N/A	#N/A	#N/A	LINE	35291
Contig824	710	LINE	#N/A	CR1-25_HM	#N/A	LINE	130661
Contig2378	709	LTR	#N/A	#N/A	#N/A	LTR	2127
Contig260	709	LINE	#N/A	Polinton-2_DR	#N/A	LINE	10071
Contig279	709	LINE	#N/A	MARINER36_CB,FB4_DM,TC1_DM	#N/A	LINE	19212
Contig664	709	LINE	#N/A	L1_AC_12	#N/A	LINE	8664
Contig1941	708	DNA	#N/A	Tc1-2_Xt	#N/A	DNA Transposon	8277
Contig1722	707	LTR	#N/A	Gypsy-43_GA-I	#N/A	LTR	5381
Contig2439	707	LINE	#N/A	#N/A	#N/A	LINE	2411
Contig277	707	LTR	#N/A	LTR1_Ttr	#N/A	LTR	14372
R=1099 (RR=1088. TRF=0.000 NSEG=0.212)	707	LINE	#N/A	#N/A	#N/A	LINE	208
R=6051 (RR=6031. TRF=0.072 NSEG=0.255)	707	LTR	#N/A	GLT2_SM,I-3_DAn	#N/A	LTR	80864
Contig915	706	LTR	#N/A	hATm-47_HM	#N/A	LTR	9631
Contig1990	704	DNA	#N/A	I_Ele4D_AAe	#N/A	DNA Transposon	2815
Contig2100	704	Retro	#N/A	HERVKC4,BEL-121_AA-I,MER97B	#N/A	Retro	13470
Contig2557	704	Retro	#N/A	#N/A	#N/A	Retro	2811
Contig511	704	DNA	#N/A	L1-3_BT	#N/A	DNA Transposon	3693
Contig1522	703	DNA	#N/A	Penelope-11_HM	#N/A	DNA Transposon	3723
Contig465	703	Retro	#N/A	Ambal-1_FCy	#N/A	Retro	9142
Contig766	703	Retro	#N/A	#N/A	#N/A	Retro	4705
Contig1603	702	LINE	#N/A	#N/A	#N/A	LINE	5245
Contig775	702	LTR	#N/A	EnSpm-5_HM,Gypsy-1-I_RO,MER101_I,Copia20-NVi_I	#N/A	LTR	3322
Contig120	701	LINE	#N/A	DM297_I	#N/A	LINE	40650
Contig868	701	DNA	#N/A	#N/A	#N/A	DNA Transposon	148160
Contig1226	700	LTR	#N/A	#N/A	#N/A	LTR
Contig2449	700	LINE	#N/A	NAVIHAT1,ERE1_ED	#N/A	LINE	3580
Contig903	697	unclear	#N/A	CR1-46_HM	#N/A	unclear	5633
R=6961 (RR=6937. TRF=0.000 NSEG=0.139)	697	LINE	#N/A	Gypsy-124_MLP-I	#N/A	LINE	4656
Contig2672	696	DNA	#N/A	#N/A	#N/A	DNA Transposon	588980
Contig455	695	Retro	#N/A	Polinton-2_SP	#N/A	Retro	5783
Contig60	695	unclear	#N/A	DNA-AT-2_DR	#N/A	unclear	440786
Contig1417	694	LTR	#N/A	Kolobok-1_Ppac	#N/A	LTR	4144
Contig2118	693	LTR	#N/A	#N/A	#N/A	LTR	25583
Contig2525	693	DNA	#N/A	TC1A	#N/A	DNA Transposon	11354
Contig2571	693	DNA	#N/A	Kolobok-3_Aplcal	#N/A	DNA Transposon	18304
R=5267 (RR=5247. TRF=0.000 NSEG=0.072)	693	LINE	#N/A	#N/A	#N/A	LINE	2766
Contig564	692	LINE	#N/A	BEL-2_Ano-I,Kolobok-N1_HM	#N/A	LINE	5558
R=1732 (RR=1721. TRF=0.000 NSEG=0.143)	692	LINE	#N/A	L1-23_ACar	#N/A	LINE	12051
Contig2767	691	unclear	#N/A	#N/A	#N/A	unclear	7595
R=11184 (RR=11140. TRF=0.000 NSEG=0.000)	690	Retro	#N/A	#N/A	#N/A	Retro	631247
R=4297 (RR=4279. TRF=0.000 NSEG=0.051)	690	unclear	#N/A	Gypsy-41_BG-I	#N/A	unclear	3247
R=2539 (RR=2526. TRF=0.000 NSEG=0.064)	689	Retro	#N/A	#N/A	#N/A	Retro	5250
R=4888 (RR=4869. TRF=0.000 NSEG=0.045)	689	LTR	#N/A	tRNAGlyGGC_CB,tRNA-Val-GTA	#N/A	LTR	15168
Contig1035	688	unclear	#N/A	BEL-633_AA-LTR	#N/A	unclear	31206
Contig2149	688	LTR	#N/A	L1M2C_5,Gypsy-2_PPP-I	#N/A	LTR	2064
Contig2177	688	Retro	#N/A	CACTA-1_AA	#N/A	Retro	2064
Contig610	688	unclear	#N/A	TEC2	#N/A	unclear	18693
R=2695 (RR=2682. TRF=0.000 NSEG=0.102)	688	DNA	#N/A	DNA-AT-2_DR,DNA2-9_CB,TguLTR5a	#N/A	DNA Transposon	2833
Contig1350	687	unclear	#N/A	#N/A	#N/A	unclear	2691
R=572 (RR=563. TRF=0.000 NSEG=0.191)	687	DNA	#N/A	hAT-6_XT,EnSpm-11_HM	#N/A	DNA Transposon	19930
Contig1637	686	unclear	#N/A	#N/A	#N/A	unclear	61152
Contig968	685	LTR	#N/A	ERV36_MD_I,REP-2_PSt	#N/A	LTR	3358
R=3729 (RR=3713. TRF=0.000 NSEG=0.036)	685	DNA	#N/A	TguERVK7_N2_I	#N/A	DNA Transposon	4072
Contig344	683	Retro	#N/A	#N/A	#N/A	Retro	17973
R=3019 (RR=3006. TRF=0.000 NSEG=0.067)	683	LINE	#N/A	REX1-5_XT	#N/A	LINE	9685
R=287 (RR=279. TRF=0.057 NSEG=0.232)	682	LINE	LINE	REX1-4_AFC,Transib4,L1MC1,GYPSY17-I_AG	#N/A	LINE	85136
R=2262 (RR=2249. TRF=0.000 NSEG=0.054)	681	Retro	#N/A	#N/A	#N/A	Retro	6849
Contig1240	680	LTR	#N/A	SZ-62LTR	#N/A	LTR	30096
Contig2050	680	LINE	#N/A	Chapaev3-1_NVi	#N/A	LINE	2594
Contig652	680	unclear	#N/A	ATCOPIA58_I	#N/A	unclear	2237
Contig1927	679	DNA	#N/A	BEL-158_AA-I	#N/A	DNA Transposon	6176
R=4131 (RR=4115. TRF=0.000 NSEG=0.074)	679	Retro	#N/A	#N/A	#N/A	Retro	5262
Contig2193	678	LTR	#N/A	Gypsy-5_AA-I	#N/A	LTR	12895
R=2276 (RR=2263. TRF=0.000 NSEG=0.075)	678	Retro	#N/A	#N/A	#N/A	Retro	13210
Contig1892	677	LINE	#N/A	#N/A	#N/A	LINE	2802
Contig953	677	unclear	#N/A	L1-8_DR	#N/A	unclear	14477
R=1331 (RR=1320. TRF=0.000 NSEG=0.083)	676	LINE	#N/A	#N/A	#N/A	LINE	31192
Contig1981	675	Retro	#N/A	Tc1-4Ory,L2B-1_CQ	#N/A	Retro	29796
Contig606	675	LINE	#N/A	DNA8-21_AP,MULE1_EI	#N/A	LINE	3766
R=5669 (RR=5649. TRF=0.000 NSEG=0.114)	675	LINE	#N/A	#N/A	#N/A	LINE	3390
Contig183	674	LTR	#N/A	#N/A	#N/A	LTR	17879
R=4729 (RR=4711. TRF=0.000 NSEG=0.000)	674	Retro	#N/A	MARINER3_MD	#N/A	Retro	1013
Contig918	673	Retro	#N/A	ERV2-2_STr-I,Gypsy-57_AA-I	#N/A	Retro	4320
R=10869 (RR=10828. TRF=0.000 NSEG=0.021)	673	Retro	#N/A	#N/A	#N/A	Retro	3080
R=12840 (RR=12780. TRF=0.000 NSEG=0.065)	673	LTR	#N/A	#N/A	#N/A	LTR	42380
Contig1852	672	DNA	#N/A	ERV3_DR-I	#N/A	DNA Transposon	3638
Contig332	672	DNA	#N/A	tRNAGlyGGC_CB,tRNA-Val-GTA	#N/A	DNA Transposon	1444
R=8574 (RR=8547. TRF=0.000 NSEG=0.452)	672	LTR	#N/A	HERVIP10FH	#N/A	LTR	13106
R=9320 (RR=9291. TRF=0.000 NSEG=0.000)	671	DNA	#N/A	CACTA-Q	#N/A	DNA Transposon	19698
Contig11	669	Retro	#N/A	DNA-AT-2_DR	#N/A	Retro	297564
R=14621 (RR=14547. TRF=0.000 NSEG=0.130)	669	LINE	#N/A	#N/A	#N/A	LINE	32332
R=189 (RR=183. TRF=0.000 NSEG=0.000)	669	Retro	#N/A	L2B-1_HM	#N/A	Retro	83321
R=9403 (RR=9373. TRF=0.000 NSEG=0.036)	669	Retro	#N/A	#N/A	#N/A	Retro	3308
Contig1551	668	LTR	#N/A	#N/A	#N/A	LTR	3273
R=9485 (RR=9455. TRF=0.069 NSEG=0.249)	668	DNA	#N/A	Jockey-N7_CQ	#N/A	DNA Transposon	24732
R=13638 (RR=13573. TRF=0.000 NSEG=0.037)	667	unclear	#N/A	Polinton-3_HM	#N/A	unclear	2107
R=7748 (RR=7724. TRF=0.000 NSEG=0.000)	667	LTR	#N/A	SINE2-1_AFC	#N/A	LTR	39775
Contig1513	666	LTR	#N/A	#N/A	#N/A	LTR	4559
Contig2690	666	Retro	#N/A	KibiFr1	#N/A	Retro	2055
R=8624 (RR=8597. TRF=0.053 NSEG=0.000)	666	unclear	#N/A	#N/A	#N/A	unclear	8905
Contig1511	665	LINE	#N/A	Gypsy-170_AA-I,Copia-122_AA-I	#N/A	LINE	32685
Contig2066	665	LINE	#N/A	Mariner-7_HM	#N/A	LINE	3250
Contig898	665	LTR	#N/A	PRIMA4_I	#N/A	LTR	2769
Contig1073	664	DNA	#N/A	hAT-N53_DR	#N/A	DNA Transposon	9474
Contig1091	664	LTR	#N/A	hAT-N22_DR	#N/A	LTR	15785
R=5821 (RR=5801. TRF=0.000 NSEG=0.020)	664	LINE	#N/A	L2-1_NVi	#N/A	LINE	2916
Contig1167	663	LINE	#N/A	#N/A	#N/A	LINE	3522
R=1277 (RR=1266. TRF=0.000 NSEG=0.069)	663	LINE	LINE	REX1-1_GA	#N/A	LINE	21463
R=6153 (RR=6133. TRF=0.000 NSEG=0.000)	663	Retro	#N/A	#N/A	#N/A	Retro	3867
R=11698 (RR=11651. TRF=0.000 NSEG=0.183)	661	LINE	#N/A	MINIME_DN	#N/A	LINE	1983
Contig1326	660	LTR	#N/A	ERV32_MD_I	#N/A	LTR	2724
Contig2625	660	Retro	#N/A	#N/A	#N/A	Retro	2223
Contig1850	659	LTR	#N/A	Gypsy-75_MLP-I,Gypsy-14_XT-I	#N/A	LTR	5035
Contig2095	659	LINE	#N/A	#N/A	#N/A	LINE	9892
Contig676	659	Retro	#N/A	#N/A	#N/A	Retro	125487
Contig1942	658	unclear	#N/A	#N/A	#N/A	unclear	25662
R=620 (RR=611. TRF=0.000 NSEG=0.090)	658	DNA	#N/A	ONSATB	#N/A	DNA Transposon	110532
Contig1127	657	LINE	#N/A	Gypsy-31-I_DR	#N/A	LINE	2614
Contig635	657	unclear	#N/A	MuDR1_TP	#N/A	unclear	7621
R=8570 (RR=8543. TRF=0.000 NSEG=0.236)	657	LINE	#N/A	MER106B,Kolobok-3_Aplcal,hAT-28_HM	#N/A	LINE	5051
Contig1829	656	LTR	#N/A	#N/A	#N/A	LTR	10385
Contig1905	656	LTR	#N/A	Penelope-5_XT	#N/A	LTR	66304
Contig2181	656	LTR	#N/A	IAPEY3_I	#N/A	LTR	1968
Contig613	656	LINE	#N/A	CR1-G,Gypsy61-I_DR	#N/A	LINE	10117
Contig139	653	DNA	#N/A	Gypsy-597_AA-I,CR1-3_HM,MuDr-1_TV	#N/A	DNA Transposon	12875
Contig462	653	LINE	#N/A	#N/A	#N/A	LINE	46689
Contig518	653	LINE	#N/A	#N/A	#N/A	LINE	7920
R=12361 (RR=12306. TRF=0.000 NSEG=0.118)	653	Retro	#N/A	HELITRONY3	#N/A	Retro	2848
Contig1024	652	DNA	#N/A	#N/A	#N/A	DNA Transposon	3424
Contig1639	651	unclear	#N/A	Jockey-N7_CQ	#N/A	unclear	826
Contig1321	650	unclear	#N/A	ROn-1_ON	#N/A	unclear	16238
Contig677	650	LINE	#N/A	THRIA	#N/A	LINE	6705
Contig1961	649	LINE	#N/A	Penelope-6_XT	#N/A	LINE	11860
R=13157 (RR=13095. TRF=0.000 NSEG=0.245)	649	LTR	#N/A	Daphne-24_HMa	#N/A	LTR	3942
Contig1318	647	unclear	#N/A	#N/A	#N/A	unclear	11585
Contig407	647	unclear	#N/A	DIRS-10_DR	#N/A	unclear	9841
Contig1209	646	LTR	#N/A	#N/A	#N/A	LTR	318066
R=10352 (RR=10315. TRF=0.000 NSEG=0.090)	646	unclear	#N/A	#N/A	#N/A	unclear	2853
Contig1104	645	LTR	#N/A	LTR192_MD,piggyBac-N2A_XT,Polinton-1_SPU	#N/A	LTR	5527
Contig1113	645	DNA	#N/A	#N/A	#N/A	DNA Transposon	2912
Contig2454	644	DNA	#N/A	EnSpm-4_DR	#N/A	DNA Transposon	5937
Contig501	644	DNA	#N/A	Copia20-NVi_I,Gypsy78-I_DR	#N/A	DNA Transposon	3434
Contig719	644	LINE	#N/A	REX1-1_XT	#N/A	LINE	124154
R=1400 (RR=1389. TRF=0.000 NSEG=0.058)	643	unclear	#N/A	#N/A	#N/A	unclear
Contig1962	642	unclear	#N/A	P2_AG,Sola3-1_BF	#N/A	unclear	4736
R=9983 (RR=9950. TRF=0.000 NSEG=0.133)	640	LINE	#N/A	MER6,SINE_TE	#N/A	LINE	79120
Contig1215	639	LINE	#N/A	ERV2-1_OG-I,ISL2EU-6_HM	#N/A	LINE	3358
Contig2530	638	Retro	#N/A	Neptune_Hyd	#N/A	Retro	1975
Contig2675	638	LTR	#N/A	CR1-82_HM	#N/A	LTR	2001
Contig345	638	LTR	#N/A	BEL1-I_DR,MERLIN2_CB,PRIMA4_I	#N/A	LTR	52175
R=10136 (RR=10101. TRF=0.000 NSEG=0.136)	638	Retro	#N/A	HARBINGER,ERV22_MD_I,Gypsy-52_AA-I	#N/A	Retro	5068
Contig2430	637	Retro	#N/A	#N/A	#N/A	Retro	2248
Contig1628	636	DNA	#N/A	#N/A	#N/A	DNA Transposon	6844
R=9734 (RR=9702. TRF=0.475 NSEG=0.094)	636	unclear	#N/A	ERV3-1N1-LTR_XT	#N/A	unclear	4053
Contig2282	635	Retro	#N/A	Gypsy-251_AA-I	#N/A	Retro	5871
Contig2610	635	LTR	#N/A	#N/A	#N/A	LTR	1905
Contig976	635	unclear	#N/A	Sola1-1_AC	#N/A	unclear	2651
R=13229 (RR=13166. TRF=0.000 NSEG=0.036)	635	LINE	#N/A	#N/A	#N/A	LINE	6339
R=2301 (RR=2288. TRF=0.000 NSEG=0.044)	634	Retro	#N/A	#N/A	#N/A	Retro	2351
Contig2842	633	LINE	#N/A	#N/A	#N/A	LINE
Contig416	633	Retro	#N/A	#N/A	#N/A	Retro	81
Contig131	632	Retro	#N/A	#N/A	#N/A	Retro	100330
Contig2739	632	DNA	#N/A	GYPSY3-I_CB,Dong	#N/A	DNA Transposon	38779
R=13618 (RR=13553. TRF=0.000 NSEG=0.065)	632	Retro	#N/A	CR1-E_Pass	#N/A	Retro	3571
Contig2836	631	DNA	#N/A	#N/A	#N/A	DNA Transposon	19823
Contig41	631	Retro	#N/A	ATENSPM9	#N/A	Retro	67995
Contig57	631	DNA	#N/A	#N/A	#N/A	DNA Transposon	21062
Contig595	631	DNA	#N/A	EnSpmN1_DR,DNA-2-12_DR	#N/A	DNA Transposon	11141
Contig630	629	unclear	#N/A	#N/A	#N/A	unclear	9499
Contig1296	628	LINE	#N/A	#N/A	#N/A	LINE	3877
Contig1297	628	LINE	#N/A	HMSBEAGLE_I	#N/A	LINE	2567
Contig502	627	LTR	#N/A	Tigger3b	#N/A	LTR	21978
R=8762 (RR=8734. TRF=0.000 NSEG=0.027)	627	unclear	#N/A	MER6,SINE_TE	#N/A	unclear	332396
Contig1189	626	LINE	#N/A	DIRS_Nvi	#N/A	LINE	3388
Contig2564	626	LTR	#N/A	BEL-66_AA-LTR	#N/A	LTR	1878
R=8554 (RR=8527. TRF=0.000 NSEG=0.000)	626	LINE	#N/A	hATA_ME	#N/A	LINE	5207
Contig323	625	unclear	#N/A	TART_B1	#N/A	unclear	12785
R=2275 (RR=2262. TRF=0.000 NSEG=0.086)	625	DNA	mariner	TC1_RT	#N/A	DNA Transposon	61924
Contig1489	624	LINE	#N/A	#N/A	#N/A	LINE	2877
Contig1828	624	LTR	#N/A	MER6	#N/A	LTR	39923
Contig2492	624	DNA	#N/A	P-3_Hrobusta	#N/A	DNA Transposon	1944
Contig1101	623	Retro	#N/A	MER6,SINE_TE	#N/A	Retro
Contig717	623	DNA	#N/A	hATm-29_HM,TSE1_I,Hogri1	#N/A	DNA Transposon	4859
Contig936	623	DNA	#N/A	Gypsy-148_AA-I,Polinton-1_HM	#N/A	DNA Transposon	14536
R=8995 (RR=8967. TRF=0.000 NSEG=0.079)	623	LTR	#N/A	CR1_Ele32,L1-2B_LA-5end	#N/A	LTR	4082
Contig1954	621	Retro	#N/A	#N/A	#N/A	Retro	3044
Contig2280	621	unclear	#N/A	#N/A	#N/A	unclear	1863
Contig364	620	LTR	#N/A	BEL-1_GA-LTR,MUDR4_CB	#N/A	LTR	10641
R=15112 (RR=15035. TRF=0.000 NSEG=0.042)	620	LTR	#N/A	#N/A	#N/A	LTR	1898
R=2769 (RR=2756. TRF=0.000 NSEG=0.027)	620	LTR	#N/A	BEL2-I_SP	#N/A	LTR	6545
Contig1135	619	LINE	#N/A	#N/A	#N/A	LINE	3575
Contig2111	619	unclear	#N/A	hAT-32_HM	#N/A	unclear	3649
Contig2165	619	LINE	#N/A	#N/A	#N/A	LINE	1857
Contig515	619	LINE	#N/A	Talua	#N/A	LINE	15104
R=2498 (RR=2485. TRF=0.000 NSEG=0.052)	619	LTR	#N/A	#N/A	#N/A	LTR	34581
R=462 (RR=453. TRF=0.000 NSEG=0.103)	619	LINE	#N/A	DNA8-13_CQ,Chapaev-10_HM,DINOLT1	#N/A	LINE	52481
Contig2321	618	LINE	#N/A	#N/A	#N/A	LINE	3868
Contig2328	618	LINE	#N/A	#N/A	#N/A	LINE	2359
Contig2796	618	LTR	#N/A	#N/A	#N/A	LTR	5239
R=1422 (RR=1411. TRF=0.000 NSEG=0.000)	618	LINE	#N/A	L1SU_SP	#N/A	LINE	30737
Contig2030	617	LINE	#N/A	Gypsy-9_GA-I	#N/A	LINE	7498
Contig31	617	LINE	#N/A	RTE-1_GA	#N/A	LINE	491836
R=14505 (RR=14432. TRF=0.000 NSEG=0.149)	617	unclear	#N/A	HETA,SMAR5,Gypsy-44_CQ-I	#N/A	unclear	1903
Contig1108	616	LINE	#N/A	Gypsy-4_TCa-I	#N/A	LINE	2784
R=4634 (RR=4616. TRF=0.000 NSEG=0.000)	616	LTR	#N/A	ERV1-N8-I_DR	#N/A	LTR	937
Contig402	615	LINE	#N/A	ROn-1_ON	#N/A	LINE	7279
R=11089 (RR=11045. TRF=0.000 NSEG=0.076)	615	LINE	#N/A	#N/A	#N/A	LINE	3169
R=2903 (RR=2890. TRF=0.000 NSEG=0.085)	615	LINE	#N/A	#N/A	#N/A	LINE	15893
Contig1888	614	LINE	#N/A	#N/A	#N/A	LINE	9458
Contig2178	614	LINE	#N/A	CR1-35_HM,ENSPM-6_DR	#N/A	LINE	135172
Contig386	614	LINE	#N/A	REX1-1_XT	#N/A	LINE	59109
Contig1996	612	LINE	#N/A	NOMAD_I	#N/A	LINE	2450
Contig95	612	Retro	#N/A	#N/A	#N/A	Retro	27450
R=2792 (RR=2779. TRF=0.000 NSEG=0.105)	612	LINE	#N/A	Helitron-3_NVi,Gypsy-20-I_DR	#N/A	LINE	4039
R=6225 (RR=6204. TRF=0.000 NSEG=0.000)	612	LINE	gypsy	MER84I,ERV1-3-I_DR	#N/A	LINE	5275
Contig2665	610	LINE	#N/A	Kolobok-N2_XT	#N/A	LINE	4590
Contig1762	608	LTR	#N/A	TC1_FR4,Gypsy100-LTR_DR,Gypsy-7_DWil-I	#N/A	LTR	3033
Contig1879	608	LINE	#N/A	Gypsy37-I_DR,Gypsy-26_AA-I	#N/A	LINE	4656
Contig1938	608	LINE	#N/A	CER1	#N/A	LINE	2425
Contig2241	608	LINE	#N/A	Ginger1-8_HM	#N/A	LINE	2025
Contig2326	608	LINE	#N/A	CR1-42_HM	#N/A	LINE	1824
R=1705 (RR=1694. TRF=0.000 NSEG=0.000)	608	LINE	gypsy	Gypsy-5_GA-I	#N/A	LINE	9083
Contig1088	607	LINE	#N/A	FUGUREP2	#N/A	LINE	27859
Contig1145	607	LINE	#N/A	#N/A	#N/A	LINE	3310
Contig116	607	LINE	#N/A	TC1_RP,Kolobok-N4_DR	#N/A	LINE	37517
Contig2636	607	Retro	#N/A	L1-5A2_EC	#N/A	Retro	1821
Contig2657	607	LINE	#N/A	BRIDGE1_FR,hAT-6_XT	#N/A	LINE	2318
Contig498	607	LTR	#N/A	#N/A	#N/A	LTR	20179
Contig638	607	LINE	#N/A	Rex1-1_PM	#N/A	LINE	20600
Contig697	606	LTR	#N/A	CR1_Ele32,L1-2B_LA-5end	#N/A	LTR
Contig707	606	LTR	#N/A	#N/A	#N/A	LTR	8654
R=13836 (RR=13770. TRF=0.000 NSEG=0.035)	606	LTR	#N/A	#N/A	#N/A	LTR	10091
Contig1807	605	LINE	#N/A	hAT-10_HM	#N/A	LINE	2422
Contig2671	605	unclear	#N/A	Neptune_Hyd	#N/A	unclear	6332
Contig876	604	LINE	#N/A	L2-2_CM	#N/A	LINE	11215
R=11429 (RR=11383. TRF=0.000 NSEG=0.151)	604	LINE	#N/A	L2-3_XT	#N/A	LINE	3094
R=14079 (RR=14011. TRF=0.048 NSEG=0.159)	604	LINE	#N/A	#N/A	#N/A	LINE	1812
Contig303	603	LINE	#N/A	FB4_DM	#N/A	LINE	10768
Contig266	602	LINE	#N/A	#N/A	#N/A	LINE	6913
R=11255 (RR=11211. TRF=0.000 NSEG=0.035)	602	DNA	#N/A	#N/A	#N/A	DNA Transposon	24612
R=915 (RR=904. TRF=0.000 NSEG=0.032)	602	LINE	#N/A	#N/A	#N/A	LINE	4411
Contig1422	601	LTR	#N/A	L1_AC_1	#N/A	LTR	11207
Contig2884	601	LINE	#N/A	HERVIP10FH,MER4I	#N/A	LINE	3722
Contig1097	600	LINE	#N/A	#N/A	#N/A	LINE	9204
Contig1211	600	LINE	#N/A	#N/A	#N/A	LINE	7734
Contig2396	599	LINE	#N/A	PlatLTR35a_I	#N/A	LINE	1797
Contig109	597	Retro	#N/A	#N/A	#N/A	Retro	28350
Contig2871	597	LINE	#N/A	Polinton-3_SP	#N/A	LINE	1791
R=357 (RR=349. TRF=0.000 NSEG=0.040)	597	DNA	#N/A	EnSpm-13_HM	#N/A	DNA Transposon	43635
R=5464 (RR=5444. TRF=0.000 NSEG=0.035)	597	LINE	#N/A	hATm-38_HM	#N/A	LINE	5527
R=8080 (RR=8055. TRF=0.467 NSEG=0.121)	597	Retro	#N/A	Kolobok-1_FraCyl	#N/A	Retro	7405
Contig351	596	LTR	#N/A	EnSpm-16_HM,CR1-48_HM	#N/A	LTR	6841
Contig1688	595	Retro	#N/A	RTE-1_AFC	#N/A	Retro	3441
Contig431	595	Retro	#N/A	Helitron-1_DVir	#N/A	Retro	21787
Contig988	595	LINE	#N/A	CR1-30_HM	#N/A	LINE	2379
R=2854 (RR=2841. TRF=0.000 NSEG=0.035)	595	LTR	#N/A	ONSATB	#N/A	LTR	15792
Contig2374	593	unclear	#N/A	Helitron-1_DR,BEL-2_BMa-I	#N/A	unclear	2016
Contig1388	592	LINE	#N/A	#N/A	#N/A	LINE	5233
Contig2824	592	Retro	#N/A	#N/A	#N/A	Retro	876
Contig655	592	LINE	#N/A	GYPSY2_I	#N/A	LINE	60894
R=13380 (RR=13317. TRF=0.000 NSEG=0.081)	592	LTR	#N/A	#N/A	#N/A	LTR	6941
Contig1345	591	LINE	#N/A	#N/A	#N/A	LINE	8289
Contig1531	591	LINE	#N/A	#N/A	#N/A	LINE	2576
Contig2138	591	Retro	#N/A	#N/A	#N/A	Retro	1773
Contig320	590	LINE	#N/A	DM176	#N/A	LINE	25523
R=2825 (RR=2812. TRF=0.000 NSEG=0.098)	590	LINE	#N/A	RTE-19_BF	#N/A	LINE	16192
R=343 (RR=335. TRF=0.000 NSEG=0.137)	590	LINE	#N/A	Gypsy-19_DEl-I	#N/A	LINE	12589
Contig2093	589	LINE	#N/A	#N/A	#N/A	LINE	9411
Contig263	589	LINE	#N/A	#N/A	#N/A	LINE	28667
Contig678	589	LINE	#N/A	#N/A	#N/A	LINE	5265
R=11885 (RR=11836. TRF=0.000 NSEG=0.209)	589	LINE	#N/A	AgaP12	#N/A	LINE	1831
R=6043 (RR=6023. TRF=0.000 NSEG=0.000)	589	LTR	#N/A	CACTA-Q	#N/A	LTR	209
R=12342 (RR=12287. TRF=0.000 NSEG=0.032)	588	DNA	#N/A	RBTVL	#N/A	DNA Transposon	3019
R=58 (RR=57. TRF=0.105 NSEG=0.262)	588	LINE	#N/A	CACTA-1_Dpulex	#N/A	LINE	175712
Contig2259	587	LTR	#N/A	Gypsy150-I_DR	#N/A	LTR	1881
Contig297	587	LINE	#N/A	#N/A	#N/A	LINE	9148
R=2254 (RR=2241. TRF=0.000 NSEG=0.266)	587	LINE	LINE	L1-4_PVa	#N/A	LINE	8546
R=1158 (RR=1147. TRF=0.000 NSEG=0.039)	586	LINE	LINE	REX1-1_GA	#N/A	LINE	3673
Contig1058	585	LINE	#N/A	I-3_DR	#N/A	LINE	4193
Contig1799	585	LINE	#N/A	Zator-1_AA	#N/A	LINE	2455
Contig746	585	LINE	#N/A	#N/A	#N/A	LINE	2339
R=13475 (RR=13411. TRF=0.000 NSEG=0.103)	585	Retro	#N/A	#N/A	#N/A	Retro	3370
R=4021 (RR=4005. TRF=0.000 NSEG=0.089)	584	LTR	#N/A	Polinton-2_DR	#N/A	LTR	5322
Contig215	583	LTR	#N/A	#N/A	#N/A	LTR	5431
Contig1221	582	unclear	#N/A	Ambal-2_FCy	#N/A	unclear	2501
R=1366 (RR=1355. TRF=0.000 NSEG=0.036)	582	LINE	#N/A	hATm-38_HM	#N/A	LINE
R=697 (RR=687. TRF=0.000 NSEG=0.000)	582	LINE	LINE	RTE-1_GA	#N/A	LINE	75628
Contig2199	581	Retro	#N/A	CR1-15_BF	#N/A	Retro	1743
Contig2262	580	DNA	#N/A	#N/A	#N/A	DNA Transposon	70063
R=3948 (RR=3932. TRF=0.000 NSEG=0.053)	580	LINE	#N/A	#N/A	#N/A	LINE	6237
Contig1918	579	LTR	#N/A	RLTR12B2	#N/A	LTR	243434
Contig694	579	LTR	#N/A	Gypsy-11_GA-I	#N/A	LTR	3376
R=12236 (RR=12183. TRF=0.000 NSEG=0.000)	579	unclear	#N/A	#N/A	#N/A	unclear	4685
R=289 (RR=281. TRF=0.117 NSEG=0.244)	579	LTR	#N/A	REP-1_ED	#N/A	LTR	112225
Contig2171	578	LINE	#N/A	INVADER5_I,L1_AC_15	#N/A	LINE	1734
R=649 (RR=640. TRF=0.000 NSEG=0.000)	578	LTR	#N/A	#N/A	#N/A	LTR	16162
Contig1394	577	LINE	#N/A	#N/A	#N/A	LINE	4360
Contig2567	577	LINE	#N/A	DNA8-46_AP	#N/A	LINE	1731
Contig1011	576	LINE	#N/A	hAT-69_HM,Ambal-3N1_FCy	#N/A	LINE	85
Contig1081	576	LINE	#N/A	#N/A	#N/A	LINE	5742
Contig2891	576	LINE	#N/A	RTE-1_AFC,RTE-1_GA	#N/A	LINE	3861
Contig543	576	LTR	#N/A	#N/A	#N/A	LTR	9163
Contig631	576	LINE	#N/A	#N/A	#N/A	LINE	6336
R=10875 (RR=10834. TRF=0.078 NSEG=0.181)	576	Retro	#N/A	MARINER_OL	#N/A	Retro	43250
Contig2342	575	LINE	#N/A	BEL-27_CQ-I	#N/A	LINE	1807
Contig1461	574	LINE	#N/A	#N/A	#N/A	LINE	2416
Contig890	574	LINE	#N/A	MuDR-5_OS,Neptune_Hyd	#N/A	LINE	4440
R=6057 (RR=6037. TRF=0.000 NSEG=0.051)	574	LTR	#N/A	Kolobok-21_HMa	#N/A	LTR	2290
Contig1396	573	LINE	#N/A	#N/A	#N/A	LINE	5888
Contig2628	573	unclear	#N/A	#N/A	#N/A	unclear	1719
Contig519	573	LINE	#N/A	L1-1D_Cpo	#N/A	LINE	31778
R=11737 (RR=11689. TRF=0.000 NSEG=0.040)	573	LINE	#N/A	BEL-84_AA-LTR,PlatLTR35a_I	#N/A	LINE	1719
R=407 (RR=399. TRF=0.000 NSEG=0.168)	573	LINE	mariner	TC1_DM,BBSINE1,HERVKC4	#N/A	LINE	109741
Contig1184	572	LTR	#N/A	ERV1-1_OPr-LTR	#N/A	LTR	71061
Contig1256	572	LINE	#N/A	#N/A	#N/A	LINE	3556
R=1523 (RR=1512. TRF=0.000 NSEG=0.046)	571	LINE	#N/A	GYPSY11_I,DNA-2-3_HM	#N/A	LINE	36010
Contig1454	570	LINE	#N/A	REX1-5_XT	#N/A	LINE	28763
Contig2201	570	LINE	#N/A	#N/A	#N/A	LINE	2521
R=7924 (RR=7899. TRF=0.000 NSEG=0.161)	570	LTR	#N/A	#N/A	#N/A	LTR	2780
Contig2523	569	LINE	#N/A	#N/A	#N/A	LINE	30016
Contig667	569	LINE	#N/A	L2-1_FR	#N/A	LINE	10707
Contig1806	568	unclear	#N/A	#N/A	#N/A	unclear	306175
R=2071 (RR=2060. TRF=0.100 NSEG=0.129)	568	LTR	#N/A	#N/A	#N/A	LTR	21899
Contig1146	567	LINE	#N/A	L1-4_Cho,LTR14_Ttr	#N/A	LINE	2856
Contig1155	567	LINE	#N/A	MER6,SINE_TE	#N/A	LINE	109770
Contig1717	567	LINE	#N/A	MARINER_OL	#N/A	LINE	35283
Contig1970	567	LINE	#N/A	#N/A	#N/A	LINE	3321
Contig1241	566	LINE	#N/A	#N/A	#N/A	LINE	4845
Contig2600	565	LINE	#N/A	#N/A	#N/A	LINE	19183
Contig422	565	LINE	#N/A	BEL-3_AA-I	#N/A	LINE	7645
R=13335 (RR=13272. TRF=0.000 NSEG=0.156)	565	LINE	#N/A	P-33_HM,TDD-5	#N/A	LINE	2405
Contig1866	564	Retro	#N/A	Polinton-3_SP	#N/A	Retro	3404
R=5694 (RR=5674. TRF=0.000 NSEG=0.207)	564	LINE	#N/A	Mariner-32_HM	#N/A	LINE	2054
Contig1801	563	LINE	#N/A	L2_AC_12	#N/A	LINE	4480
Contig925	563	LINE	#N/A	#N/A	#N/A	LINE	3231
R=1346 (RR=1335. TRF=0.044 NSEG=0.098)	563	Retro	#N/A	#N/A	#N/A	Retro
R=216 (RR=209. TRF=0.000 NSEG=0.190)	563	DNA	#N/A	ONSATB	Asian_seabass_ONSAT_SB	TR	23909
R=8515 (RR=8488. TRF=0.000 NSEG=0.036)	563	LINE	#N/A	#N/A	#N/A	LINE	5713
Contig1515	561	LINE	#N/A	DIRS-3_XT	#N/A	LINE	4369
Contig2183	561	LINE	#N/A	#N/A	#N/A	LINE	1683
Contig2296	560	LINE	#N/A	#N/A	#N/A	LINE	7803
Contig644	560	LINE	#N/A	DNA2-1_SM,Gypsy-37_CQ-I	#N/A	LINE	4974
Contig2255	559	LTR	#N/A	#N/A	#N/A	LTR	1977
R=10929 (RR=10887. TRF=0.000 NSEG=0.047)	559	LINE	#N/A	#N/A	#N/A	LINE	1677
R=8533 (RR=8506. TRF=0.000 NSEG=0.000)	559	Retro	#N/A	#N/A	#N/A	Retro	4281
Contig2385	558	LTR	#N/A	BEL-31_AA-I,L1-5_MD	#N/A	LTR	19738
Contig856	558	LINE	#N/A	Gypsy-85_MLP-I	#N/A	LINE	4680
Contig2308	557	LINE	#N/A	Tc1-17a_Xen	#N/A	LINE	106596
Contig2475	557	LINE	#N/A	L1-4_DR,piggyBac-16_SM	#N/A	LINE	1671
Contig2482	557	LINE	#N/A	#N/A	#N/A	LINE	13539
R=10455 (RR=10418. TRF=0.000 NSEG=0.163)	557	unclear	#N/A	Mariner-32_HM,Helitron-1_SMo	#N/A	unclear	2211
R=1875 (RR=1864. TRF=0.000 NSEG=0.043)	557	LTR	#N/A	#N/A	#N/A	LTR	7245
Contig1129	556	Retro	#N/A	Copia-11_SMo-I,L2_AC_2	#N/A	Retro	21569
Contig2128	556	LINE	#N/A	LTR10D_OC	#N/A	LINE	2878
Contig2859	556	Retro	#N/A	Tx1-5_FR,DNA-2-1_HM	#N/A	Retro	1668
R=242 (RR=234. TRF=0.000 NSEG=0.097)	556	LTR	#N/A	#N/A	#N/A	LTR	60973
R=5498 (RR=5478. TRF=0.000 NSEG=0.156)	556	DNA	#N/A	MirageN1b_CB,MARINER66_CB,Ginger1-11_HM	#N/A	DNA Transposon	4045
Contig1615	555	LINE	#N/A	#N/A	#N/A	LINE	13533
R=185 (RR=179. TRF=0.000 NSEG=0.175)	555	LINE	#N/A	#N/A	#N/A	LINE	56479
R=2980 (RR=2967. TRF=0.000 NSEG=0.056)	555	LINE	#N/A	Gypsy-90_MLP-LTR	#N/A	LINE	7521
R=3202 (RR=3189. TRF=0.209 NSEG=0.263)	555	Retro	#N/A	TRE3C,hATm-53_HM,FUGUREP2	#N/A	Retro	4318
R=12103 (RR=12050. TRF=0.000 NSEG=0.065)	554	DNA	#N/A	Daphne-8_HMa	#N/A	DNA Transposon	1723
Contig1859	553	LINE	#N/A	Gypsy-25_DEl-I	#N/A	LINE	2123
Contig1882	553	LINE	#N/A	HERVK9I	#N/A	LINE	3322
Contig2393	553	unclear	#N/A	#N/A	#N/A	unclear	4462
Contig2424	553	Retro	#N/A	#N/A	#N/A	Retro	2165
R=12162 (RR=12109. TRF=0.000 NSEG=0.027)	553	LINE	#N/A	#N/A	#N/A	LINE	4652
Contig1206	552	LTR	#N/A	#N/A	#N/A	LTR	2759
Contig2283	552	LTR	#N/A	Copia-2_DEl-I,Kolobok-N7_XT	#N/A	LTR	1656
Contig2799	552	LTR	#N/A	DNAUN1_OS,ERVB2_2-I_RN,CR1-85_HM	#N/A	LTR	10721
Contig1446	551	LINE	#N/A	L1_Opos3_orf2	#N/A	LINE	4227
Contig1459	551	LINE	#N/A	#N/A	#N/A	LINE	8419
Contig1955	551	LINE	#N/A	REX1-3_XT	#N/A	LINE	8349
R=6724 (RR=6701. TRF=0.000 NSEG=0.100)	550	LINE	#N/A	LTR22B1	#N/A	LINE	3739
Contig2147	549	Retro	#N/A	EnSpm-8_HM,Polinton-1_CB	#N/A	Retro	1647
Contig1122	548	LINE	#N/A	HAL1-1C_Tbel	#N/A	LINE	4200
Contig144	548	LINE	#N/A	#N/A	#N/A	LINE	7061
Contig2153	548	LTR	#N/A	Jockey_Ele2	#N/A	LTR	1886
Contig2317	548	LINE	#N/A	CR1-7_NVi,REP-1_ED	#N/A	LINE	4896
R=13827 (RR=13761. TRF=0.000 NSEG=0.038)	548	DNA	#N/A	Rehavkus-1_NVi	#N/A	DNA Transposon	8520
Contig1464	547	Retro	#N/A	CRATA,DNA8-18_AP	#N/A	Retro	2385
Contig5	547	nonLTR	#N/A	Tc1-16_Xt	#N/A	nonLTR	735537
Contig526	547	LINE	#N/A	#N/A	#N/A	LINE	9855
Contig363	546	LINE	#N/A	#N/A	#N/A	LINE	9176
Contig1730	545	LINE	#N/A	#N/A	#N/A	LINE	3218
Contig900	545	LINE	#N/A	MDG1_I	#N/A	LINE	2804
Contig2401	544	LINE	#N/A	#N/A	#N/A	LINE	1632
R=11445 (RR=11399. TRF=0.000 NSEG=0.167)	544	LTR	#N/A	#N/A	#N/A	LTR	2107
R=290 (RR=282. TRF=0.000 NSEG=0.064)	544	LINE	#N/A	TC2_FR3A,TC2_FR5	#N/A	LINE	49657
Contig1282	543	LINE	#N/A	DNA8-43_AP	#N/A	LINE	8334
Contig1314	543	Retro	#N/A	Zator-1_Lgigantea	#N/A	Retro	3843
Contig1520	543	LINE	#N/A	#N/A	#N/A	LINE	2380
R=12118 (RR=12065. TRF=0.000 NSEG=0.046)	543	LTR	#N/A	#N/A	#N/A	LTR	1863
R=5019 (RR=5000. TRF=0.000 NSEG=0.035)	543	LINE	#N/A	tRNA-Met-i,piggyBac-2_XT	#N/A	LINE	4809
R=1583 (RR=1572. TRF=0.000 NSEG=0.137)	542	LINE	#N/A	#N/A	#N/A	LINE	5930
Contig1313	541	LINE	#N/A	#N/A	#N/A	LINE	6272
Contig2614	541	LINE	#N/A	ERVB2_2-I_RN	#N/A	LINE	1794
Contig2798	541	Retro	#N/A	L1-36_XT,Zator-N1B_CQ	#N/A	Retro	2289
Contig2245	539	LTR	#N/A	#N/A	#N/A	LTR	4638
Contig2673	539	LINE	#N/A	GYPSY7_I	#N/A	LINE	1617
R=8347 (RR=8320. TRF=0.000 NSEG=0.078)	539	LINE	gypsy	Gypsy-47_GA-I,OSVALDO_I,Gypsy-38_GA-I	#N/A	LINE	3664
Contig1300	538	LINE	#N/A	#N/A	#N/A	LINE	2232
Contig1315	538	LINE	#N/A	Sola1-1_PPa	#N/A	LINE	6290
Contig326	538	unclear	#N/A	DNA8-11_CQ	#N/A	unclear	3855
Contig670	538	LTR	#N/A	Transib-8_DAn	#N/A	LTR	3737
Contig770	538	Retro	#N/A	#N/A	#N/A	Retro
Contig952	538	LINE	#N/A	Rex6,DONG_FR2	#N/A	LINE	9054
R=1047 (RR=1036. TRF=0.000 NSEG=0.071)	538	LINE	#N/A	I_Ele4D_AAe	#N/A	LINE	11143
R=14957 (RR=14881. TRF=0.000 NSEG=0.115)	538	DNA	#N/A	HAL1-1E_Tbel,LIN7_SM	#N/A	DNA Transposon	1614
R=11435 (RR=11389. TRF=0.000 NSEG=0.067)	537	LINE	#N/A	#N/A	#N/A	LINE	1651
Contig137	536	LTR	#N/A	MARINER_OL	#N/A	LTR	45291
Contig1703	536	LTR	#N/A	#N/A	#N/A	LTR	2138
Contig2626	536	LINE	#N/A	LOR1I,CR1-26_HM	#N/A	LINE	1732
Contig2736	536	LTR	#N/A	Gypsy-9_RP-LTR	#N/A	LTR	1651
R=6739 (RR=6716. TRF=0.000 NSEG=0.035)	536	LINE	#N/A	#N/A	#N/A	LINE	5399
Contig1093	535	LINE	#N/A	CR1-27_DR,L1_AC_18,Daphne-65_HMa	#N/A	LINE	10106
Contig1951	535	Retro	#N/A	#N/A	#N/A	Retro	5596
Contig2169	535	LINE	#N/A	hAT-14_SM	#N/A	LINE	1605
R=1869 (RR=1858. TRF=0.000 NSEG=0.000)	535	Retro	#N/A	SINE2-1_AFC	#N/A	Retro	27095
R=8227 (RR=8201. TRF=0.000 NSEG=0.215)	535	LINE	#N/A	#N/A	#N/A	LINE	278
Contig1203	534	LINE	#N/A	L1-43_XT	#N/A	LINE	3232
R=12102 (RR=12049. TRF=0.000 NSEG=0.039)	534	Retro	#N/A	#N/A	#N/A	Retro	1602
Contig1177	533	LTR	#N/A	BEL-5-I_HM	#N/A	LTR	2138
Contig2081	533	LINE	#N/A	#N/A	#N/A	LINE	2130
Contig1790	532	LINE	#N/A	KenoDr1	#N/A	LINE	2870
Contig241	532	LINE	#N/A	Rex1-1_PM	#N/A	LINE	45805
Contig2752	532	LINE	#N/A	Tc1-4Ory	#N/A	LINE	159944
R=11590 (RR=11544. TRF=0.000 NSEG=0.043)	532	LINE	#N/A	Kolobok-17_HM,FW2_DM	#N/A	LINE	1596
R=4207 (RR=4190. TRF=0.000 NSEG=0.126)	532	Retro	#N/A	ERV1-3-I_XT	#N/A	Retro	4132
Contig1596	531	LINE	#N/A	#N/A	#N/A	LINE	4498
R=11269 (RR=11224. TRF=0.000 NSEG=0.074)	530	DNA	#N/A	#N/A	#N/A	DNA Transposon	15646
Contig1728	529	LINE	#N/A	Tc1-14_Xt	#N/A	LINE	21512
Contig2572	528	LTR	#N/A	L1-39_XT	#N/A	LTR	10944
Contig2706	528	LTR	#N/A	SINE3_AFC,DNA8-74_AP	#N/A	LTR	3373
Contig2207	527	LINE	#N/A	#N/A	#N/A	LINE	1581
Contig2220	527	DNA	#N/A	#N/A	#N/A	DNA Transposon	1581
Contig2269	527	LINE	#N/A	I_Ele4C_AAe,Gypsy-6_PPa-LTR	#N/A	LINE	1771
Contig2779	527	LTR	#N/A	#N/A	#N/A	LTR	5066
Contig322	527	Retro	#N/A	#N/A	#N/A	Retro	11118
Contig1556	526	LINE	#N/A	#N/A	#N/A	LINE	3136
Contig1731	526	LTR	#N/A	LTR191B_MD	#N/A	LTR	3042
Contig2875	526	LINE	#N/A	#N/A	#N/A	LINE	2590
Contig2384	525	LINE	#N/A	#N/A	#N/A	LINE	33040
Contig601	525	LTR	#N/A	#N/A	#N/A	LTR	2720
Contig2511	524	LINE	#N/A	BEL-1_GA-I	#N/A	LINE	3708
Contig706	523	LINE	#N/A	#N/A	#N/A	LINE	4990
Contig145	522	LINE	#N/A	Gypsy-70_CQ-I	#N/A	LINE	30569
Contig90	522	LINE	#N/A	DM176,Rex1-3_FR	#N/A	LINE	40502
Contig408	521	unclear	#N/A	SYNLACZB,Gypsy-6_PIT-I	#N/A	unclear	19302
R=1409 (RR=1398. TRF=0.000 NSEG=0.253)	521	SINE	LINE	REX1-6_XT,CR1-2_FR,CR1-20_DR	#N/A	SINE	12514
R=9033 (RR=9004. TRF=0.000 NSEG=0.038)	521	LTR	#N/A	#N/A	#N/A	LTR	3149
Contig1608	520	LINE	#N/A	#N/A	#N/A	LINE	2810
R=8400 (RR=8373. TRF=0.000 NSEG=0.146)	520	LTR	#N/A	#N/A	#N/A	LTR	12967
Contig2061	519	LINE	#N/A	BMMAR3	#N/A	LINE	2156
R=11902 (RR=11853. TRF=0.000 NSEG=0.000)	519	LTR	#N/A	SINE_FR1D	#N/A	LTR	3061
Contig1134	518	LINE	#N/A	#N/A	#N/A	LINE	2072
Contig1197	518	LTR	#N/A	I-4_DAn	#N/A	LTR	2123
Contig1516	518	LTR	#N/A	Copia-21_SI-I	#N/A	LTR	3030
Contig1909	518	LINE	#N/A	#N/A	#N/A	LINE	2502
Contig2246	518	LINE	#N/A	Tc1-1Neo,Tc1-2Onc	#N/A	LINE	1776
Contig1994	517	LINE	#N/A	hAT-5_SM	#N/A	LINE	7721
Contig209	517	LTR	#N/A	Gypsy20-I_SP,Ginger-1_Chlorella_NC64A	#N/A	LTR	29628
Contig2882	517	LINE	#N/A	#N/A	#N/A	LINE	5451
Contig329	517	DNA	#N/A	Tc1-1_ACar	#N/A	DNA Transposon	8979
Contig423	517	LINE	#N/A	#N/A	#N/A	LINE	4122
Contig692	517	LTR	#N/A	tRNA-Met-i,piggyBac-2_XT	#N/A	LTR	2352
Contig887	517	LTR	#N/A	#N/A	#N/A	LTR	3095
R=6908 (RR=6884. TRF=0.052 NSEG=0.060)	517	unclear	#N/A	#N/A	#N/A	unclear	22409
Contig1374	516	LTR	#N/A	#N/A	#N/A	LTR	4326
Contig1397	516	LINE	#N/A	#N/A	#N/A	LINE	9185
R=12685 (RR=12627. TRF=0.000 NSEG=0.047)	516	LINE	#N/A	LTR1_Rn	#N/A	LINE	1548
Contig2203	515	LINE	#N/A	#N/A	#N/A	LINE	1545
Contig2582	515	LINE	#N/A	MuDR-5_TV,Tc1-15_Xt	#N/A	LINE	1545
Contig26	515	LINE	#N/A	MARNA,ETnERV2	#N/A	LINE	113191
Contig2857	515	LINE	#N/A	BEL-1_GA-I	#N/A	LINE	1811
Contig691	515	LINE	#N/A	HAT3NA1_MD	#N/A	LINE	4043
Contig744	515	Retro	#N/A	CR1-112_AAe	#N/A	Retro	39845
R=14629 (RR=14555. TRF=0.132 NSEG=0.184)	515	Retro	#N/A	Tx1-1_AAe	#N/A	Retro	48655
R=5753 (RR=5733. TRF=0.000 NSEG=0.225)	515	LINE	#N/A	Swimmer,Gypsy2-I_SM	#N/A	LINE	5806
Contig684	514	LINE	#N/A	Gypsy-206_AA-I	#N/A	LINE	3599
R=13388 (RR=13325. TRF=0.000 NSEG=0.043)	514	unclear	#N/A	#N/A	#N/A	unclear	16727
R=9405 (RR=9375. TRF=0.000 NSEG=0.043)	514	LINE	#N/A	#N/A	#N/A	LINE	5720
Contig1429	513	LINE	#N/A	Sola2-2_HM	#N/A	LINE	7749
Contig1472	513	LTR	#N/A	#N/A	#N/A	LTR	2049
Contig2574	513	LINE	#N/A	Daphne-18_SP,Polinton-1_HM	#N/A	LINE	8468
Contig467	513	LINE	#N/A	#N/A	#N/A	LINE	4424
Contig1225	512	LINE	#N/A	#N/A	#N/A	LINE	2355
Contig356	512	LINE	#N/A	#N/A	#N/A	LINE	28046
R=853 (RR=842. TRF=0.000 NSEG=0.088)	512	LINE	#N/A	#N/A	#N/A	LINE	3917
R=11875 (RR=11826. TRF=0.000 NSEG=0.000)	511	LINE	#N/A	#N/A	#N/A	LINE	10099
R=3012 (RR=2999. TRF=0.000 NSEG=0.000)	511	LINE	#N/A	#N/A	#N/A	LINE	5320
R=5186 (RR=5166. TRF=0.000 NSEG=0.115)	511	LINE	#N/A	Helitron-N3_PPa	#N/A	LINE	2043
Contig292	510	LINE	#N/A	LTR46_BT	#N/A	LINE	6909
R=10581 (RR=10541. TRF=0.108 NSEG=0.227)	510	unclear	#N/A	Sola2-6_AAe,ERV46_MD_I	#N/A	unclear	154318
R=11087 (RR=11043. TRF=0.000 NSEG=0.055)	510	LINE	#N/A	Copia10-NVi_I	#N/A	LINE	35344
R=13471 (RR=13407. TRF=0.000 NSEG=0.049)	510	LINE	#N/A	R1B_DAn	#N/A	LINE	1530
R=2515 (RR=2502. TRF=0.000 NSEG=0.112)	510	LTR	#N/A	CR1-94_AAe	#N/A	LTR	6794
R=5590 (RR=5570. TRF=0.000 NSEG=0.000)	510	LINE	#N/A	#N/A	#N/A	LINE	6322
Contig1214	509	LTR	#N/A	#N/A	#N/A	LTR	2028
Contig1120	508	LINE	#N/A	Gypsy19-I_SP	#N/A	LINE	4636
Contig128	508	LTR	#N/A	#N/A	#N/A	LTR	8122
Contig466	507	LINE	#N/A	Gypsy-32_DAn-I	#N/A	LINE	924
R=9801 (RR=9768. TRF=0.095 NSEG=0.142)	507	LTR	#N/A	Kolobok-2_XT	#N/A	LTR	13974
Contig2239	506	Retro	#N/A	Tc1-15_Xt	#N/A	Retro	6346
Contig2305	506	LINE	#N/A	EnSpm-1_NVi	#N/A	LINE	2103
R=575 (RR=566. TRF=0.000 NSEG=0.136)	506	LTR	#N/A	Gypsy-47_GA-LTR	#N/A	LTR	28761
Contig598	505	LINE	#N/A	Gypsy7-NVi_I,L1-8_MD	#N/A	LINE	5441
R=12720 (RR=12662. TRF=0.000 NSEG=0.000)	505	LTR	#N/A	#N/A	#N/A	LTR	2098
Contig169	504	LINE	#N/A	#N/A	#N/A	LINE	6507
Contig570	504	LINE	#N/A	CR1-12_HM	#N/A	LINE	2661
Contig689	504	LINE	#N/A	DIRS-23_XT,BEL-87_AA-I	#N/A	LINE	12344
Contig874	504	LINE	#N/A	HERVE,EnSpm-8_OS	#N/A	LINE	6428
R=15229 (RR=15149. TRF=0.065 NSEG=0.065)	504	LTR	#N/A	#N/A	#N/A	LTR	12302
R=6578 (RR=6556. TRF=0.000 NSEG=0.000)	504	LTR	#N/A	GYPSY3_I	#N/A	LTR	40623
R=11023 (RR=10980. TRF=0.000 NSEG=0.112)	502	LINE	#N/A	TCA1_I	#N/A	LINE	16326
R=14332 (RR=14262. TRF=0.000 NSEG=0.106)	502	Retro	#N/A	#N/A	#N/A	Retro	76215
Contig538	501	LINE	#N/A	TX1_FR2	#N/A	LINE	5929
R=11505 (RR=11459. TRF=0.000 NSEG=0.188)	501	LTR	#N/A	#N/A	#N/A	LTR	2310
Contig2157	500	LTR	#N/A	#N/A	#N/A	LTR	1500
Contig2319	500	LINE	#N/A	AeTango2	#N/A	LINE	17309
R=14393 (RR=14323. TRF=0.000 NSEG=0.000)	500	DNA	#N/A	#N/A	#N/A	DNA Transposon	25304
Contig1532	499	LINE	#N/A	HERVIP10FH	#N/A	LINE	1992
Contig2336	498	DNA	#N/A	#N/A	#N/A	DNA Transposon	2540
Contig2894	498	LINE	#N/A	#N/A	#N/A	LINE	1494
Contig1236	497	LINE	#N/A	#N/A	#N/A	LINE	2580
R=905 (RR=894. TRF=0.000 NSEG=0.205)	497	Retro	#N/A	CR1-5_HM,Academ-2_CS,I-2_DR	#N/A	Retro	44281
Contig427	496	unclear	#N/A	L1-1_PVa,Tc1-1Neo	#N/A	unclear	47919
Contig895	496	LINE	#N/A	CR1-2_DAn,DIRS-13B_XT	#N/A	LINE	1983
R=492 (RR=483. TRF=0.000 NSEG=0.000)	496	DNA	#N/A	#N/A	#N/A	DNA Transposon	39676
R=7545 (RR=7521. TRF=0.000 NSEG=0.097)	496	LTR	#N/A	Gypsy-77_CQ-I	#N/A	LTR	6909
Contig1695	495	Retro	#N/A	BEL-4_GA-I	#N/A	Retro	3022
Contig2435	495	LINE	#N/A	P-9_HM	#N/A	LINE	1485
Contig2507	495	Retro	#N/A	Polinton-1N1_DR,ASAT_CY	#N/A	Retro	2004
R=11661 (RR=11614. TRF=0.000 NSEG=0.115)	495	Retro	#N/A	DNA-TA-6_CQ	#N/A	Retro	3182
Contig1623	494	Retro	#N/A	DM297_I,Polinton-1_SP	#N/A	Retro	3577
Contig2898	494	unclear	#N/A	L1-15_DR	#N/A	unclear	1586
R=2993 (RR=2980. TRF=0.000 NSEG=0.089)	494	LINE	#N/A	#N/A	#N/A	LINE	96
Contig1223	493	LINE	#N/A	NDNAX3_CE,Gypsy-16_Ano-I,Gypsy-95_AA-I	#N/A	LINE	11078
Contig568	493	LINE	#N/A	#N/A	#N/A	LINE	16435
R=10450 (RR=10413. TRF=0.000 NSEG=0.122)	493	DNA	#N/A	#N/A	#N/A	DNA Transposon	4841
R=6066 (RR=6046. TRF=0.000 NSEG=0.065)	491	LINE	#N/A	IAPLTR3_I	#N/A	LINE	3220
R=7007 (RR=6983. TRF=0.000 NSEG=0.081)	491	LINE	LINE	L1PB2c,Swimmer	#N/A	LINE	6001
Contig1482	490	LTR	#N/A	Kolobok-2_XT	#N/A	LTR
Contig1583	490	LINE	#N/A	#N/A	#N/A	LINE	3605
Contig233	490	DNA	#N/A	ISL2EU-1_HM	#N/A	DNA Transposon	6493
Contig383	490	LINE	#N/A	Polinton-1_DR	#N/A	LINE	7031
R=10354 (RR=10317. TRF=0.000 NSEG=0.057)	490	Retro	#N/A	#N/A	#N/A	Retro	8920
R=11914 (RR=11865. TRF=0.000 NSEG=0.000)	490	LTR	#N/A	#N/A	#N/A	LTR	3894
Contig1488	489	LTR	#N/A	Jockey-6_DEl	#N/A	LTR	2128
R=11931 (RR=11882. TRF=0.000 NSEG=0.094)	489	LTR	#N/A	L1-1F_Cpo,Sola1-1_AC	#N/A	LTR	1746
R=15213 (RR=15134. TRF=0.000 NSEG=0.108)	489	LINE	#N/A	#N/A	#N/A	LINE	1467
R=8420 (RR=8393. TRF=0.000 NSEG=0.088)	489	LINE	#N/A	REX1-4_AFC,L1MC1,Crack-3_HM	#N/A	LINE	16351
Contig1453	488	unclear	#N/A	Rex1-3_FR,TguERV7_I	#N/A	unclear	38103
Contig1704	488	LTR	#N/A	BEL-21_AA-LTR	#N/A	LTR	2830
Contig2735	488	LINE	#N/A	#N/A	#N/A	LINE	1464
Contig2907	488	LINE	#N/A	L1-27_ACar	#N/A	LINE	1620
R=2129 (RR=2116. TRF=0.000 NSEG=0.121)	488	LTR	#N/A	#N/A	#N/A	LTR	18566
Contig1450	487	LINE	#N/A	#N/A	#N/A	LINE	5873
Contig2568	487	LTR	#N/A	#N/A	#N/A	LTR	2324
Contig632	487	LINE	#N/A	NTS_DM	#N/A	LINE	6409
Contig827	487	LTR	#N/A	#N/A	#N/A	LTR	2606
R=12707 (RR=12649. TRF=0.000 NSEG=0.000)	487	LINE	#N/A	Proto2-6_CS1	#N/A	LINE	1461
R=6671 (RR=6649. TRF=0.000 NSEG=0.037)	487	Retro	#N/A	#N/A	#N/A	Retro	2921
Contig1196	486	Retro	#N/A	Mariner-5_XT	#N/A	Retro	6900
Contig2101	486	LINE	#N/A	Polinton-1_DR,Polinton-2_XT	#N/A	LINE	3508
Contig2301	486	LTR	#N/A	#N/A	#N/A	LTR	1458
Contig1161	485	LTR	#N/A	Gypsy-130_AA-I	#N/A	LTR	2404
Contig1260	485	Retro	#N/A	#N/A	#N/A	Retro	2387
Contig2036	485	LINE	#N/A	#N/A	#N/A	LINE	1938
R=11039 (RR=10996. TRF=0.000 NSEG=0.118)	485	LINE	#N/A	Penelope-9_HM,Copia-71_MLP-LTR	#N/A	LINE	1455
R=3445 (RR=3431. TRF=0.000 NSEG=0.206)	485	LTR	#N/A	#N/A	#N/A	LTR	4172
Contig2753	484	LINE	#N/A	L2B-3_AAe,Mariner-34_HM	#N/A	LINE	1452
R=6840 (RR=6817. TRF=0.052 NSEG=0.399)	484	LINE	#N/A	Gypsy37-I_DR,Gypsy-26_AA-I	#N/A	LINE	3669
R=11944 (RR=11895. TRF=0.000 NSEG=0.062)	483	Retro	#N/A	Gypsy-600_AA-LTR	#N/A	Retro	1687
R=268 (RR=260. TRF=0.000 NSEG=0.066)	483	LTR	#N/A	#N/A	#N/A	LTR	10218
R=548 (RR=539. TRF=0.000 NSEG=0.041)	483	LTR	#N/A	DNA-AT-2_DR	#N/A	LTR	8823
R=937 (RR=926. TRF=0.000 NSEG=0.269)	483	Retro	#N/A	#N/A	#N/A	Retro	11073
R=11252 (RR=11208. TRF=0.000 NSEG=0.000)	482	LINE	#N/A	#N/A	#N/A	LINE	1446
R=12333 (RR=12278. TRF=0.000 NSEG=0.091)	482	LINE	#N/A	#N/A	#N/A	LINE	1446
R=13940 (RR=13874. TRF=0.000 NSEG=0.046)	482	LINE	#N/A	#N/A	#N/A	LINE	1446
R=1757 (RR=1746. TRF=0.000 NSEG=0.000)	482	LINE	#N/A	#N/A	#N/A	LINE
R=15203 (RR=15124. TRF=0.000 NSEG=0.204)	481	LINE	#N/A	Polinton-3_HM	#N/A	LINE	33537
R=4256 (RR=4239. TRF=0.000 NSEG=0.040)	481	Retro	#N/A	#N/A	#N/A	Retro	3937
Contig1768	480	LINE	#N/A	ENSPM_OS	#N/A	LINE	2399
R=6828 (RR=6805. TRF=0.000 NSEG=0.040)	480	Retro	#N/A	Helitron-2_DR	#N/A	Retro	8602
R=7657 (RR=7633. TRF=0.000 NSEG=0.098)	480	LINE	#N/A	Helitron-2_AAe,VANDAL2N1	#N/A	LINE	1971
Contig1246	479	LINE	#N/A	Copia-53_MLP-I	#N/A	LINE	5266
Contig2312	479	LINE	#N/A	PAL5A_CE,Polinton-1_DEl	#N/A	LINE	1606
Contig67	479	LTR	#N/A	Gypsy-24_GA-LTR,TOM_I	#N/A	LTR	28983
R=12824 (RR=12764. TRF=0.000 NSEG=0.175)	479	Retro	#N/A	Gypsy-5N_PPa-LTR	#N/A	Retro	1437
R=13413 (RR=13350. TRF=0.000 NSEG=0.000)	479	LINE	#N/A	#N/A	#N/A	LINE	2368
R=3645 (RR=3629. TRF=0.000 NSEG=0.294)	479	DNA	#N/A	Daphne-24_HMa	Sat_38	DNA Transposon	10366410
Contig1165	478	LTR	#N/A	CALTR1	#N/A	LTR	2276
Contig2286	478	LINE	#N/A	#N/A	#N/A	LINE	3318
Contig2656	478	unclear	#N/A	#N/A	#N/A	unclear	1434
R=10948 (RR=10905. TRF=0.000 NSEG=0.000)	478	LINE	#N/A	#N/A	#N/A	LINE	1434
R=7576 (RR=7552. TRF=0.000 NSEG=0.123)	478	LINE	#N/A	HARBINGER	#N/A	LINE	7318
Contig2879	477	LINE	#N/A	#N/A	#N/A	LINE	5327
Contig955	477	LINE	#N/A	#N/A	#N/A	LINE	16890
R=61 (RR=60. TRF=0.000 NSEG=0.000)	477	DNA	#N/A	hATx-1_SM	#N/A	DNA Transposon	98314
Contig1030	476	LTR	#N/A	Copia-43_PIT-I	#N/A	LTR	20810
Contig1324	476	LINE	#N/A	Gypsy-10_RP-LTR	#N/A	LINE	4191
Contig1368	476	LINE	#N/A	#N/A	#N/A	LINE	1904
Contig240	476	LINE	#N/A	#N/A	#N/A	LINE	6376
Contig2601	476	LTR	#N/A	#N/A	#N/A	LTR	1852
Contig2332	475	LTR	#N/A	#N/A	#N/A	LTR	1425
Contig771	475	LINE	#N/A	Gypsy-28_GA-I	#N/A	LINE	7292
R=13098 (RR=13036. TRF=0.000 NSEG=0.000)	475	LINE	#N/A	ATCOPIA66_I	#N/A	LINE	1425
Contig77	474	LINE	#N/A	#N/A	#N/A	LINE	38150
Contig929	474	unclear	#N/A	Polinton-1_XT	#N/A	unclear	8077
Contig236	473	LTR	#N/A	L2-1_FR1	#N/A	LTR	14323
Contig1733	472	LINE	#N/A	Swimmer,L1PB2c	#N/A	LINE	6403
Contig2049	472	unclear	#N/A	#N/A	#N/A	unclear	10229
Contig2775	472	unclear	#N/A	#N/A	#N/A	unclear	1416
Contig2788	472	LINE	#N/A	#N/A	#N/A	LINE	1416
Contig1736	471	LINE	#N/A	#N/A	#N/A	LINE	2710
Contig452	471	unclear	#N/A	#N/A	#N/A	unclear	41346
Contig83	471	LINE	#N/A	REX1-5_XT,MLT2D	#N/A	LINE	27299
R=277 (RR=269. TRF=0.000 NSEG=0.057)	471	LTR	hAT	#N/A	#N/A	LTR	44764
R=311 (RR=303. TRF=0.000 NSEG=0.079)	471	Retro	hAT	DNA6-1_CQ,GYPSY29-I_AG,MDG1_I	#N/A	Retro	52465
R=3393 (RR=3380. TRF=0.000 NSEG=0.183)	471	LINE	#N/A	Tx1-15_BF,EnSpm-14_HM,ATREP11A	#N/A	LINE	3959
Contig1380	470	LINE	#N/A	#N/A	#N/A	LINE	2400
Contig2402	470	LINE	#N/A	hAT-34_HM,hATm-24_HM	#N/A	LINE	1410
R=11696 (RR=11649. TRF=0.153 NSEG=0.000)	470	Retro	#N/A	Gypsy-125_AA-I,Mariner-9_SM	#N/A	Retro	6739
Contig1310	469	LTR	#N/A	#N/A	#N/A	LTR	1983
Contig1487	469	unclear	#N/A	ERV46_MD_I	#N/A	unclear	59652
Contig1524	469	LTR	#N/A	Crack-31_AAe	#N/A	LTR	2180
R=5441 (RR=5421. TRF=0.081 NSEG=0.188)	469	LTR	#N/A	BEL-9_DTa-LTR	#N/A	LTR	5456
R=5825 (RR=5805. TRF=0.000 NSEG=0.000)	468	LTR	#N/A	HERV1_I	#N/A	LTR	2823
R=1342 (RR=1331. TRF=0.000 NSEG=0.126)	467	LINE	#N/A	Gypsy-13_Ano-LTR	#N/A	LINE	4884
Contig1348	466	LINE	#N/A	Gypsy20-I_Dpse	#N/A	LINE	9682
Contig1735	466	LINE	#N/A	Sola3-1_BF	#N/A	LINE	1943
Contig1877	466	LINE	#N/A	#N/A	#N/A	LINE	2752
Contig2272	466	Retro	#N/A	CR1-42_DR	#N/A	Retro	2202
R=2967 (RR=2954. TRF=0.279 NSEG=0.124)	466	LINE	#N/A	#N/A	#N/A	LINE	2573
Contig1486	465	LINE	#N/A	#N/A	#N/A	LINE	17463
Contig733	465	LINE	#N/A	CR1-48_HM,Crack-1_AAe	#N/A	LINE	1856
R=14951 (RR=14875. TRF=0.000 NSEG=0.250)	464	LINE	#N/A	#N/A	#N/A	LINE	1856
R=5297 (RR=5277. TRF=0.000 NSEG=0.000)	464	LINE	#N/A	#N/A	#N/A	LINE	3124
R=4283 (RR=4265. TRF=0.000 NSEG=0.106)	463	LTR	#N/A	#N/A	#N/A	LTR	2785
Contig1267	462	LINE	#N/A	#N/A	#N/A	LINE	3278
R=12545 (RR=12489. TRF=0.000 NSEG=0.071)	462	LINE	#N/A	#N/A	#N/A	LINE	1386
R=3172 (RR=3159. TRF=0.206 NSEG=0.054)	462	DNA	#N/A	#N/A	T_213a,T_261	TR	147097
Contig1147	461	LINE	#N/A	hATm-28_HM,PiggyBac-2_HM	#N/A	LINE	9162
R=14005 (RR=13938. TRF=0.000 NSEG=0.061)	461	LINE	#N/A	#N/A	#N/A	LINE	118885
R=12713 (RR=12655. TRF=0.000 NSEG=0.028)	460	LINE	#N/A	#N/A	#N/A	LINE	1380
R=595 (RR=586. TRF=0.000 NSEG=0.135)	460	Retro	#N/A	#N/A	#N/A	Retro	65304
R=8179 (RR=8153. TRF=0.000 NSEG=0.080)	460	Retro	#N/A	Kolobok-20_HMa	#N/A	Retro	1686
Contig1137	459	LTR	#N/A	MARINER36_CB,Tc1-9_Xt	#N/A	LTR	52301
Contig634	459	unclear	#N/A	#N/A	#N/A	unclear	18441
R=14877 (RR=14802. TRF=0.148 NSEG=0.044)	459	LTR	#N/A	#N/A	#N/A	LTR	33377
R=12348 (RR=12293. TRF=0.000 NSEG=0.083)	458	LINE	#N/A	#N/A	#N/A	LINE	2101
R=12911 (RR=12851. TRF=0.000 NSEG=0.166)	458	LINE	#N/A	ATCOPIA31A_I	#N/A	LINE	1437
R=13420 (RR=13356. TRF=0.000 NSEG=0.096)	458	LINE	#N/A	#N/A	#N/A	LINE	1374
R=1666 (RR=1655. TRF=0.000 NSEG=0.240)	458	LTR	#N/A	#N/A	#N/A	LTR	1007
Contig1274	457	LINE	#N/A	XXU01086,Daphne-13_HMa,hATm-1_HM,ERV1-N3-I_DR	#N/A	LINE	3128
Contig1813	457	LINE	#N/A	#N/A	#N/A	LINE	2842
Contig2654	457	LINE	#N/A	FUGUREP3	#N/A	LINE	46244
Contig276	457	nonLTR	#N/A	#N/A	#N/A	nonLTR	6335
Contig2856	457	LTR	#N/A	#N/A	#N/A	LTR	1633
R=10615 (RR=10575. TRF=0.000 NSEG=0.055)	457	LINE	#N/A	RMER12C,MDG1_I	#N/A	LINE	573
R=13153 (RR=13091. TRF=0.000 NSEG=0.061)	457	Retro	#N/A	EnSpm-1_HM	#N/A	Retro	1588
R=2307 (RR=2294. TRF=0.000 NSEG=0.066)	457	Retro	#N/A	Polinton-1_DR,CR1-92_AAe	#N/A	Retro	6778
R=5739 (RR=5719. TRF=0.083 NSEG=0.221)	457	LINE	#N/A	MAX_I	#N/A	LINE	5658
Contig1079	456	unclear	#N/A	GLT2_SM	#N/A	unclear	2270
Contig1154	456	LINE	#N/A	Helitron-2_AAe,VANDAL2N1	#N/A	LINE
Contig2640	456	LINE	#N/A	#N/A	#N/A	LINE	6450
Contig479	456	LTR	#N/A	DNA-8-18_DR	#N/A	LTR	5477
R=8336 (RR=8309. TRF=0.000 NSEG=0.000)	455	LINE	#N/A	Gypsy-47_GA-I	#N/A	LINE	4984
Contig1758	454	unclear	#N/A	MINOS	#N/A	unclear	3652
R=12319 (RR=12264. TRF=0.000 NSEG=0.079)	454	LTR	#N/A	#N/A	#N/A	LTR	1362
Contig2481	453	LTR	#N/A	#N/A	#N/A	LTR	1359
Contig2853	453	unclear	#N/A	#N/A	#N/A	unclear	67993
Contig435	453	LINE	#N/A	#N/A	#N/A	LINE	4486
R=12837 (RR=12777. TRF=0.000 NSEG=0.066)	453	LINE	#N/A	#N/A	#N/A	LINE	1981
R=1665 (RR=1654. TRF=0.000 NSEG=0.000)	453	LTR	#N/A	#N/A	#N/A	LTR	6824
Contig758	452	DNA	#N/A	EnSpm-10_HM,piggyBac1_CB	#N/A	DNA Transposon	74110
Contig1043	451	LTR	#N/A	#N/A	#N/A	LTR	1858
Contig443	451	LINE	#N/A	EnSpm-4_DR	#N/A	LINE	3798
Contig859	451	LINE	#N/A	PlatERVR2a	#N/A	LINE	18160
Contig313	450	LINE	#N/A	#N/A	#N/A	LINE	7316
Contig1765	449	LINE	#N/A	ATHAT10	#N/A	LINE	8018
Contig2316	449	Retro	#N/A	Mariner-N2_DR	#N/A	Retro	1347
R=6468 (RR=6446. TRF=0.000 NSEG=0.285)	449	LINE	#N/A	MARINER10_CB	#N/A	LINE	1801
[truncated: 6,251 more rows]
