# Supplementary material for: Chromosomal-Level Assembly of the Asian Seabass Genome Using Long Sequence Reads and Multi-layered Scaffolding
Source: PLoS Genet. 2016 Apr 15;12(4):e1005954. doi: 10.1371/journal.pgen.1005954 (PMC4833346; doi:10.1371/journal.pgen.1005954)
Supplement: S7 Table — (XLSX) [file pgen.1005954.s022.xlsx]

## Sheet: 7
S7 Table. Summary of transposable elements identified in the Asian seabass genome
	Length (bp)	Percentage
DNA transposons	36236415	5.4165
LINEs	26771150	4.00167
LTRs	31031005	4.63842
Retro transposons	13916906	2.08026
SINEs	2634103	0.393737
Non-LTRs	1132979	0.169354
Complex	6520952	0.974731
unclear	10615726	1.58681
