# Supplementary material for: Chromosomal-Level Assembly of the Asian Seabass Genome Using Long Sequence Reads and Multi-layered Scaffolding
Source: PLoS Genet. 2016 Apr 15;12(4):e1005954. doi: 10.1371/journal.pgen.1005954 (PMC4833346; doi:10.1371/journal.pgen.1005954)
Supplement: S9 Table — (XLSX) [file pgen.1005954.s024.xlsx]

## Sheet: 9
S9 Table. In silico enzyme selection for optical mapping
Enzyme	5kb-20kb (%)	6kb-15kb (%)	6kb-12kb (%)	AFS (kb)	#frags>100kb	Max_frag_size (kb)
AflII	64.47	16.08	14.85	5.48	7	189.02
BamHI	98.93	96.6	88.7	10.03	10	159.58
KpnI	79.98	13.94	3.12	16.75	145	323.77
NcoI	61.76	15.11	15.04	5.34	1	117.39
NheI	99.11	96.18	93.25	8.77	17	180
SpeI	98.66	93.09	89.89	7.74	4	150.92
BglII	6.58	0.5	0.5	4.27	2	117.39
EcoRI	82.29	18.86	18.82	5.12	1	114.77
MluI	0.28	0.1	0.1	50.25	1731	870.98
NdeI	8.15	5.64	5.14	3.61	1	112.9
PvuII	0	0	0	1.47	1	117.39
XbaI	97.6	86.59	85.99	6.71	2	117.39
XhoI	49.34	14.66	3.79	19.44	265	267.95
