# Supplementary material for: Chromosomal-Level Assembly of the Asian Seabass Genome Using Long Sequence Reads and Multi-layered Scaffolding
Source: PLoS Genet. 2016 Apr 15;12(4):e1005954. doi: 10.1371/journal.pgen.1005954 (PMC4833346; doi:10.1371/journal.pgen.1005954)
Supplement: S21 Table — (XLSX) [file pgen.1005954.s036.xlsx]

## Sheet: 21
S21 Table. Sample collection details for Asian seabass whole genome resequencing effort
S.No.	Country	Location	Classification	Wild-type/Farmed	Number of fishes
1	Australia-Darwin	Darwin Harbour N.T.	Australia/Papua New Guinea	Wild-caught	6
2	Papua New Guinea	Fly River	Australia/Papua New Guinea	Wild-caught	5
3	Australia-Queensland	Hinchinbrook Channel	Australia/Papua New Guinea	Wild-caught	6
4	Indonesia	Galesong village,Takalar Regency of South Sulawesi province	S-E Asia/Philippines	Not ascertained	1
5	Indonesia	Samarinda, Kalimantan	S-E Asia/Philippines	Not ascertained	5
6	Cambodia	Praek koh puor, Koh kong province (2)+Praek lam dam, Khum koh ka pik (1)+Koh Krass, Toul Pour, Ta Nu (1)+Koh Krass, Toul Pour, Ta Nu (1)	S-E Asia/Philippines	Wild-caught	5
7	Thailand	Thailand-EastCoast	S-E Asia/Philippines	Wild-caught	7
8	Philippines	Luzon	S-E Asia/Philippines	Hatchery broodstock (SEAFDEC) originating from wild caught	5
9	Vietnam	Vietnam	S-E Asia/Philippines	Hatchery broodstock (central Vietnam, Nha Trang, Khánh Hòa Province) originating from wild-caught	2
10	Indonesia	South of Jakarta	S-E Asia/Philippines	Wild-caught	5
11	India-Eastern Coast	Pazhayar,TamilNadu	India	Wild-caught	9
12	India-Western Coast	Sasson dock, Mumbai	India	Wild-caught	5
13	Singapore	Singapore	S-E Asia/Philippines	Hatchery broodstock (MAC, SG) originating from wild caught; used to generate the reference genome	1
				Total	62
